# Supplementary material for: The utility of dimolybdenum tetrakis(μ-isovalerate) and tetrakis(μ-pivalate) in the stereochemical studies of various transparent compounds
Source: Royal Society of Chemistry journal article supplement (doi:10.1039/c4ra07408d), 2014-09-02
Supplement: c4ra07408d1.pdf [file c4ra07408d1.pdf]

THE UTILITY OF DIMOLYBDENUM TETRAKIS( $\mu$ -ISOVALERATE) AND TETRAKIS( $\mu$ -PIVALATE) IN THE STEREOCHEMICAL STUDIES OF VARIOUS TRANSPARENT COMPOUNDS

Magdalena Jawiczuk, Joanna E. Rode, Agata Suszczyńska, Adam Szugajew,<sup>†</sup> and Jadwiga Frelek,\*

*Institute of Organic Chemistry, Polish Academy of Sciences, Kasprzaka 44/52, 01-224 Warsaw, Poland*

**Supporting Information**  
**Table of Contents**

**I. General Experimental Methods**

**II. Spectroscopic Details**

**III. Computational Details**

**I. General Experimental Methods**

The ECD spectra were acquired at room temperature in  $\text{CHCl}_3$ ,  $\text{CH}_3\text{CN}$  and DMSO (for UV-Spectroscopy, Fluka) on a Jasco J-715 and J-815 spectropolarimeters and were collected at 0.5 nm/step with an integration time of 0.25 s over the range 200–900 nm with 200 nm/min scan speed, 5 scans. For the ECD standard measurements the chiral ligands (*ca.* 0.003 M) was mixed with stock complex  $[\text{Mo}_2(\text{COOR})_4]$  (*ca.* 0.002 M) and dissolved in respective solvent (5 mL) so that the molar ratio of the stock complex to ligand was about 1:1.5, in general. In this dimolybdenum methodology the concentration of the chiral complex formed by exchange of achiral carboxylate/s for chiral ligand molecule/s is not known. Thus, the ECD results are reported as the  $\Delta\epsilon'$  values which are calculated in the same way as  $\Delta\epsilon$  according to equation  $\Delta\epsilon' = \Delta A/c \times d$  in which *c* defines the molar concentration of the chiral ligand, *A* - the absorption and *d* - the path length.

UV–Vis spectra were measured on a Varian spectrophotometer UV-Vis Carry 100E or on a Jasco V-670 UV-Vis-NIR spectrophotometer in  $\text{CHCl}_3$ ,  $\text{CH}_3\text{CN}$  and DMSO.

---

<sup>†</sup> *Student of Materials Engineering Faculty of the Warsaw University of Technology, Wołoska 141, 02-507 Warsaw, Poland*

## II. Spectroscopic Details:

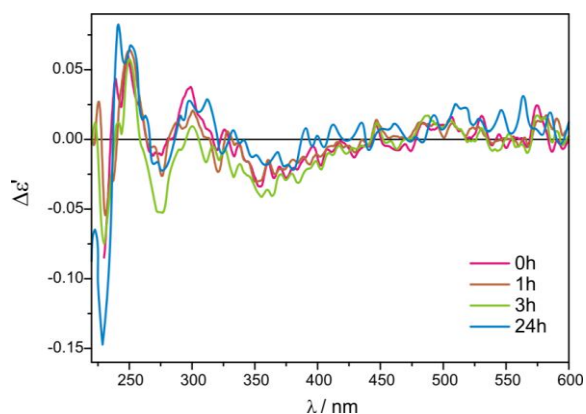

**Figure S1.** Time-dependent ECD measurements of *in situ* formed  $\text{Mo}_2$ -complexes of L-valine (1) with  $\text{Mo}_2$  in 1.5:1 ligand-to-complex molar ratio recorded in acetonitrile/water 4:1 ratio.

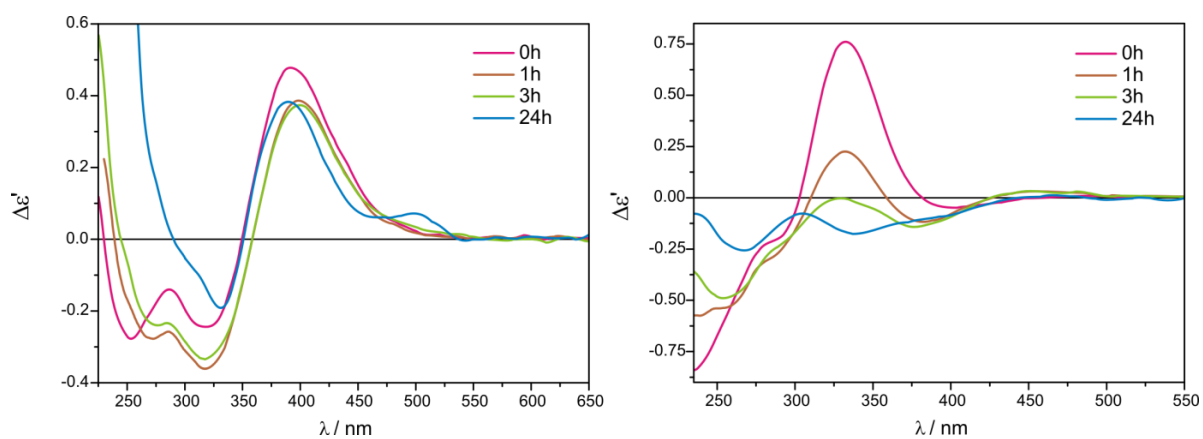

**Figure S2.** Time-dependent ECD measurements of *in situ* formed  $\text{Mo}_2$ -complexes of L-lactic acid (5) with  $\text{Mo}_2$  in 1.5:1 ligand-to-complex molar ratio recorded in acetonitrile (right) and in chloroform (left).

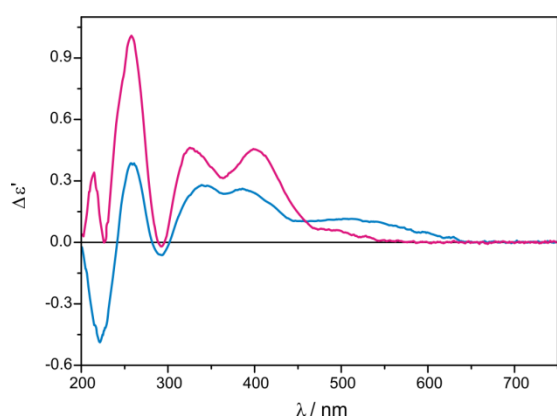

**Figure S3.** Concentration dependency of D-alaninol (7) with  $\text{Mo}_3$  complex recorded in  $\text{CH}_3\text{CN}$  immediately after dissolution; 1.5:1 ligand-to-complex molar ratio (blue), 3:1 ratio (purple).

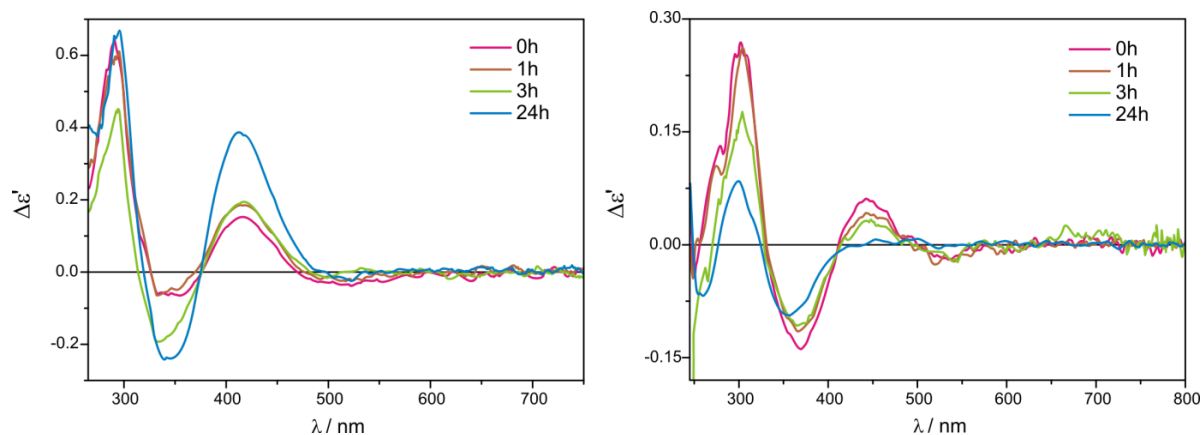

**Figure S4.** ECD spectra of *in situ* formed  $\text{Mo}_2$ -complexes of **Mo2** with (*R*)-propranolol (**10**) in 1.5:1 ligand-to-complex molar ratio, without (left) and with (right) a trace of alkali recorded in  $\text{CHCl}_3$ .

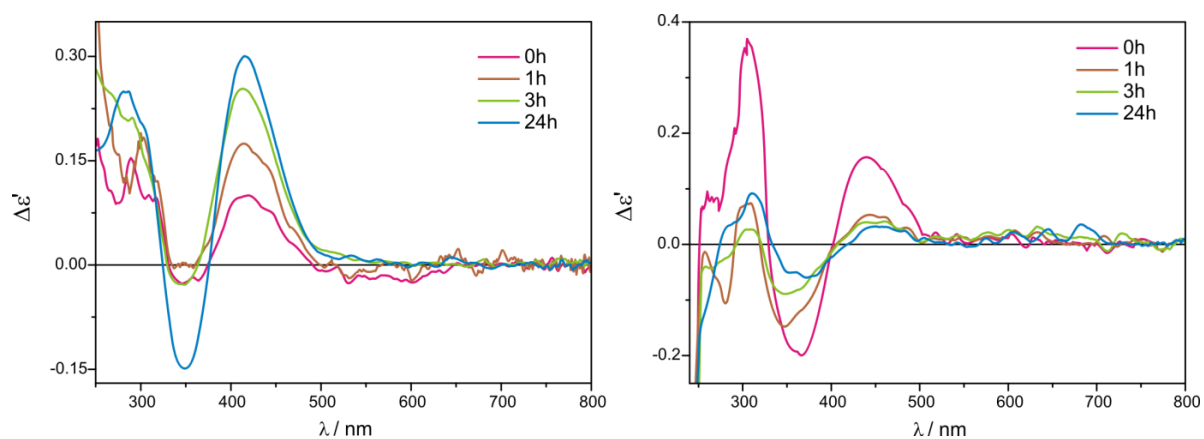

**Figure S5.** ECD spectra of *in situ* formed  $\text{Mo}_2$ -complexes of **Mo3** with (*R*)-propranolol (**10**) in 1.5:1 ligand-to-complex molar ratio, without (left) and with (right) a trace of alkali recorded in  $\text{CHCl}_3$ .

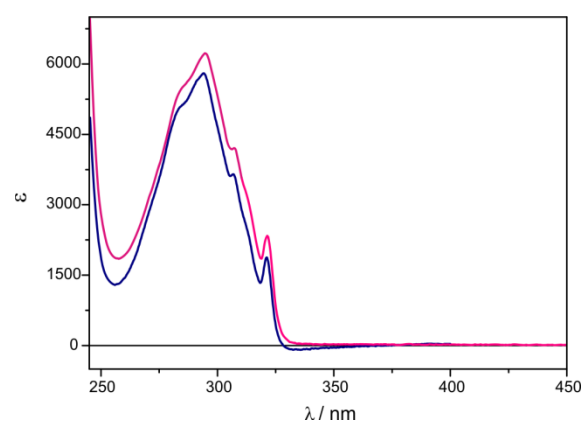

**Figure S6.** UV-Vis spectra of (*R*)-propranolol (**10**) without (blue line) and with (purple line) a trace of alkali recorded in  $\text{CHCl}_3$ .

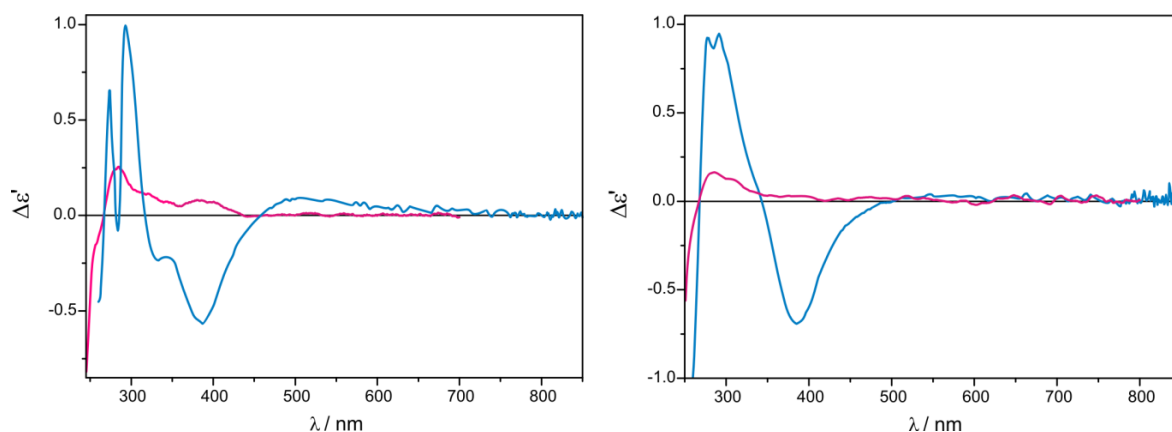

**Figure S7.** ECD spectra of *in situ* formed Mo<sub>2</sub>-complexes of **Mo2** (left) and **Mo3** (right) with *vic*-diamine **15** without (purple line) and with (blue line) a trace of alkali recorded in CHCl<sub>3</sub> immediately after dissolution in 1.5:1 ligand-to-complex molar ratio.

### III. Computational Details

As a model for computational study, the stock dimolybdenum *tetrakis*( $\mu$ -pivalate) complex [Mo<sub>2</sub>{(O<sub>2</sub>C<sub>2</sub>(CH<sub>3</sub>)<sub>3</sub>)<sub>4</sub>] (**Mo2**) was chosen because of its short side chain compared to the respective  $\mu$ -isovalerate (**Mo3**) analog. In the calculations *D*- $\alpha$ -alanine (**Ala**, **2**), *L*-mandelic acid (**MA**, **4**), *S*-1-amino-2-propanol (**APol**, **9**), (1*S*,2*S*)-diaminocyclohexane (**DACH**, **11**) and 3-phenyl-propane-1,2-diamine (**PhPDA**, **13**) were selected as chiral ligands. These ligands were chosen due to their size and rigidity to save the computational time and decrease the the number of possible conformers. Formation of bridged and chelated chiral **Mo2**-complexes was considered only (axial arrangements of the chiral ligands were excluded from the consideration because of the very long axial Mo $\cdots$ L distances, where L is a ligand).

**Table 1S1.** The energies (a.u), relative energies (kcal/mol) and population factors (%) of the mono- and dicoordinated dimolybdenum *tetrakis*( $\mu$ -pivalate) **Mo2** complexes calculated at the (DFT) B3LYP functional combined with LANL2DZ basis set and electron core potential for the molybdenum atoms, and the 6-31+G(d) basis set for C, N, H, O atoms.

| System                    | E            | E <sub>0</sub> | G            | $\Delta E$ | $\Delta E_0$ | $\Delta G$ | X(G.%) |
|---------------------------|--------------|----------------|--------------|------------|--------------|------------|--------|
| Monocoordinated complexes |              |                |              |            |              |            |        |
| Ala-bridge-1              | -1497.791666 | -1497.281681   | -1497.351646 | 0.00       | 0.00         | 0.00       | 100    |
| Ala-chel-1                | -1497.754040 | -1497.244863   | -1497.316616 | 23.61      | 23.10        | 21.98      | 0      |
| Ala-chel-1a               | -1497.754560 | -1497.245406   | -1497.314202 | 23.28      | 22.76        | 23.50      | 0      |
| MA-bridge-1               | -1709.397963 | -1708.847753   | -1708.921449 | 0.00       | 0.00         | 0.00       | 100    |
| MA-chel-1b                | -1709.360333 | -1708.811235   | -1708.887197 | 23.61      | 22.92        | 21.49      | 0      |
| APol-bridge-1             | -1423.719037 | -1423.189075   | -1423.256341 | 0.00       | 0.00         | 0.00       | 100    |
| APol-chel-1b              | -1423.662246 | -1423.135596   | -1423.205188 | 35.64      | 33.56        | 32.10      | 0      |
| DACH-bridge-1             | -1520.567022 | -1519.959795   | -1520.028420 | 0.00       | 0.00         | 0.00       | 100    |

|                                 |              |              |              |       |       |       |     |
|---------------------------------|--------------|--------------|--------------|-------|-------|-------|-----|
| DACH-chel-1b                    | -1520.551119 | -1519.944528 | -1520.014510 | 9.98  | 9.58  | 8.73  | 0   |
|                                 |              |              |              |       |       |       |     |
| PhPDA-bridge-1                  | -1634.882369 | -1634.259079 | -1634.333209 | 0.00  | 0.00  | 0.00  | 100 |
| PhPDA-chel-1                    | -1634.864150 | -1634.241735 | -1634.319094 | 11.43 | 10.88 | 8.86  | 0   |
|                                 |              |              |              |       |       |       |     |
| Dicoordinated complexes         |              |              |              |       |       |       |     |
| Ala-bridge-2 <i>cis</i> -b      | -1474.514965 | -1474.043384 | -1474.111214 | 0.17  | 0.00  | 1.65  | 6   |
| Ala-bridge-2 <i>trans</i>       | -1474.514502 | -1474.043388 | -1474.113838 | 0.47  | 0.00  | 0.00  | 93  |
| Ala-bridge-2 <i>trans</i> -b    | -1474.515243 | -1474.043281 | -1474.109840 | 0.00  | 0.07  | 2.51  | 1   |
| Ala-chel-2                      | -1474.476671 | -1474.006464 | -1474.075952 | 24.20 | 23.17 | 23.77 | 0   |
|                                 |              |              |              |       |       |       |     |
| MA-bridge-2 <i>trans</i>        | -1897.725935 | -1897.174786 | -1897.252700 | 0.00  | 0.00  | 0.00  | 100 |
| MA-chel-2a                      | -1897.688653 | -1897.138364 | -1897.218681 | 23.39 | 22.86 | 21.35 | 0   |
|                                 |              |              |              |       |       |       |     |
| APol-bridge-2 <i>cis</i> -b     | -1326.380065 | -1325.869291 | -1325.932478 | 0.00  | 0.00  | 0.00  | 100 |
| APol-bridge-2 <i>cis</i> -a     | -1326.363260 | -1325.852144 | -1325.915119 | 10.55 | 10.76 | 10.89 | 0   |
| APol-bridge-2 <i>trans</i> -b   | -1326.299511 | -1325.793686 | -1325.857654 | 50.55 | 47.44 | 46.95 | 0   |
| APol-bridge-2 <i>trans</i> -a   | -1326.363336 | -1325.852125 | -1325.915070 | 10.50 | 10.77 | 10.92 | 0   |
| APol-chel-2                     | -1326.294570 | -1325.789927 | -1325.857848 | 53.65 | 49.80 | 46.83 | 0   |
|                                 |              |              |              |       |       |       |     |
| DACH-bridge-2- <i>trans</i>     | -1520.063025 | -1519.398085 | -1519.467205 | 10.90 | 10.62 | 9.34  | 0   |
| DACH-bridge-2- <i>cis</i> -b    | -1520.066787 | -1519.402074 | -1519.470708 | 8.54  | 8.12  | 7.14  | 0   |
| DACH-bridge-2- <i>cis</i> -a    | -1520.068139 | -1519.403018 | -1519.470791 | 7.69  | 7.52  | 7.09  | 0   |
| DACH-chel-2                     | -1520.080395 | -1519.415009 | -1519.482085 | 0.00  | 0.00  | 0.00  | 100 |
|                                 |              |              |              |       |       |       |     |
| PhPDA-bridge-2- <i>cis</i> -b   | -1748.698153 | -1748.001007 | -1748.079263 | 8.50  | 8.58  | 7.77  | 0   |
| PhPDA-bridge-2- <i>cis</i> -a   | -1748.697479 | -1748.001039 | -1748.080206 | 8.92  | 8.56  | 7.17  | 0   |
| PhPDA-bridge-2- <i>trans</i> -b | -1748.696934 | -1748.000159 | -1748.078969 | 9.27  | 9.12  | 7.95  | 0   |
| PhPDA-bridge-2- <i>trans</i> -a | -1748.693280 | -1747.996354 | -1748.073888 | 11.56 | 11.50 | 11.14 | 0   |
| PhPDA-chel-2                    | -1748.711699 | -1748.014685 | -1748.091639 | 0.00  | 0.00  | 0.00  | 100 |

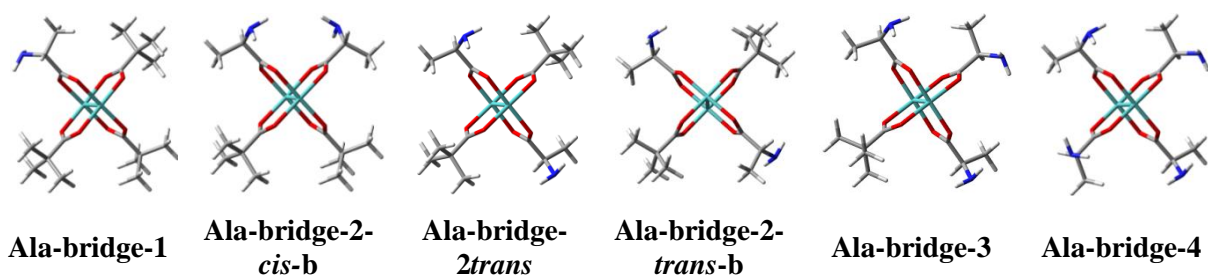

**Figure S8.** Optimized structures of bridged D- $\alpha$ -alanine (**Ala**, **2**) dimolybdenum *tetrakis*( $\mu$ -pivalate) **Mo**<sub>2</sub> complexes.

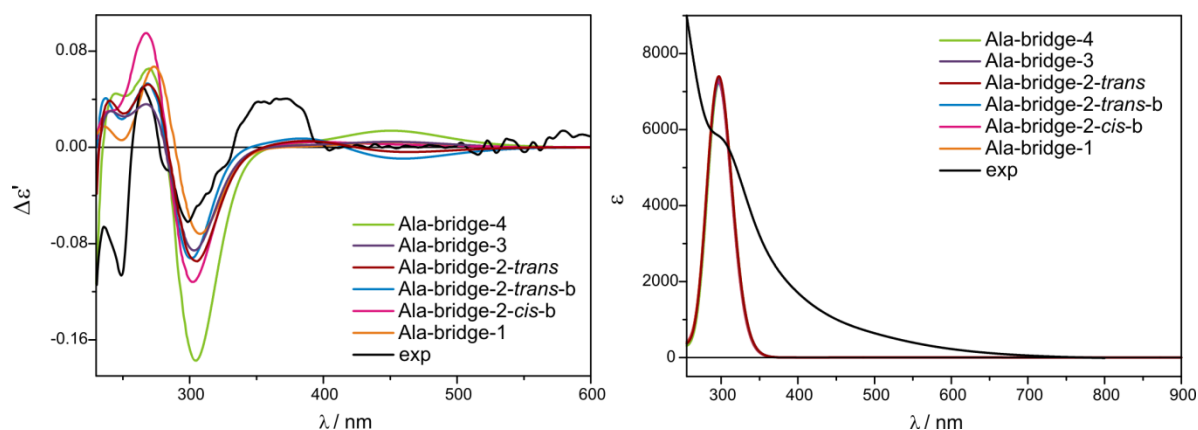

**Figure S9.** Comparison of the B3LYP calculated ECD (left) and UV-Vis (right) spectra of bridged D- $\alpha$ -alanine (**Ala**, **2**) dimolybdenum *tetrakis*( $\mu$ -pivalate) **Mo2** complexes with experimental data (**2**+**Mo2**, 1.5:1 ligand-to-complex molar ratio, recorded in a mixture of acetonitrile-water 4:1 ratio immediately after dissolving).

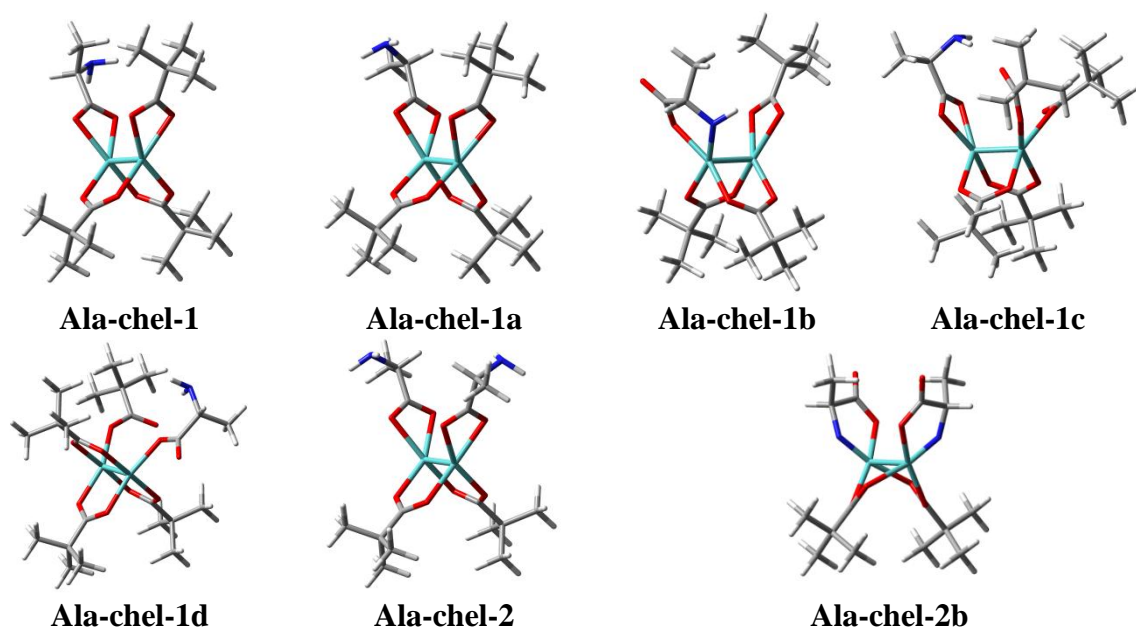

**Figure S10.** Optimized structures of chelated (chel) D- $\alpha$ -alanine (**Ala**, **2**) dimolybdenum *tetrakis*( $\mu$ -pivalate) **Mo2** complexes

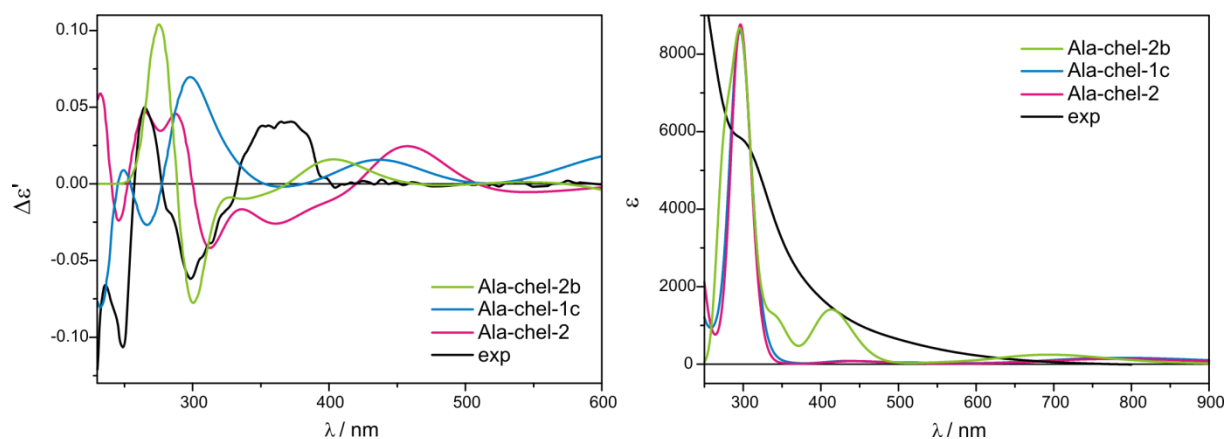

**Figure S11.** Comparison of the CAM-B3LYP calculated ECD (left) and UV-Vis (right) spectra of chelated (chel) D- $\alpha$ -alanine (**Ala**, **2**) dimolybdenum *tetrakis*( $\mu$ -pivalate) **Mo2** complexes with experimental data (**2+Mo2**, 1.5:1 ligand-to-complex molar ratio, recorded in a mixture of acetonitrile-water 4:1 ratio immediately after dissolving).

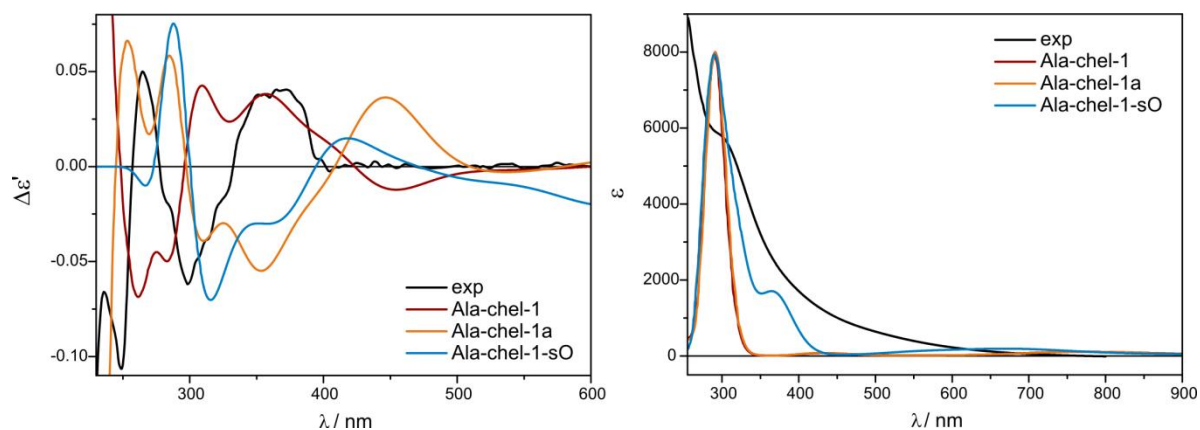

**Figure S12.** Comparison of the CAM-B3LYP calculated ECD (left) and UV-Vis (right) spectra of chelated (chel) D- $\alpha$ -alanine (**Ala**, **2**) dimolybdenum *tetrakis*( $\mu$ -pivalate) **Mo2** complexes with experimental data (**2+Mo2**, 1.5:1 ligand-to-complex molar ratio, recorded in a mixture of acetonitrile-water 4:1 ratio immediately after dissolving).

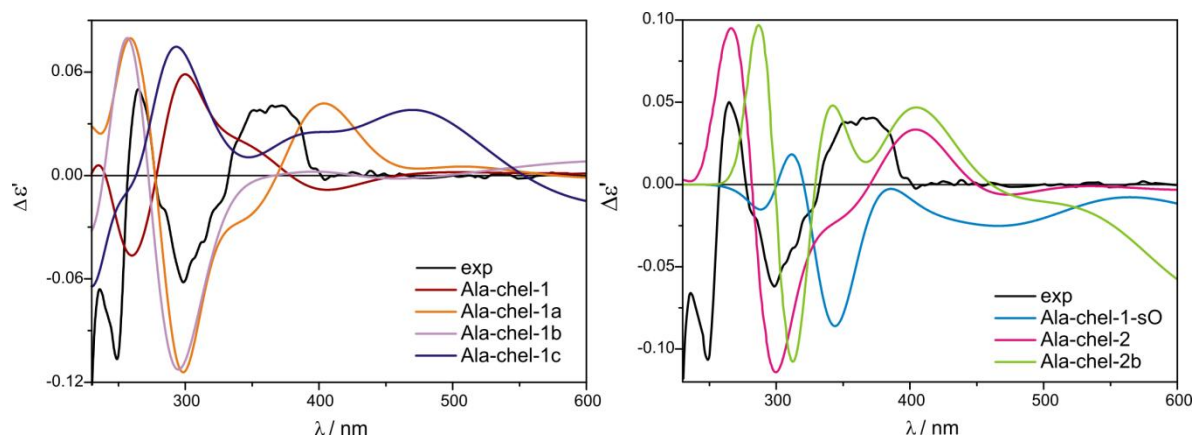

**Figure S13.** Comparison of the B3LYP calculated ECD spectra of chelated (chel) D- $\alpha$ -alanine (**Ala**, **2**) dimolybdenum *tetrakis*( $\mu$ -pivalate) **Mo2** complexes with experimental data (**2+Mo2**, 1.5:1 ligand-to-complex molar ratio, recorded in a mixture of acetonitrile-water 4:1 ratio immediately after dissolving).



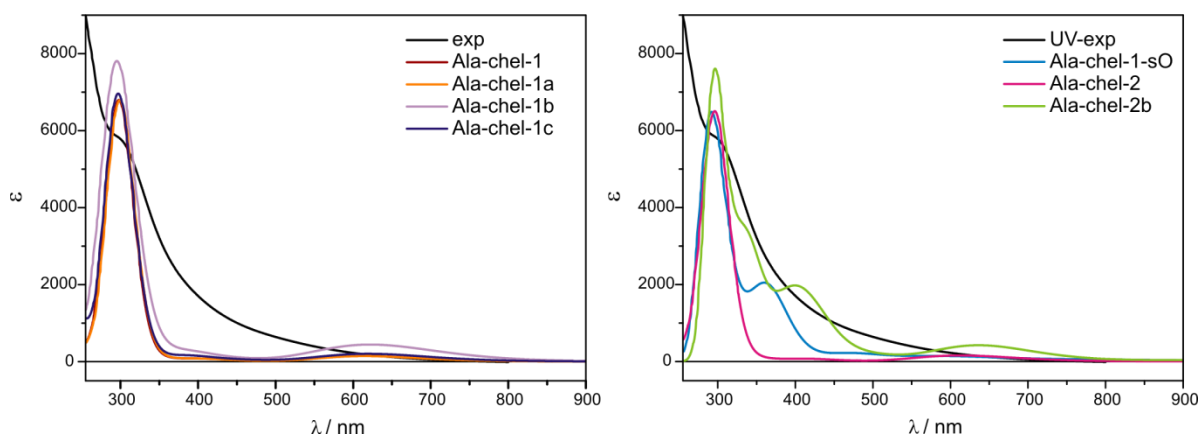

**Figure S13B.** Comparison of the B3LYP calculated UV-Vis spectra of chelated (chel) D- $\alpha$ -alanine (**Ala**, **2**) dimolybdenum *tetrakis*( $\mu$ -pivalate) **Mo2** complexes with experimental data (**2+Mo2**, 1.5:1 ligand-to-complex molar ratio, recorded in a mixture of acetonitrile-water 4:1 ratio immediately after dissolving).

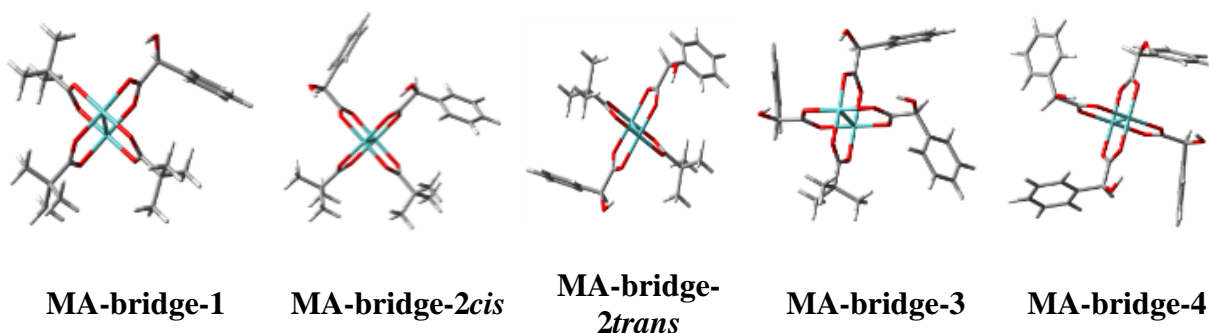

**Figure S14.** Optimized structures of bridged D- $\alpha$ -mandelic acid (**MA**, **4**) dimolybdenum *tetrakis*( $\mu$ -pivalate) **Mo2** complexes.

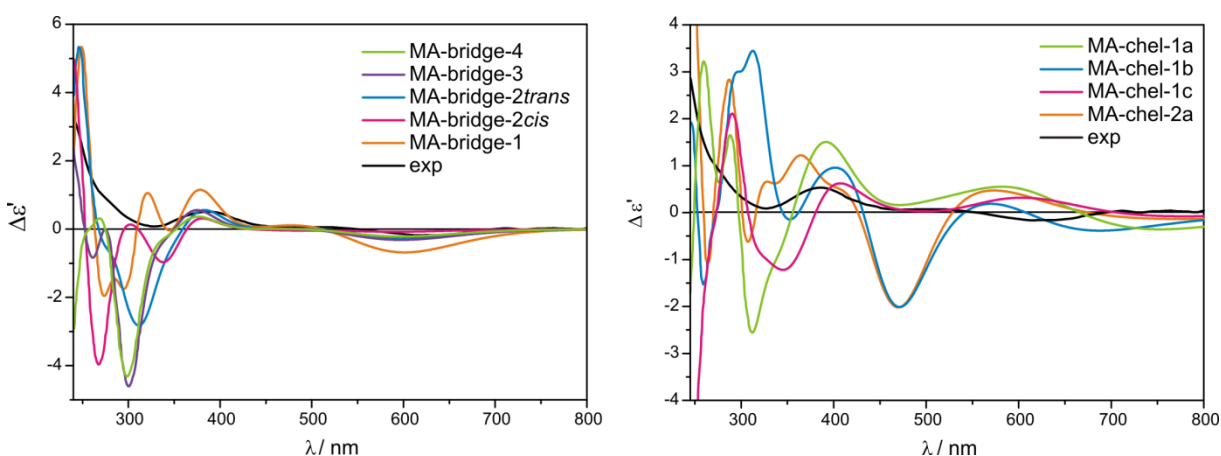

**Figure S15.** Comparison of the CAM-B3LYP calculated ECD spectra of bridged (left) and chelated (right) D- $\alpha$ -mandelic acid (**MA**, **4**) dimolybdenum *tetrakis*( $\mu$ -pivalate) **Mo2** complexes with experimental data (**4+Mo2**, 1.5:1 ligand-to-complex molar ratio, recorded in acetonitrile immediately after dissolving).



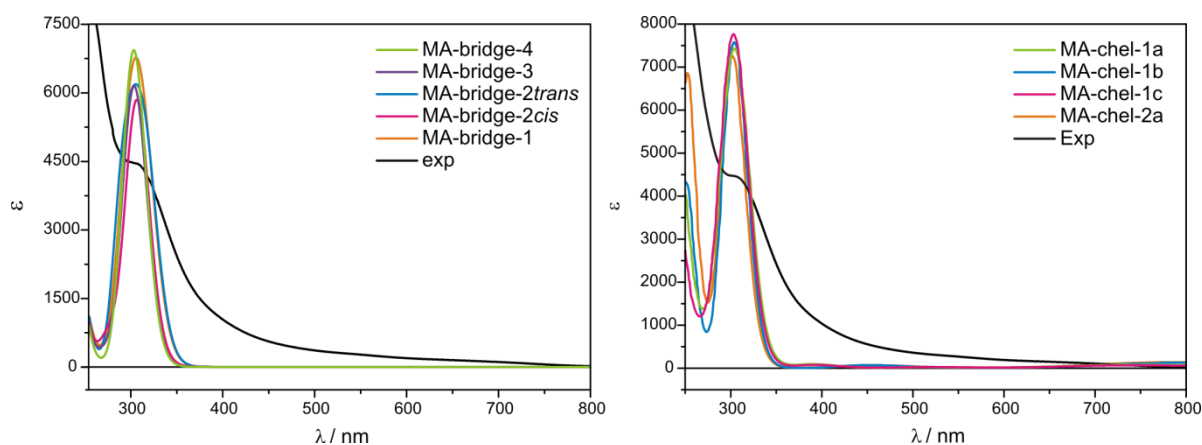

**Figure S15B.** Comparison of the CAM-B3LYP calculated UV-Vis spectra of bridged (left) and chelated (right) D- $\alpha$ -mandelic acid (**MA**, **4**) dimolybdenum *tetrakis*( $\mu$ -pivalate) **Mo2** complexes with experimental data (**4**+**Mo2**, 1.5:1 ligand-to-complex molar ratio, recorded in acetonitrile immediately after dissolving).

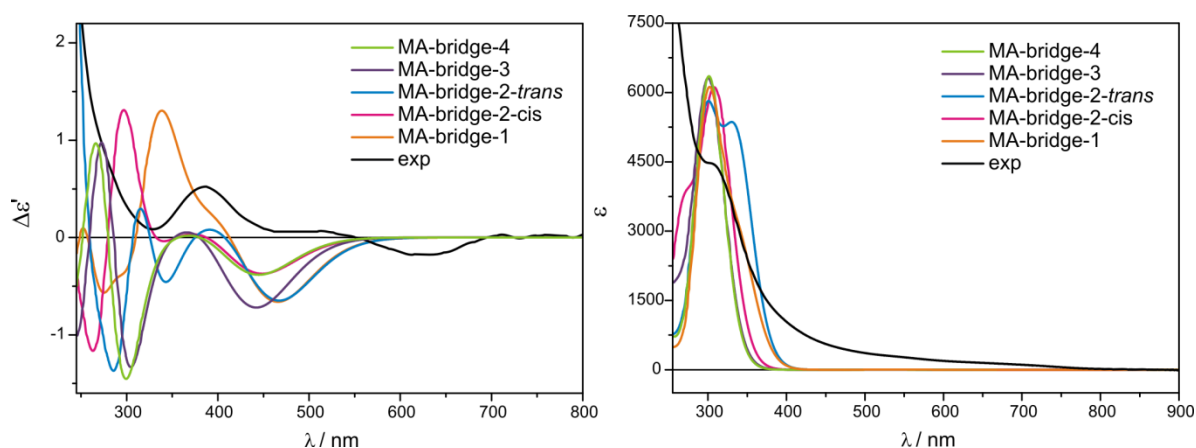

**Figure S16.** Comparison of the B3LYP calculated ECD (left) and UV-Vis (right) spectra of bridged D- $\alpha$ -mandelic acid (**MA**, **4**) dimolybdenum *tetrakis*( $\mu$ -pivalate) **Mo2** complexes with experimental data (**4** +**Mo2**, 1.5:1 ligand-to-complex molar ratio, recorded in acetonitrile immediately after dissolving).

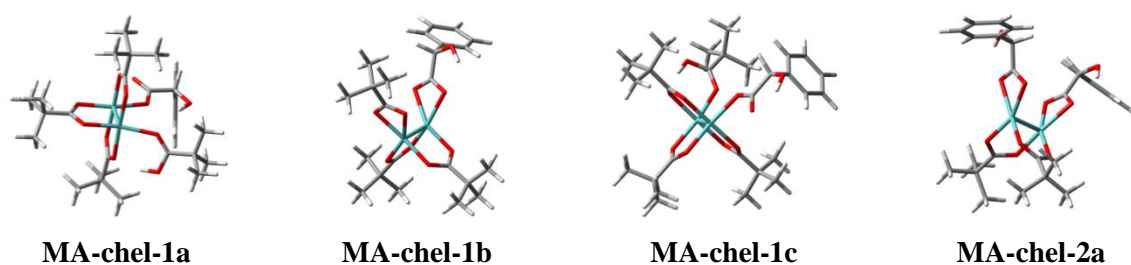

**Figure S17.** Optimized structures of chelated (chel) D- $\alpha$ -mandelic acid (**MA**, **4**) D- $\alpha$ -mandelic acid (**4**) dimolybdenum *tetrakis*( $\mu$ -pivalate) **Mo2** complexes.

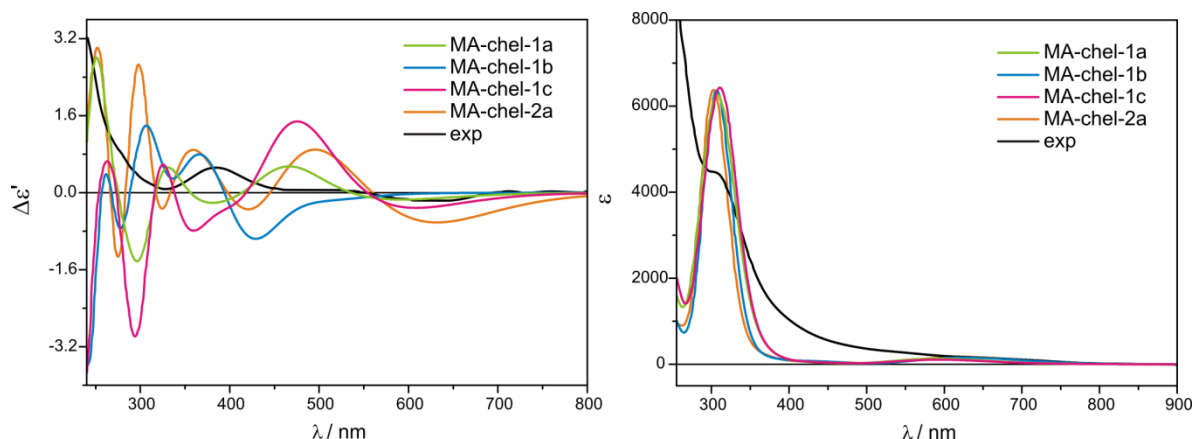

**Figure S18.** Comparison of the B3LYP calculated ECD (left) and UV-Vis (right) spectra of chelated (chel) *D*- $\alpha$ -mandelic acid (**MA**, **4**) dimolybdenum *tetrakis*( $\mu$ -pivalate) **Mo2** complexes with experimental data (**4**+**Mo2**, 1.5:1 ligand-to-complex molar ratio, recorded in acetonitrile immediately after dissolving).

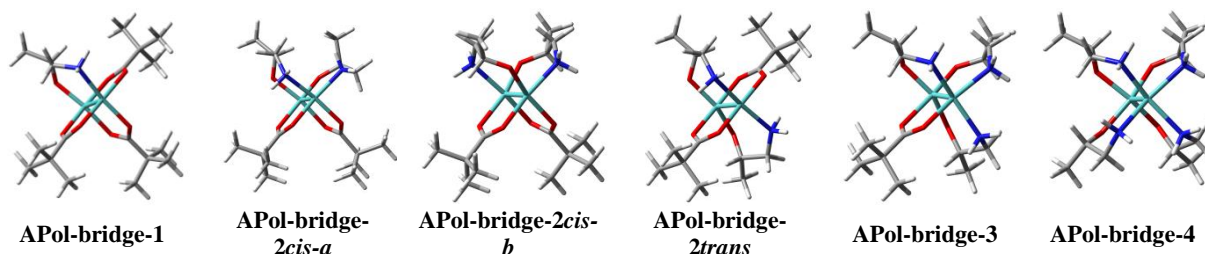

**Figure S19.** Optimized structures of bridged *S*-1-amino-2-propanol (**APol**, **9**) dimolybdenum *tetrakis*( $\mu$ -pivalate) **Mo2** complexes.

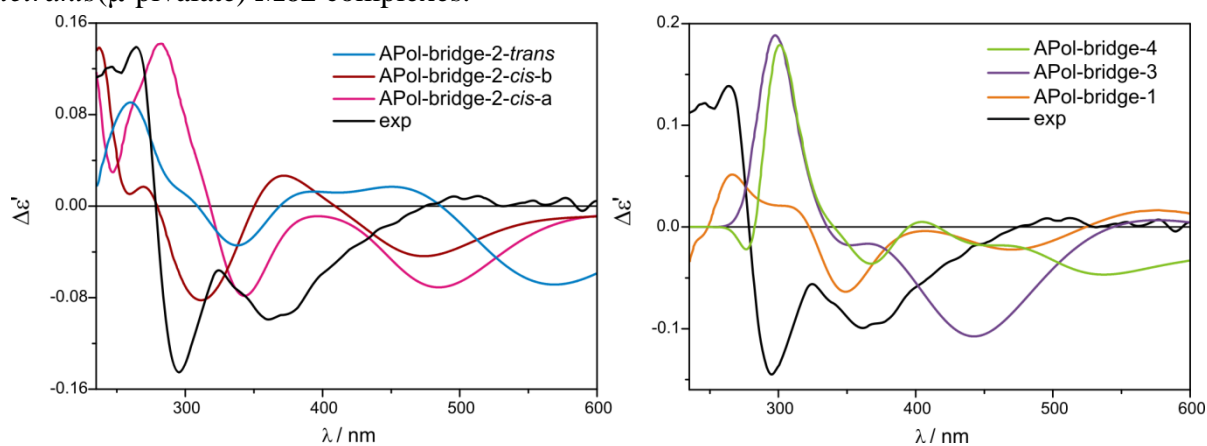

**Figure S20.** Comparison of the CAM-B3LYP calculated ECD spectra of bridged *S*-1-amino-2-propanol (**APol**, **9**) dimolybdenum *tetrakis*( $\mu$ -pivalate) **Mo2** complexes with experimental data (**9**+**Mo2**, 1.5:1 ligand-to-complex molar ratio, recorded in chloroform immediately after dissolving).

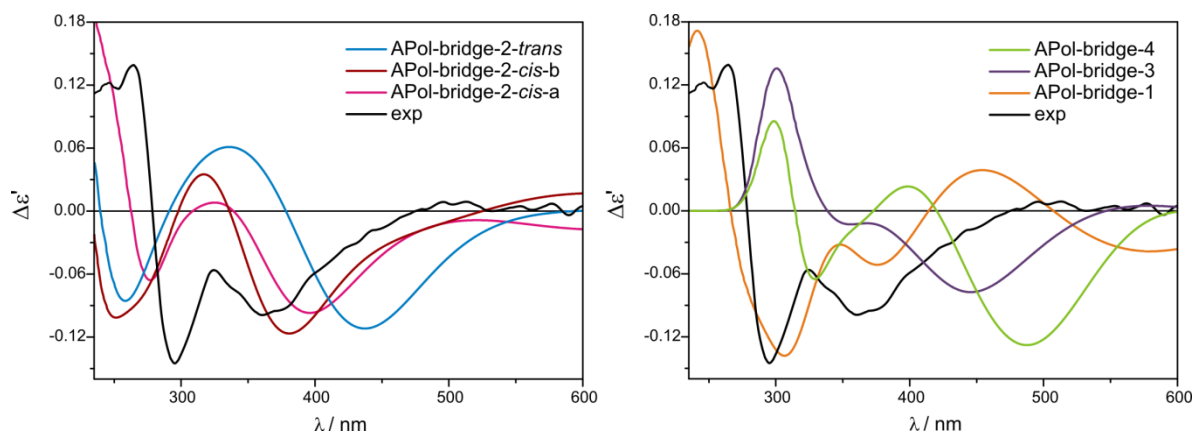

**Figure S21.** Comparison of the B3LYP calculated ECD spectra of bridged *S*-1-amino-2-propanol (APol, **9**) dimolybdenum *tetrakis*( $\mu$ -pivalate) **Mo2** complexes with experimental data (**9**+**Mo2**, 1.5:1 ligand-to-complex molar ratio, recorded in chloroform immediately after dissolving).

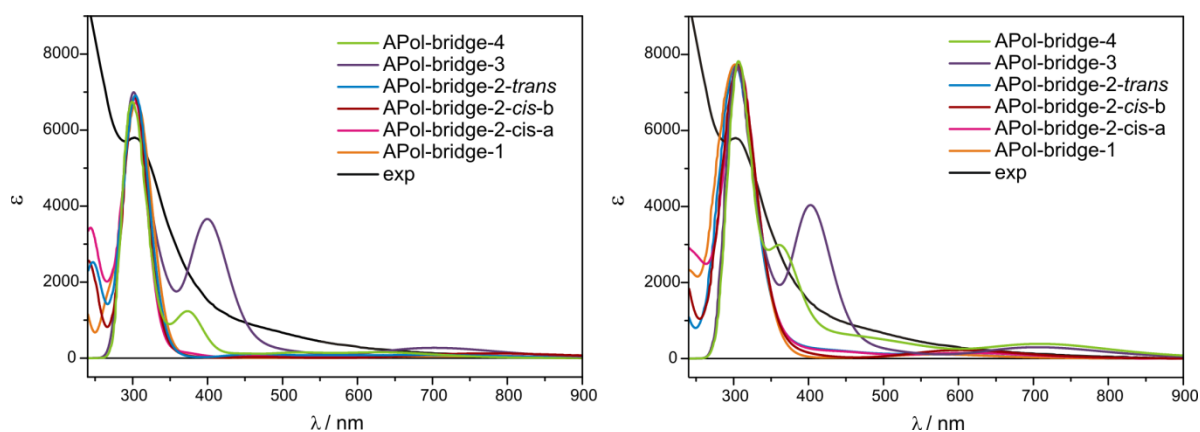

**Figure S22.** Comparison of UV-Vis spectra of the CAM-B3LYP (left) and B3LYP (right) of bridge *S*-1-amino-2-propanol (APol, **9**) dimolybdenum *tetrakis*( $\mu$ -pivalate) **Mo2** complexes with experimental data (**9**+**Mo2**, 1.5:1 ligand-to-complex molar ratio, recorded in chloroform immediately after dissolving).

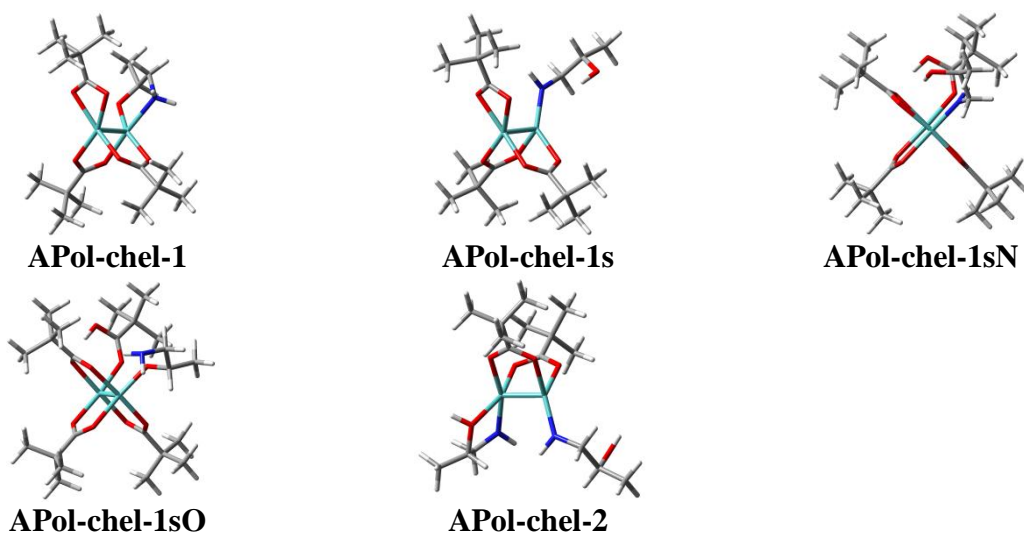

**Figure S23.** Optimized structures of selected mono- and disubstituted chelated (chel) *S*-1-amino-2-propanol (**APol**, **9**) dimolybdenum *tetrakis*( $\mu$ -pivalate) **Mo2** complexes.

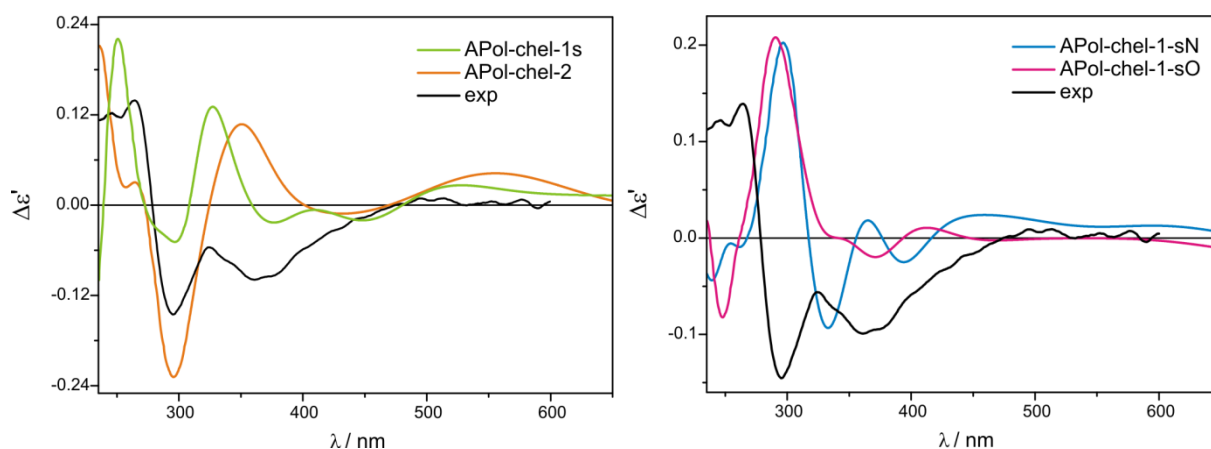

**Figure S24.** Comparison of the CAM-B3LYP calculated ECD spectra of chelated (chel) *S*-1-amino-2-propanol (**APol**, **9**) dimolybdenum *tetrakis*( $\mu$ -pivalate) **Mo2** complexes with experimental data (**9**+**Mo2**, 1.5:1 ligand-to-complex molar ratio, recorded in chloroform immediately after dissolving).

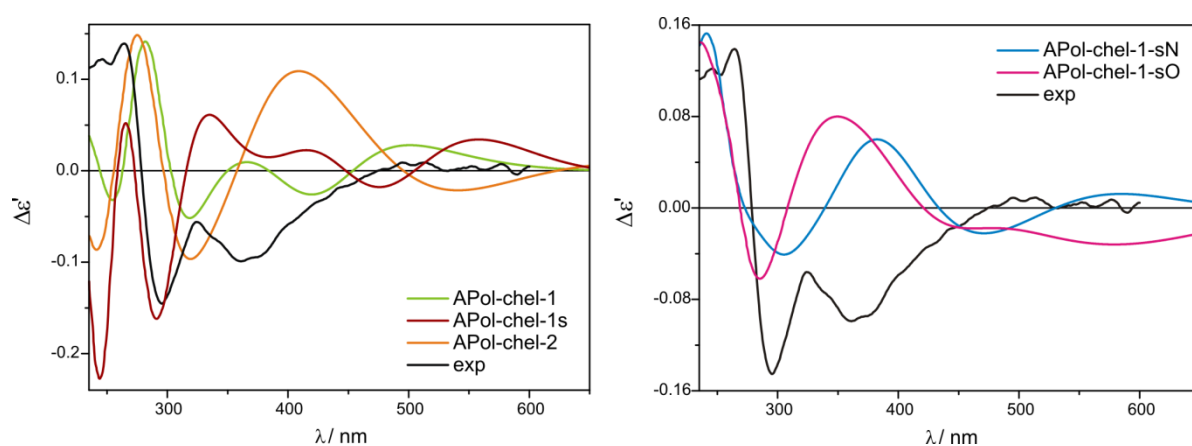

**Figure S25.** Comparison of the B3LYP calculated ECD spectra of chelated (chel) *S*-1-amino-2-propanol (**APol**, **9**) dimolybdenum *tetrakis*( $\mu$ -pivalate) **Mo2** complexes with experimental data (**9**+**Mo2**, 1.5:1 ligand-to-complex molar ratio, recorded in chloroform immediately after dissolving).

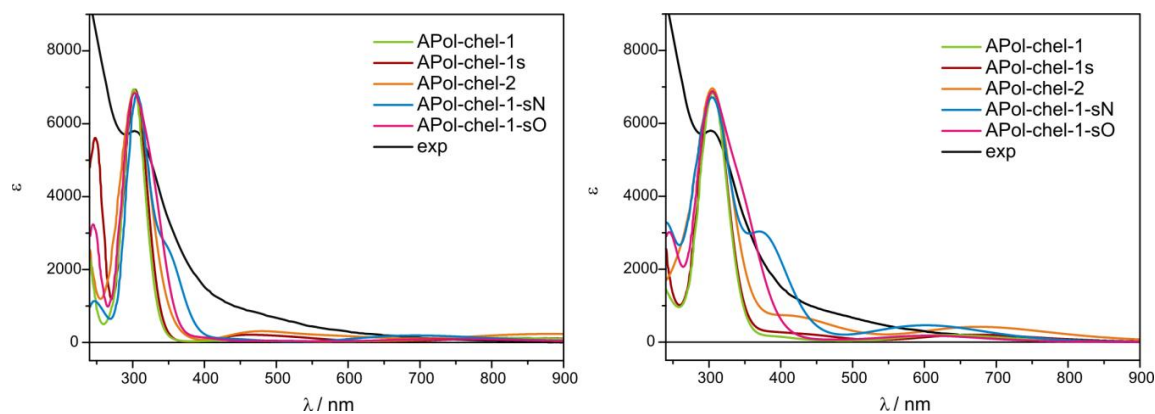

**Figure S26.** Comparison of UV-Vis spectra of the CAM-B3LYP (left) and B3LYP (right) of chelated *S*-1-amino-2-propanol (**APol**, **9**) dimolybdenum *tetrakis*( $\mu$ -pivalate) **Mo2** complexes with experimental data (**9+Mo2**, 1.5:1 ligand-to-complex molar ratio, recorded in chloroform immediately after dissolving).

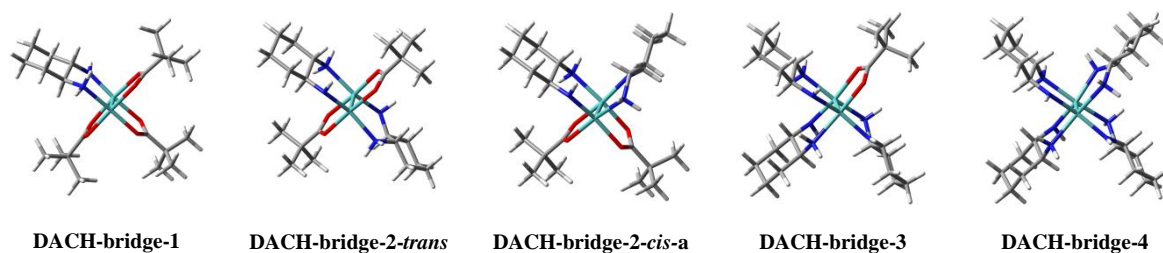

**Figure S27.** Optimized structures of bridged (*1S,2S*)-diaminocyclohexane (**DACH**, **11**) dimolybdenum *tetrakis*( $\mu$ -pivalate) **Mo2** complexes.

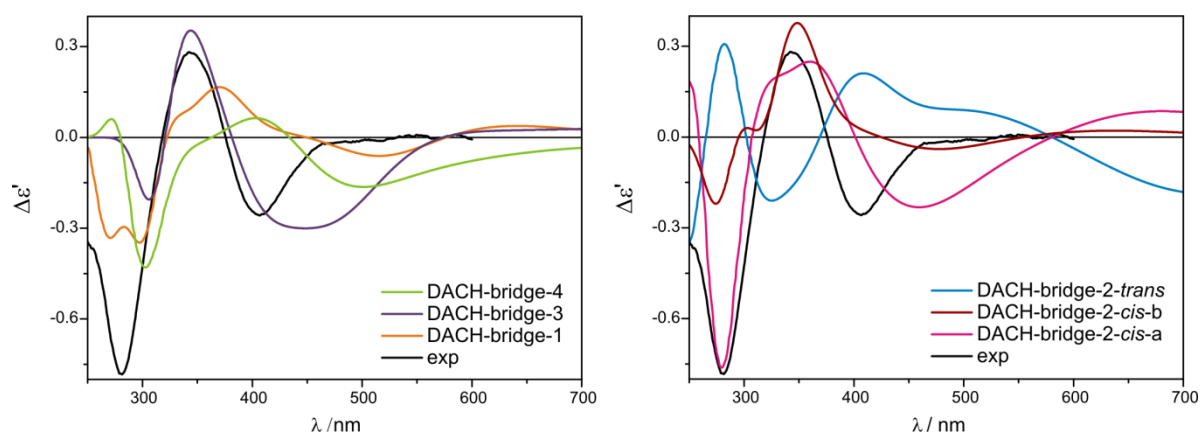

**Figure S28.** Comparison of the B3LYP calculated ECD spectra of bridged (*1S,2S*)-diaminocyclohexane (**DACH**, **11**) dimolybdenum *tetrakis*( $\mu$ -pivalate) **Mo2** complexes with experimental data (**11+Mo2**, 1.5:1 ligand-to-complex molar ratio, recorded in chloroform immediately after dissolving).

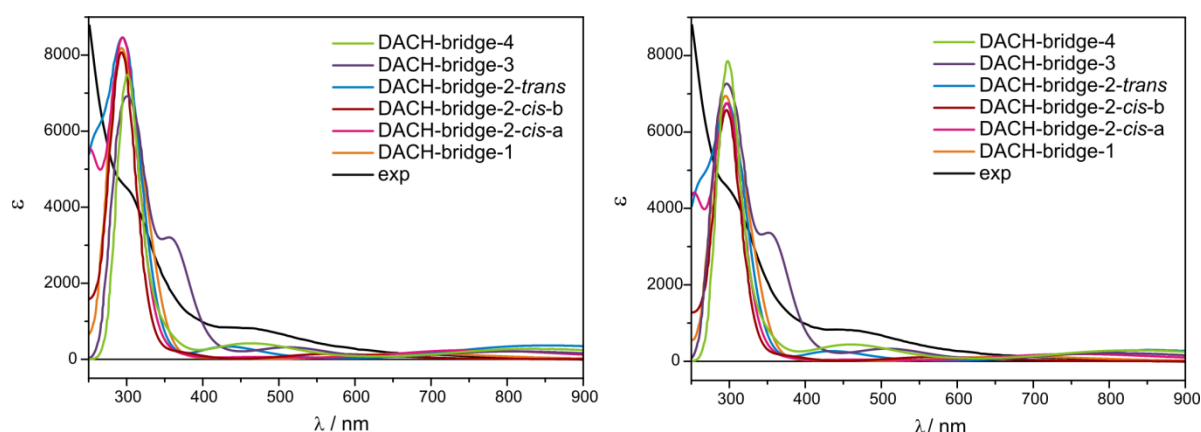

**Figure S29.** Comparison of UV-Vis spectra of the CAM-B3LYP (left) and B3LYP (right) of bridge (*1S,2S*)-diaminocyclohexane (**DACH**, **11**) dimolybdenum *tetrakis*( $\mu$ -pivalate) **Mo2** complexes with experimental data (**11+Mo2**, 1.5:1 ligand-to-complex molar ratio, recorded in chloroform immediately after dissolving).



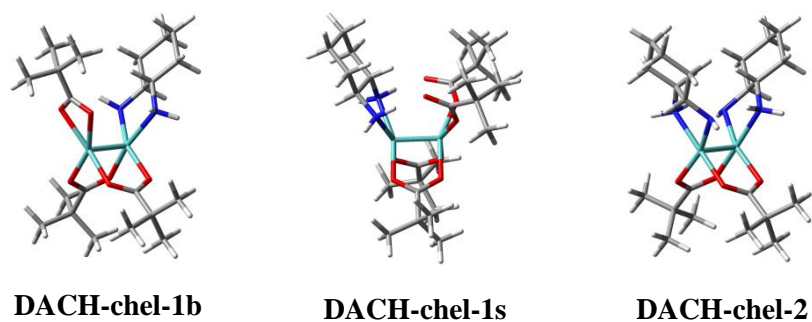

**Figure S30.** Optimized structures of chelated (chel) (1*S*,2*S*)-diaminocyclohexane (**DACH**, **11**) dimolybdenum *tetrakis*( $\mu$ -pivalate) **Mo2** complexes.

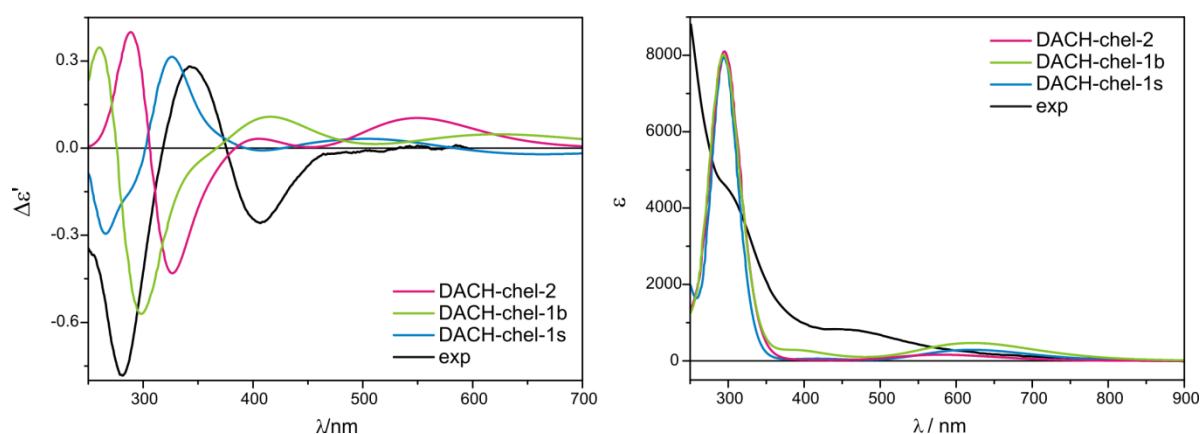

**Figure S31.** Comparison of the B3LYP calculated ECD (left) and UV-Vis (right) spectra of chelated (chel) (1*S*,2*S*)-diaminocyclohexane (**DACH**, **11**) dimolybdenum *tetrakis*( $\mu$ -pivalate) **Mo2** complexes with experimental data (**11**+**Mo2**, 1.5:1 ligand-to-complex molar ratio, recorded in chloroform immediately after dissolving).

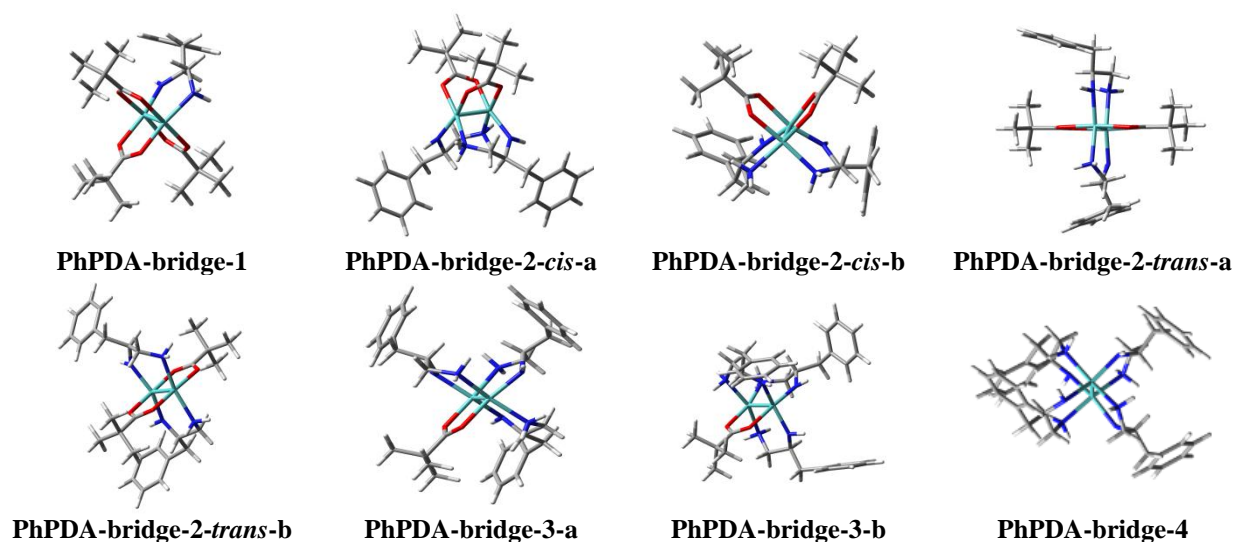

**Figure S32.** Optimized structures of bridged 3-phenyl-propane-1,2-diamine (**PhPDA**, **13**) dimolybdenum *tetrakis*( $\mu$ -pivalate) **Mo2** complexes.

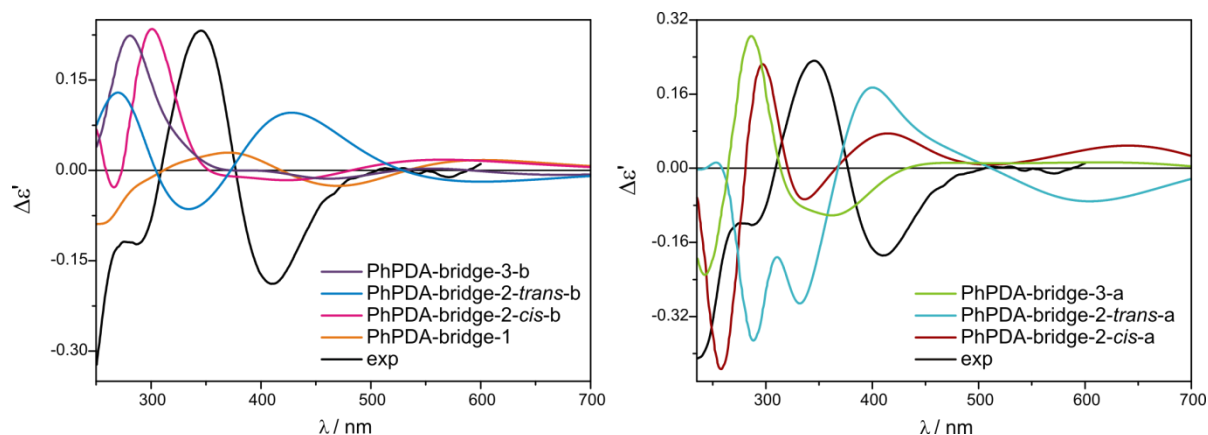

**Figure S33.** Comparison of the CAM-B3LYP calculated ECD spectra of bridge 3-phenyl-propane-1,2-diamine (**PhPDA**, **13**) dimolybdenum *tetrakis*( $\mu$ -pivalate) **Mo2** complexes with experimental data (**13**+**Mo2**, 1.5:1 ligand-to-complex molar ratio, recorded in chloroform immediately after dissolving).

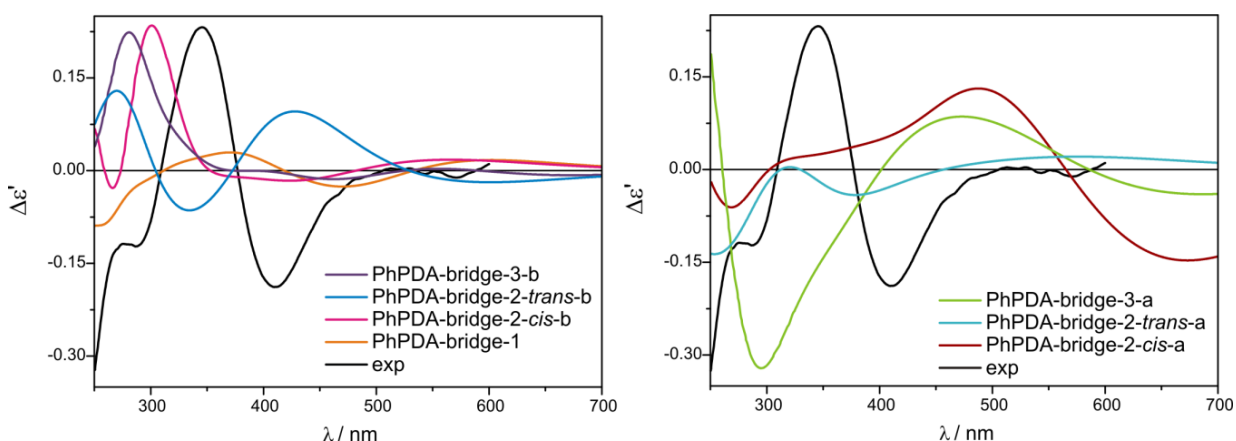

**Figure S34** Comparison of the B3LYP calculated ECD spectra of bridged 3-phenyl-propane-1,2-diamine (**PhPDA**, **13**) dimolybdenum *tetrakis*( $\mu$ -pivalate) **Mo2** complexes with experimental data (**13**+**Mo2**, 1.5:1 ligand-to-complex molar ratio, recorded in chloroform immediately after dissolving).

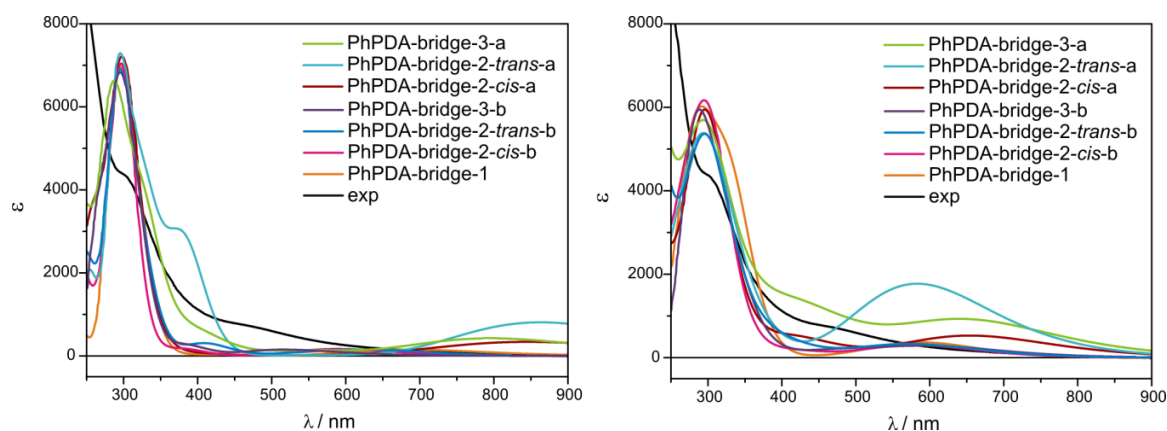

**Figure S35.** Comparison of UV-Vis spectra of the CAM-B3LYP (left) and B3LYP (right) of bridge 3-phenyl-propane-1,2-diamine (**PhPDA**, **13**) dimolybdenum *tetrakis*( $\mu$ -pivalate) **Mo2** complexes with experimental data (**13**+**Mo2**, 1.5:1 ligand-to-complex molar ratio, recorded in chloroform immediately after dissolving).



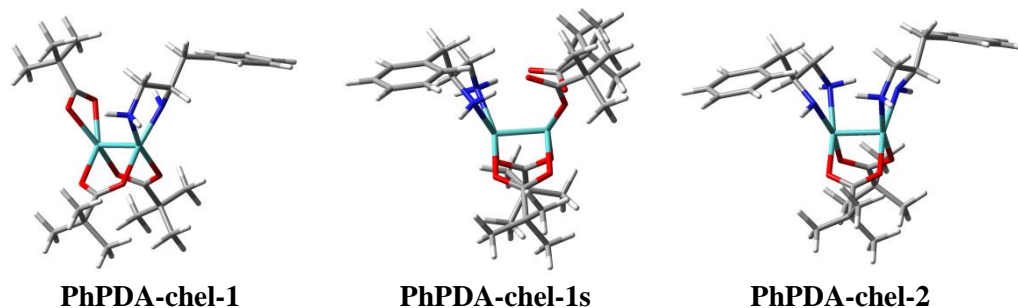

**Figure S36.** Optimized structures of selected mono- and disubstituted chelated (chel) 3-phenyl-propane-1,2-diamine (**PhPDA**, **13**) dimolybdenum *tetrakis*( $\mu$ -pivalate) **Mo2** complexes.

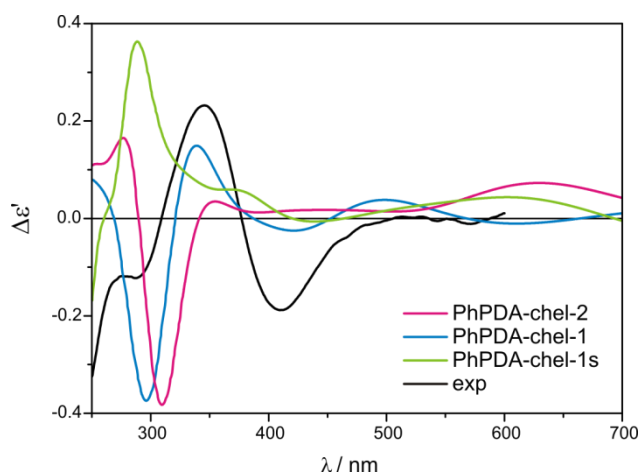

**Figure S37.** Comparison of the CAM-B3LYP calculated ECD spectra of chelated 3-phenyl-propane-1,2-diamine (**PhPDA**, **13**) dimolybdenum *tetrakis*( $\mu$ -pivalate) **Mo2** complexes with experimental data (**13**+**Mo2**, 1.5:1 ligand-to-complex molar ratio, recorded in chloroform immediately after dissolving).

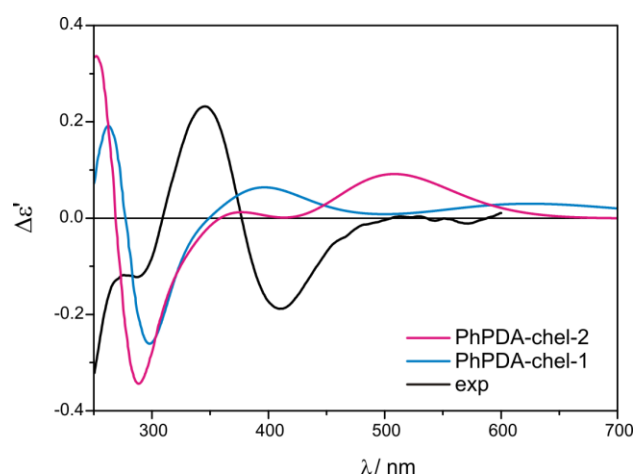

**Figure S38.** Comparison of the B3LYP calculated ECD spectra of chelated (chel) 3-phenyl-propane-1,2-diamine (**PhPDA**, **13**) dimolybdenum *tetrakis*( $\mu$ -pivalate) **Mo2** complexes with experimental data (**13**+**Mo2**, 1.5:1 ligand-to-complex molar ratio, recorded in chloroform immediately after dissolving).

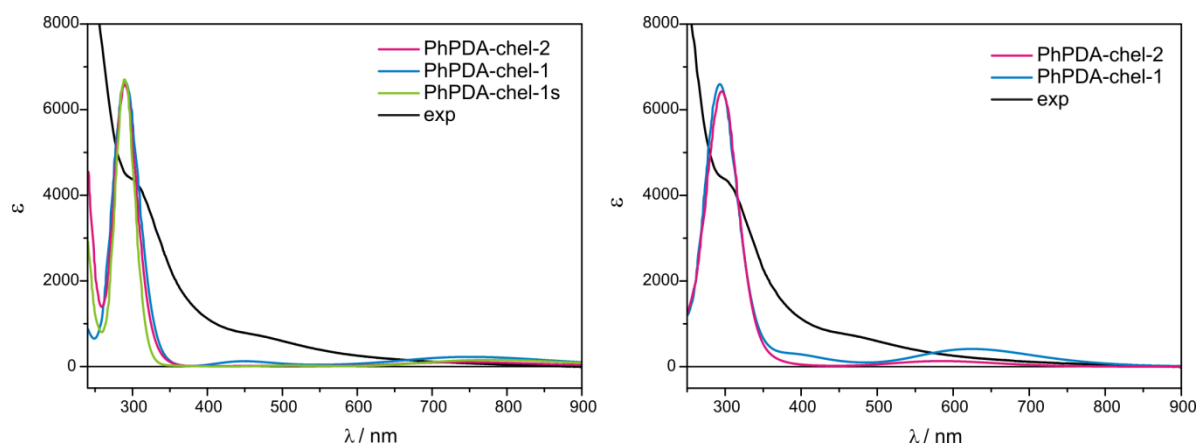

**Figure S39.** Comparison of UV-Vis spectra of the CAM-B3LYP (left) and B3LYP (right) of chelated 3-phenyl-propane-1,2-diamine (**PhPDA**, **13**) dimolybdenum *tetrakis*( $\mu$ -pivalate) **Mo2** complexes with experimental data (**13**+**Mo2**, 1.5:1 ligand-to-complex molar ratio, recorded in chloroform immediately after dissolving).

**Table 2SI.** The Cartesian Coordinates of Alanine (Ala) substituted dimolybdenum *tetrakis*( $\mu$ -pivalate) **Mo<sub>2</sub>** complexes.

| Ala-bridge-1 |             |             |             | Ala-bridge-2cis-b |             |             |             |
|--------------|-------------|-------------|-------------|-------------------|-------------|-------------|-------------|
| Mo           | -0.01411800 | -0.09330200 | -1.09089600 | Mo                | -0.03762700 | -0.22533900 | -1.05475600 |
| O            | -2.13263000 | -0.36807700 | -1.14069200 | O                 | -1.54350400 | 1.28337300  | -1.03855500 |
| O            | 2.10671700  | 0.17661100  | -1.13977500 | O                 | 1.47100500  | 1.28384200  | -1.14565900 |
| O            | -0.28837700 | 2.02445800  | -1.06127900 | C                 | -1.95406400 | 1.72692000  | 0.09062600  |
| C            | -2.75480700 | -0.50084400 | -0.02921300 | C                 | -3.02946000 | 2.81597200  | 0.10827200  |
| C            | -4.26064000 | -0.77562900 | -0.05003700 | Mo                | 0.03730600  | -0.23993800 | 1.07233500  |
| Mo           | -0.00469500 | -0.16605100 | 1.03325000  | C                 | 1.95424700  | 1.72810900  | -0.04611800 |
| C            | 2.73766400  | 0.23130700  | -0.02849000 | O                 | -1.47058200 | 1.27115200  | 1.18291500  |
| C            | -0.37649200 | 2.61081500  | 0.07364700  | O                 | 1.54392800  | 1.27155600  | 1.07517200  |
| O            | -2.12451000 | -0.44233600 | 1.08221100  | C                 | 3.03413000  | 2.81180200  | -0.09625000 |
| O            | 2.11499800  | 0.10239300  | 1.08312800  | C                 | 4.25217300  | 2.24638500  | -0.86469000 |
| O            | -0.27953700 | 1.94292800  | 1.16027900  | H                 | 5.03512900  | 3.01158600  | -0.92494400 |
| C            | 4.24635800  | 0.49047200  | -0.00666800 | H                 | 4.67255500  | 1.37148200  | -0.35448400 |
| C            | -0.61420300 | 4.12256100  | 0.10717100  | H                 | 3.97763300  | 1.95332400  | -1.88285500 |
| C            | 4.46500600  | 1.92086400  | 0.54672700  | C                 | 2.46539900  | 4.03331400  | -0.85568700 |
| H            | 4.06358300  | 2.01943000  | 1.56060300  | H                 | 1.59109100  | 4.44939800  | -0.34080400 |
| H            | 5.53874200  | 2.14101800  | 0.57859400  | H                 | 3.22938900  | 4.81765700  | -0.91299300 |
| H            | 3.98394900  | 2.67205400  | -0.09099600 | H                 | 2.16986700  | 3.76482500  | -1.87462100 |
| C            | 4.84253200  | 0.38477800  | -1.42083200 | C                 | 3.45953900  | 3.22979600  | 1.32153800  |
| H            | 5.92145400  | 0.57466300  | -1.37612800 | H                 | 3.87146400  | 2.38481100  | 1.88323000  |
| H            | 4.69041900  | -0.61353400 | -1.84586300 | H                 | 4.23191400  | 4.00519900  | 1.25603300  |
| H            | 4.39487200  | 1.11515600  | -2.10218200 | H                 | 2.61648400  | 3.63597600  | 1.89057300  |
| C            | 4.92486600  | -0.53367500 | 0.92929900  | C                 | -2.46701800 | 4.06091500  | -0.61854300 |
| H            | 4.77917900  | -1.55885700 | 0.56816300  | H                 | -1.57784700 | 4.45088700  | -0.10875800 |
| H            | 6.00302500  | -0.33806400 | 0.96672600  | H                 | -2.19716100 | 3.82770800  | -1.65332200 |
| H            | 4.52682600  | -0.46760000 | 1.94622000  | H                 | -3.22544700 | 4.85267100  | -0.62968400 |
| C            | 0.51454600  | 4.81675400  | -0.68961400 | C                 | -3.41631400 | 3.18390000  | 1.55058900  |
| H            | 0.34947400  | 5.90069700  | -0.69055500 | H                 | -4.18617100 | 3.96433800  | 1.53307800  |
| H            | 1.49545000  | 4.62394300  | -0.23879600 | H                 | -3.81864100 | 2.32047200  | 2.09109500  |
| H            | 0.53819000  | 4.47066900  | -1.72753600 | H                 | -2.55714100 | 3.56492500  | 2.11251400  |
| C            | -1.97578100 | 4.40897200  | -0.57087400 | C                 | -4.27015600 | 2.29131400  | -0.65166700 |
| H            | -2.79817200 | 3.92171800  | -0.03344900 | H                 | -4.68581300 | 1.40005300  | -0.16643300 |
| H            | -2.16479700 | 5.48904100  | -0.57152400 | H                 | -5.04765500 | 3.06431500  | -0.66252800 |
| H            | -1.98427500 | 4.05714500  | -1.60727200 | H                 | -4.02285100 | 2.03672800  | -1.68688100 |
| C            | -0.63229300 | 4.64533700  | 1.55342900  | C                 | 4.40920200  | -2.57184200 | -0.32474700 |
| H            | 0.32017300  | 4.45712400  | 2.06036400  | C                 | 3.04839300  | -3.26226600 | -0.12614900 |
| H            | -0.80704300 | 5.72769600  | 1.54692900  | C                 | 1.94788500  | -2.19891700 | -0.07126400 |
| H            | -1.42762300 | 4.17496900  | 2.14092900  | O                 | 1.47062600  | -1.75043500 | -1.16941400 |
| C            | -4.94682900 | 0.20507700  | -1.02530700 | O                 | 1.54824100  | -1.76081500 | 1.05948600  |
| H            | -4.81468600 | 1.24445500  | -0.70153000 | N                 | 3.10046600  | -4.14328100 | 1.04211000  |
| H            | -4.54357700 | 0.10697400  | -2.03749400 | H                 | 5.18787400  | -3.33116100 | -0.44822800 |
| H            | -6.02242600 | -0.00457100 | -1.05972100 | H                 | 4.40030700  | -1.92913800 | -1.21075200 |
| C            | -4.86500800 | -0.62703000 | 1.35691800  | H                 | 4.66142400  | -1.95551300 | 0.54684000  |
| H            | -5.94142900 | -0.83103000 | 1.31434500  | H                 | 2.83991500  | -3.88113300 | -1.00558500 |
| H            | -4.41193200 | -1.32721300 | 2.06564100  | H                 | 2.21614800  | -4.63893800 | 1.14948500  |
| H            | -4.72655600 | 0.38764600  | 1.74670900  | H                 | 3.21356100  | -3.58480700 | 1.88800000  |
| C            | -4.45859300 | -2.22812200 | -0.55222500 | C                 | -4.41153400 | -2.57187500 | 0.32699700  |
| H            | -3.97518900 | -2.94975200 | 0.11703500  | C                 | -3.05316200 | -3.26036100 | 0.10599800  |
| H            | -5.52953100 | -2.46138100 | -0.58515400 | C                 | -1.95133600 | -2.19772800 | 0.06334900  |
| H            | -4.04724900 | -2.35944800 | -1.55851500 | O                 | -1.47416200 | -1.76290900 | 1.16653200  |
| C            | 2.11822100  | -4.61930300 | -0.42529500 | O                 | -1.55003400 | -1.74681400 | -1.06170000 |
| C            | 0.61487600  | -4.37907500 | -0.19869400 | N                 | -3.11425800 | -4.12019900 | -1.07735500 |
| C            | 0.35314500  | -2.87196000 | -0.12764800 | H                 | -5.19063400 | -3.33228100 | 0.44064100  |
| O            | 0.25707200  | -2.21378600 | -1.22009600 | H                 | -4.39557000 | -1.94695500 | 1.22554400  |

|                          |             |             |             |                            |             |             |             |
|--------------------------|-------------|-------------|-------------|----------------------------|-------------|-------------|-------------|
| O                        | 0.26841500  | -2.29669900 | 1.00871000  | H                          | -4.66855600 | -1.93791400 | -0.53041200 |
| N                        | 0.15887300  | -5.13196600 | 0.97093100  | H                          | -2.83965900 | -3.89533400 | 0.97272400  |
| H                        | 2.30012600  | -5.69048300 | -0.55828000 | H                          | -2.23121900 | -4.61473200 | -1.19936500 |
| H                        | 2.47276800  | -4.08865100 | -1.31447200 | H                          | -3.23208800 | -3.54669800 | -1.91246000 |
| H                        | 2.69983100  | -4.27392200 | 0.43826600  |                            |             |             |             |
| H                        | 0.06799000  | -4.74996700 | -1.07253300 |                            |             |             |             |
| H                        | -0.84447000 | -5.00719100 | 1.10054200  |                            |             |             |             |
| H                        | 0.59833700  | -4.75790600 | 1.81189600  |                            |             |             |             |
| <b>Ala-bridge-2trans</b> |             |             |             | <b>Ala-bridge-2trans-b</b> |             |             |             |
| Mo                       | 0.00798300  | -0.00158500 | 1.11959400  | Mo                         | -0.05204200 | -0.06827400 | 1.06391000  |
| O                        | 2.12124900  | -0.31205200 | 1.15362200  | O                          | 2.08141100  | -0.01379700 | 1.09752200  |
| O                        | -2.10510200 | 0.30730400  | 1.18373400  | O                          | -2.18706700 | -0.13177400 | 1.12847000  |
| C                        | 2.73821900  | -0.41937000 | 0.03638400  | C                          | 2.70606600  | 0.07275400  | -0.01747800 |
| C                        | 4.23897200  | -0.72047400 | 0.04675700  | C                          | 4.23663800  | 0.09366900  | -0.00572700 |
| Mo                       | -0.00619000 | 0.00517100  | -1.00585400 | Mo                         | -0.07164300 | 0.06749900  | -1.05751800 |
| C                        | -2.73674800 | 0.42046000  | 0.07725000  | C                          | -2.82964500 | -0.07668400 | 0.02388800  |
| O                        | 2.10676900  | -0.30604500 | -1.07020500 | O                          | 2.06348100  | 0.12762600  | -1.12210000 |
| O                        | -2.11945800 | 0.31573300  | -1.04005500 | O                          | -2.20520500 | 0.01376700  | -1.09094900 |
| C                        | -4.23905900 | 0.71373000  | 0.06633000  | C                          | -4.36009500 | -0.10268600 | 0.01211400  |
| C                        | -4.94684000 | -0.32619900 | -0.83111700 | C                          | -4.82894800 | -1.24328500 | -0.92023800 |
| H                        | -4.81679900 | -1.34237000 | -0.43981500 | H                          | -4.48141100 | -2.21904600 | -0.55986200 |
| H                        | -6.02143100 | -0.11110200 | -0.86405900 | H                          | -5.92470800 | -1.26481700 | -0.95099300 |
| H                        | -4.55815400 | -0.29847500 | -1.85357300 | H                          | -4.45802000 | -1.10054000 | -1.93977000 |
| C                        | -4.82064200 | 0.66171400  | 1.48924600  | C                          | -4.91790600 | -0.32137600 | 1.42858400  |
| H                        | -4.34839900 | 1.40099900  | 2.14421100  | H                          | -4.60769600 | 0.47691700  | 2.11061400  |
| H                        | -5.89525300 | 0.87579800  | 1.45107200  | H                          | -6.01358000 | -0.33221600 | 1.39061400  |
| H                        | -4.68655900 | -0.32692100 | 1.94156800  | H                          | -4.58258200 | -1.27570000 | 1.84897000  |
| C                        | -4.43737500 | 2.12990800  | -0.52832400 | C                          | -4.85571300 | 1.25488300  | -0.54251600 |
| H                        | -4.04528800 | 2.18991100  | -1.54864500 | H                          | -4.48045700 | 1.42971200  | -1.55586600 |
| H                        | -5.50703100 | 2.36940300  | -0.55543100 | H                          | -5.95171700 | 1.25957000  | -0.57484500 |
| H                        | -3.93553500 | 2.89100500  | 0.08116600  | H                          | -4.53242100 | 2.08646700  | 0.09509000  |
| C                        | 4.95023200  | 0.29107300  | 0.97281500  | C                          | 4.70969700  | 1.23710000  | 0.92100400  |
| H                        | 4.55700400  | 0.24064300  | 1.99258000  | H                          | 4.33816200  | 1.10067600  | 1.94119200  |
| H                        | 6.02308500  | 0.06739600  | 1.00460900  | H                          | 5.80554100  | 1.25438100  | 0.95184000  |
| H                        | 4.82912000  | 1.31768900  | 0.60679800  | H                          | 4.36602200  | 2.21237700  | 0.55591000  |
| C                        | 4.82694000  | -0.63712800 | -1.37210500 | C                          | 4.79519200  | 0.30350900  | -1.42325500 |
| H                        | 5.90039400  | -0.85704200 | -1.33457900 | H                          | 5.89089500  | 0.31099300  | -1.38524000 |
| H                        | 4.35414400  | -1.35809900 | -2.04667100 | H                          | 4.48252300  | -0.49720300 | -2.10132000 |
| H                        | 4.69941000  | 0.36288600  | -1.80089700 | H                          | 4.46296600  | 1.25677600  | -1.84841700 |
| C                        | 4.42474300  | -2.15287500 | 0.60622700  | C                          | 4.72775500  | -1.26265600 | 0.55588700  |
| H                        | 5.49269500  | -2.39992300 | 0.63313300  | H                          | 5.82378100  | -1.27133800 | 0.58668000  |
| H                        | 4.02650200  | -2.23632500 | 1.62257700  | H                          | 4.35327100  | -1.43009900 | 1.57076300  |
| H                        | 3.92145800  | -2.89484400 | -0.02519600 | H                          | 4.40007900  | -2.09670500 | -0.07611600 |
| C                        | -2.16843000 | -4.47702500 | 0.36379600  | C                          | 1.27666700  | 4.78667800  | 0.58128200  |
| C                        | -0.67735100 | -4.24229700 | 0.06225300  | C                          | -0.15084700 | 4.28420700  | 0.30211900  |
| C                        | -0.39768700 | -2.73658600 | 0.04883400  | C                          | -0.13644500 | 2.75761500  | 0.18161000  |
| O                        | -0.28995900 | -2.12420500 | 1.16624300  | O                          | -0.11300500 | 2.05975100  | 1.25314800  |
| O                        | -0.30773300 | -2.11682400 | -1.06391200 | O                          | -0.12502400 | 2.20936400  | -0.97151600 |
| N                        | -0.29790700 | -4.94422000 | -1.16425800 | N                          | -0.71076600 | 4.98087300  | -0.85661700 |
| H                        | -2.35598500 | -5.55132500 | 0.45744800  | H                          | 1.25451000  | 5.86732100  | 0.75429200  |
| H                        | -2.46446900 | -3.98473500 | 1.29524100  | H                          | 1.70110600  | 4.29723500  | 1.46336100  |
| H                        | -2.79403600 | -4.08610100 | -0.44807000 | H                          | 1.93265200  | 4.58642700  | -0.27468200 |
| H                        | -0.08749200 | -4.66022100 | 0.88582300  | H                          | -0.77641600 | 4.51930800  | 1.17051500  |
| H                        | 0.69766100  | -4.82247600 | -1.34576900 | H                          | -1.67130200 | 4.67990000  | -1.01743500 |
| H                        | -0.77993800 | -4.52815600 | -1.96101600 | H                          | -0.19243400 | 4.72272800  | -1.69620300 |
| C                        | 2.19517000  | 4.46641700  | 0.30000500  | C                          | 1.49234600  | -4.70328400 | -0.71049400 |
| C                        | 0.68813300  | 4.24388500  | 0.07931600  | C                          | 0.06961400  | -4.28403000 | -0.30008400 |
| C                        | 0.40153700  | 2.73981500  | 0.06157500  | C                          | 0.00469200  | -2.75860100 | -0.17529800 |

|                     |             |             |             |                     |             |             |             |
|---------------------|-------------|-------------|-------------|---------------------|-------------|-------------|-------------|
| O                   | 0.30578800  | 2.12044200  | 1.17631000  | O                   | -0.02212000 | -2.06050900 | -1.24671100 |
| O                   | 0.29727900  | 2.12742400  | -1.05402700 | O                   | -0.00012900 | -2.21043000 | 0.97766300  |
| N                   | 0.24591900  | 4.96264900  | -1.11642800 | N                   | -0.34257300 | -5.01360900 | 0.89898100  |
| H                   | 2.39459400  | 5.53823400  | 0.39768900  | H                   | 1.51689100  | -5.78353700 | -0.88532200 |
| H                   | 2.54003200  | 3.95978600  | 1.20677800  | H                   | 1.80522200  | -4.19044600 | -1.62502400 |
| H                   | 2.77167700  | 4.08313100  | -0.55086600 | H                   | 2.21105400  | -4.46481500 | 0.08314600  |
| H                   | 0.14685600  | 4.65416100  | 0.93898100  | H                   | -0.61678600 | -4.55519200 | -1.11063400 |
| H                   | -0.75923000 | 4.85038100  | -1.24323100 | H                   | -1.29783200 | -4.76388300 | 1.15190200  |
| H                   | 0.68003000  | 4.55257400  | -1.94325400 | H                   | 0.23766700  | -4.73245800 | 1.68920900  |
| <b>Ala-bridge-3</b> |             |             |             | <b>Ala-bridge-4</b> |             |             |             |
| Mo                  | -0.01411800 | -0.09330200 | -1.09089600 | Mo                  | 0.00002700  | -0.00002500 | 1.19195100  |
| O                   | -2.13263000 | -0.36807700 | -1.14069200 | Mo                  | -0.00001500 | -0.00000500 | -0.93408500 |
| O                   | 2.10671700  | 0.17661100  | -1.13977500 | C                   | -2.83768200 | 4.09567600  | 0.31012400  |
| O                   | -0.28837700 | 2.02445800  | -1.06127900 | C                   | -3.36750200 | 2.66080200  | 0.13983400  |
| C                   | -2.75480700 | -0.50084400 | -0.02921300 | C                   | -2.18626800 | 1.68730500  | 0.12741900  |
| C                   | -4.26064000 | -0.77562900 | -0.05003700 | O                   | -1.69494200 | 1.30049500  | 1.24329300  |
| Mo                  | -0.00469500 | -0.16605100 | 1.03325000  | O                   | -1.69379000 | 1.30251200  | -0.98679300 |
| C                   | 2.73766400  | 0.23130700  | -0.02849000 | N                   | -4.23119800 | 2.58244100  | -1.03912400 |
| C                   | -0.37649200 | 2.61081500  | 0.07364700  | H                   | -3.68203500 | 4.78628300  | 0.40100900  |
| O                   | -2.12451000 | -0.44233600 | 1.08221100  | H                   | -2.21379900 | 4.18237600  | 1.20534800  |
| O                   | 2.11499800  | 0.10239300  | 1.08312800  | H                   | -2.23877100 | 4.39314000  | -0.55934200 |
| O                   | -0.27953700 | 1.94292800  | 1.16027900  | H                   | -3.97126500 | 2.40627100  | 1.01768100  |
| C                   | 4.24635800  | 0.49047200  | -0.00666800 | H                   | -4.61979900 | 1.64450800  | -1.12969200 |
| C                   | -0.61420300 | 4.12256100  | 0.10717100  | H                   | -3.67873000 | 2.74060100  | -1.88165400 |
| C                   | 4.46500600  | 1.92086400  | 0.54672700  | C                   | 2.83779300  | -4.09568000 | 0.30986300  |
| H                   | 4.06358300  | 2.01943000  | 1.56060300  | C                   | 3.36753500  | -2.66077700 | 0.13957600  |
| H                   | 5.53874200  | 2.14101800  | 0.57859400  | C                   | 2.18626700  | -1.68734000 | 0.12729900  |
| H                   | 3.98394900  | 2.67205400  | -0.09099600 | O                   | 1.69500500  | -1.30055000 | 1.24320900  |
| C                   | 4.84253200  | 0.38477800  | -1.42083200 | O                   | 1.69375400  | -1.30251500 | -0.98688000 |
| H                   | 5.92145400  | 0.57466300  | -1.37612800 | N                   | 4.23111100  | -2.58233000 | -1.03946400 |
| H                   | 4.69041900  | -0.61353400 | -1.84586300 | H                   | 3.68219200  | -4.78624800 | 0.40064600  |
| H                   | 4.39487200  | 1.11515600  | -2.10218200 | H                   | 2.21399400  | -4.18244600 | 1.20513800  |
| C                   | 4.92486600  | -0.53367500 | 0.92929900  | H                   | 2.23881600  | -4.39313700 | -0.55956700 |
| H                   | 4.77917900  | -1.55885700 | 0.56816300  | H                   | 3.97137300  | -2.40625200 | 1.01737300  |
| H                   | 6.00302500  | -0.33806400 | 0.96672600  | H                   | 4.61965700  | -1.64437800 | -1.13002500 |
| H                   | 4.52682600  | -0.46760000 | 1.94622000  | H                   | 3.67855800  | -2.74047700 | -1.88193500 |
| C                   | 0.51454600  | 4.81675400  | -0.68961400 | C                   | -4.09571600 | -2.83740900 | 0.31013800  |
| H                   | 0.34947400  | 5.90069700  | -0.69055500 | C                   | -2.66091000 | -3.36743000 | 0.13984400  |
| H                   | 1.49545000  | 4.62394300  | -0.23879600 | C                   | -1.68729200 | -2.18629500 | 0.12737200  |
| H                   | 0.53819000  | 4.47066900  | -1.72753600 | O                   | -1.30050900 | -1.69498700 | 1.24325200  |
| C                   | -1.97578100 | 4.40897200  | -0.57087400 | O                   | -1.30254000 | -1.69377300 | -0.98682400 |
| H                   | -2.79817200 | 3.92171800  | -0.03344900 | N                   | -2.58263500 | -4.23120000 | -1.03906600 |
| H                   | -2.16479700 | 5.48904100  | -0.57152400 | H                   | -4.78644200 | -3.68165400 | 0.40107300  |
| H                   | -1.98427500 | 4.05714500  | -1.60727200 | H                   | -4.18230400 | -2.21347600 | 1.20533600  |
| C                   | -0.63229300 | 4.64533700  | 1.55342900  | H                   | -4.39311800 | -2.23848800 | -0.55934400 |
| H                   | 0.32017300  | 4.45712400  | 2.06036400  | H                   | -2.40643500 | -3.97118800 | 1.01771900  |
| H                   | -0.80704300 | 5.72769600  | 1.54692900  | H                   | -1.64474200 | -4.61991700 | -1.12963000 |
| H                   | -1.42762300 | 4.17496900  | 2.14092900  | H                   | -2.74073800 | -3.67877900 | -1.88163900 |
| C                   | -4.94682900 | 0.20507700  | -1.02530700 | C                   | 4.09572000  | 2.83754700  | 0.30996800  |
| H                   | -4.81468600 | 1.24445500  | -0.70153000 | C                   | 2.66087300  | 3.36746100  | 0.13974300  |
| H                   | -4.54357700 | 0.10697400  | -2.03749400 | C                   | 1.68731900  | 2.18626700  | 0.12734900  |
| H                   | -6.02242600 | -0.00457100 | -1.05972100 | O                   | 1.30055600  | 1.69493900  | 1.24324000  |
| C                   | -4.86500800 | -0.62703000 | 1.35691800  | O                   | 1.30250700  | 1.69376700  | -0.98684300 |
| H                   | -5.94142900 | -0.83103000 | 1.31434500  | N                   | 2.58249900  | 4.23119000  | -1.03919300 |
| H                   | -4.41193200 | -1.32721300 | 2.06564100  | H                   | 4.78638300  | 3.68185300  | 0.40084300  |
| H                   | -4.72655600 | 0.38764600  | 1.74670900  | H                   | 4.18241000  | 2.21364300  | 1.20517700  |
| C                   | -4.45859300 | -2.22812200 | -0.55222500 | H                   | 4.39311600  | 2.23863100  | -0.55951800 |
| H                   | -3.97518900 | -2.94975200 | 0.11703500  | H                   | 2.40640900  | 3.97122500  | 1.01761400  |

|                   |             |             |             |                    |             |             |             |
|-------------------|-------------|-------------|-------------|--------------------|-------------|-------------|-------------|
| H                 | -5.52953100 | -2.46138100 | -0.58515400 | H                  | 1.64458400  | 4.61985000  | -1.12972000 |
| H                 | -4.04724900 | -2.35944800 | -1.55851500 | H                  | 2.74059200  | 3.67873600  | -1.88174600 |
| C                 | 2.11822100  | -4.61930300 | -0.42529500 |                    |             |             |             |
| C                 | 0.61487600  | -4.37907500 | -0.19869400 |                    |             |             |             |
| C                 | 0.35314500  | -2.87196000 | -0.12764800 |                    |             |             |             |
| O                 | 0.25707200  | -2.21378600 | -1.22009600 |                    |             |             |             |
| O                 | 0.26841500  | -2.29669900 | 1.00871000  |                    |             |             |             |
| N                 | 0.15887300  | -5.13196600 | 0.97093100  |                    |             |             |             |
| H                 | 2.30012600  | -5.69048300 | -0.55828000 |                    |             |             |             |
| H                 | 2.47276800  | -4.08865100 | -1.31447200 |                    |             |             |             |
| H                 | 2.69983100  | -4.27392200 | 0.43826600  |                    |             |             |             |
| H                 | 0.06799000  | -4.74996700 | -1.07253300 |                    |             |             |             |
| H                 | -0.84447000 | -5.00719100 | 1.10054200  |                    |             |             |             |
| H                 | 0.59833700  | -4.75790600 | 1.81189600  |                    |             |             |             |
| <b>Ala-chel-1</b> |             |             |             | <b>Ala-chel-1a</b> |             |             |             |
| Mo                | -0.03714400 | -0.22134100 | -0.94354200 | Mo                 | 0.06946500  | -0.19989000 | -1.01559200 |
| O                 | 1.82021000  | -1.43652800 | -1.23057900 | O                  | -1.82680700 | 0.71591700  | -1.76157000 |
| O                 | -1.56129300 | -1.66501000 | -0.84973500 | O                  | 1.48995700  | 1.28174700  | -1.43579000 |
| C                 | -2.12944700 | -1.90819000 | 0.27119200  | C                  | 2.00510700  | 1.95070700  | -0.47335800 |
| C                 | -3.14684000 | -3.03874200 | 0.40742400  | C                  | 2.97441200  | 3.09923900  | -0.74280600 |
| Mo                | -0.28480400 | 0.21577700  | 1.13848800  | Mo                 | 0.24083300  | 0.18704800  | 1.08408000  |
| O                 | -1.80521300 | -1.21959000 | 1.30378200  | O                  | 1.67030100  | 1.67484000  | 0.73424500  |
| O                 | 1.84269200  | 0.70003500  | -1.70354500 | O                  | -1.75975100 | -1.43177500 | -1.34359200 |
| C                 | 2.45174900  | -0.42690400 | -1.69866300 | C                  | -2.41504700 | -0.42019000 | -1.77780600 |
| C                 | 3.85174100  | -0.56246200 | -2.29193700 | C                  | -3.83711100 | -0.58885200 | -2.30691900 |
| O                 | -1.45171800 | 1.23765300  | -1.45274500 | O                  | 1.59811800  | -1.63681000 | -0.90270200 |
| O                 | -1.70749400 | 1.68246000  | 0.69667500  | O                  | 1.75592400  | -1.24556800 | 1.27018400  |
| C                 | -2.00596800 | 1.92485600  | -0.52671400 | C                  | 2.12104400  | -1.90796300 | 0.23398400  |
| C                 | -3.00504700 | 3.03221000  | -0.85279600 | C                  | 3.13554500  | -3.03906300 | 0.38576600  |
| C                 | 4.57357800  | -1.78593900 | -1.69841300 | C                  | -4.43508200 | 0.76789300  | -2.71482800 |
| H                 | 4.69767900  | -1.68827600 | -0.61390600 | H                  | -4.48016200 | 1.45819000  | -1.86569000 |
| H                 | 4.02450400  | -2.71140300 | -1.89628900 | H                  | -3.84879500 | 1.24370700  | -3.50791500 |
| H                 | 5.56993100  | -1.87445600 | -2.14718000 | H                  | -5.45534000 | 0.61876900  | -3.08752100 |
| C                 | 4.66358500  | 0.72020900  | -2.02274100 | C                  | -4.69725800 | -1.23605300 | -1.19682600 |
| H                 | 5.65728900  | 0.62553200  | -2.47600900 | H                  | -5.71786600 | -1.38728700 | -1.56757100 |
| H                 | 4.17307400  | 1.60070600  | -2.44786100 | H                  | -4.29154300 | -2.20656500 | -0.89536600 |
| H                 | 4.79689000  | 0.88901700  | -0.94780800 | H                  | -4.75137100 | -0.59371400 | -0.30984400 |
| C                 | 3.67200600  | -0.75135500 | -3.82088400 | C                  | -3.78003500 | -1.53178500 | -3.53306500 |
| H                 | 3.16347000  | 0.10856100  | -4.27052600 | H                  | -3.36756400 | -2.50903100 | -3.26333700 |
| H                 | 4.65686400  | -0.85128600 | -4.29219900 | H                  | -4.79278800 | -1.68071500 | -3.92568000 |
| H                 | 3.09378700  | -1.65494000 | -4.04550400 | H                  | -3.16559400 | -1.10540300 | -4.33511200 |
| C                 | -4.41331700 | -2.49699200 | 1.10731600  | C                  | 4.21572600  | 2.93316500  | 0.16229900  |
| H                 | -5.13871400 | -3.30972200 | 1.22987200  | H                  | 4.90735500  | 3.76607700  | -0.00967400 |
| H                 | -4.17910400 | -2.09213800 | 2.09651900  | H                  | 3.93863700  | 2.92797600  | 1.22076800  |
| H                 | -4.88726600 | -1.70619300 | 0.51373000  | H                  | 4.74693700  | 1.99999700  | -0.06005300 |
| C                 | -3.51182600 | -3.61156000 | -0.97305100 | C                  | 3.39988000  | 3.11594600  | -2.22125700 |
| H                 | -2.63379100 | -4.01835400 | -1.48471800 | H                  | 2.54053300  | 3.24679000  | -2.88644800 |
| H                 | -4.24095400 | -4.42059600 | -0.84891500 | H                  | 4.09343600  | 3.94782900  | -2.38990900 |
| H                 | -3.95791000 | -2.84751000 | -1.61915800 | H                  | 3.90860900  | 2.18703600  | -2.50174900 |
| C                 | -2.50336000 | -4.14459700 | 1.28117600  | C                  | 2.24731500  | 4.42078000  | -0.38937600 |
| H                 | -1.59343600 | -4.54073100 | 0.81496200  | H                  | 1.35440800  | 4.56200700  | -1.00980500 |
| H                 | -2.24618000 | -3.76529800 | 2.27544300  | H                  | 1.94460900  | 4.43764500  | 0.66271000  |
| H                 | -3.21134900 | -4.97305400 | 1.40088300  | H                  | 2.92145300  | 5.26687700  | -0.56729000 |
| C                 | -4.35654700 | 2.67429000  | -0.18887800 | C                  | 4.37922000  | -2.50228900 | 1.12979600  |
| H                 | -4.25262500 | 2.57848200  | 0.89649000  | H                  | 4.11391500  | -2.10999400 | 2.11623800  |
| H                 | -5.08660600 | 3.46515100  | -0.39726200 | H                  | 5.10298000  | -3.31453500 | 1.26462800  |
| H                 | -4.75551600 | 1.73206400  | -0.58301600 | H                  | 4.86852200  | -1.70311200 | 0.56036400  |
| C                 | -3.18949800 | 3.16924200  | -2.37377600 | C                  | 3.54292500  | -3.59435700 | -0.98974900 |

|                    |             |             |             |                    |             |             |             |
|--------------------|-------------|-------------|-------------|--------------------|-------------|-------------|-------------|
| H                  | -3.91061200 | 3.96842300  | -2.58083500 | H                  | 4.26899400  | -4.40415700 | -0.85329300 |
| H                  | -2.24758900 | 3.42221200  | -2.87191100 | H                  | 2.68130700  | -3.99591200 | -1.53263200 |
| H                  | -3.57020700 | 2.24318900  | -2.81728100 | H                  | 4.00737600  | -2.82217100 | -1.61274800 |
| C                  | -2.47352800 | 4.35968000  | -0.26255000 | C                  | 2.47017400  | -4.15660400 | 1.22751100  |
| H                  | -3.18592800 | 5.16511100  | -0.47585000 | H                  | 3.17694600  | -4.98437300 | 1.35855000  |
| H                  | -2.34770000 | 4.28908000  | 0.82232400  | H                  | 2.18272900  | -3.78941200 | 2.21798700  |
| H                  | -1.50884800 | 4.63383300  | -0.70590100 | H                  | 1.57551700  | -4.54993000 | 0.73041800  |
| C                  | 4.39750400  | -0.13346800 | 2.61371100  | C                  | -3.14773900 | 0.30451500  | 4.49883900  |
| C                  | 3.21242300  | 0.56943400  | 3.29712600  | C                  | -3.41553800 | 0.43029500  | 2.98853400  |
| C                  | 1.95967300  | 0.42944200  | 2.43203900  | C                  | -2.09131200 | 0.34306900  | 2.23081900  |
| O                  | 1.39777600  | -0.71113300 | 2.28914400  | O                  | -1.48111200 | -0.77629500 | 2.12357600  |
| O                  | 1.44136200  | 1.43740800  | 1.84153600  | O                  | -1.55300400 | 1.37732500  | 1.71063000  |
| N                  | 3.56578400  | 1.94743300  | 3.63680500  | N                  | -4.19542500 | 1.63686600  | 2.71257400  |
| H                  | 5.26503900  | -0.11110800 | 3.28037500  | H                  | -4.10155700 | 0.28117300  | 5.03482900  |
| H                  | 4.15610300  | -1.17462300 | 2.38121100  | H                  | -2.59247500 | -0.61049400 | 4.72546900  |
| H                  | 4.66603100  | 0.37654800  | 1.68071000  | H                  | -2.56773800 | 1.16156400  | 4.86277700  |
| H                  | 2.99212300  | 0.03868900  | 4.23169500  | H                  | -4.00781900 | -0.43570400 | 2.66965400  |
| H                  | 2.78919600  | 2.40262000  | 4.11459900  | H                  | -4.39371300 | 1.70852600  | 1.71545900  |
| H                  | 3.72180000  | 2.48486600  | 2.78415700  | H                  | -3.64686100 | 2.46385800  | 2.94806800  |
| <b>Ala-chel-1b</b> |             |             |             | <b>Ala-chel-1c</b> |             |             |             |
| O                  | -1.41692800 | -1.60157700 | -1.10279200 | Mo                 | -0.20994300 | 0.09490400  | -0.66463700 |
| O                  | -1.77240400 | -1.40484600 | 1.07544300  | O                  | 1.03119500  | 1.80522000  | -0.79653300 |
| O                  | -1.33939200 | 1.33654000  | -1.34383000 | O                  | -1.94517500 | 1.31327600  | -0.81127500 |
| O                  | -1.69667600 | 1.57727700  | 0.83503000  | C                  | -2.72073300 | 1.42218500  | 0.19952600  |
| O                  | 1.13430300  | 1.49817700  | 1.99992300  | C                  | -4.00529000 | 2.24556600  | 0.08307400  |
| O                  | 2.71649400  | 1.85830400  | 3.54744300  | Mo                 | -0.71520800 | -0.40251600 | 1.36447400  |
| N                  | 1.24779100  | -1.13372400 | 2.08673200  | O                  | -2.43130300 | 0.81969700  | 1.29087800  |
| C                  | -2.07454600 | -1.92351500 | -0.05682600 | O                  | 0.31375900  | 3.40941600  | 0.61510300  |
| C                  | -3.19521400 | -2.96191000 | -0.16844200 | C                  | 1.00673200  | 3.02266100  | -0.33878300 |
| C                  | -1.93331100 | 1.92162600  | -0.37462600 | C                  | 1.94430900  | 4.00120300  | -1.09718900 |
| C                  | -2.91524500 | 3.06728500  | -0.64553100 | O                  | -1.38231600 | -1.53653200 | -1.36513200 |
| C                  | 2.67466100  | -0.18678100 | -1.54857700 | O                  | -1.89443600 | -2.02124700 | 0.73258400  |
| C                  | 4.13206400  | -0.19992800 | -2.01521500 | C                  | -1.98299600 | -2.28173300 | -0.51801800 |
| C                  | 1.99804600  | 1.09110600  | 2.88452300  | C                  | -2.77714200 | -3.49367200 | -1.00850700 |
| C                  | 2.03320900  | -0.44375300 | 3.11029400  | O                  | 1.49256900  | -1.02300400 | -1.28118600 |
| H                  | 1.55513100  | -0.57683300 | 4.09800800  | O                  | 3.25416700  | -0.67887700 | 0.08229100  |
| C                  | 3.46893100  | -0.97092300 | 3.22529300  | C                  | 2.74341100  | -1.13135300 | -0.95676600 |
| H                  | 4.01036500  | -0.83297700 | 2.28030400  | C                  | 3.60013700  | -1.91198700 | -1.99125000 |
| H                  | 4.01769600  | -0.44737700 | 4.01437300  | C                  | -4.66430800 | 2.42968400  | 1.46136600  |
| H                  | 3.45848500  | -2.04202500 | 3.46020400  | H                  | -3.99974900 | 2.95531400  | 2.15595400  |
| C                  | -4.16588500 | -2.53765600 | -1.29349400 | H                  | -5.57961000 | 3.02334500  | 1.35111600  |
| H                  | -4.96072900 | -3.28616700 | -1.39824400 | H                  | -4.93288300 | 1.46855100  | 1.91127000  |
| H                  | -4.63689600 | -1.57321500 | -1.06775200 | C                  | -3.67466600 | 3.62437300  | -0.52922100 |
| H                  | -3.64685600 | -2.44953300 | -2.25284200 | H                  | -3.21224000 | 3.52029800  | -1.51529800 |
| C                  | -3.96126800 | -3.08874800 | 1.15944000  | H                  | -4.59690700 | 4.20736200  | -0.63957800 |
| H                  | -4.75773100 | -3.83502100 | 1.05212800  | H                  | -2.99027600 | 4.19039700  | 0.11331300  |
| H                  | -3.30320700 | -3.40598400 | 1.97475900  | C                  | -4.97002300 | 1.48146600  | -0.85756700 |
| H                  | -4.42268900 | -2.13777300 | 1.44774000  | H                  | -5.22108400 | 0.49394700  | -0.45229800 |
| C                  | -2.54988400 | -4.32193700 | -0.53046800 | H                  | -5.90179000 | 2.04918200  | -0.96873100 |
| H                  | -3.32955900 | -5.08752100 | -0.62594200 | H                  | -4.52993500 | 1.34530700  | -1.85092500 |
| H                  | -2.00853100 | -4.26261900 | -1.48039600 | C                  | -3.83865700 | -3.01214500 | -2.02410100 |
| H                  | -1.84828200 | -4.64804800 | 0.24683500  | H                  | -3.37250000 | -2.50502100 | -2.87464300 |
| C                  | -3.07002000 | 3.31982700  | -2.15480200 | H                  | -4.40254200 | -3.87331600 | -2.40211300 |
| H                  | -3.45410400 | 2.43433800  | -2.67262200 | H                  | -4.54956000 | -2.32007400 | -1.55701600 |
| H                  | -3.77630200 | 4.14301600  | -2.31778400 | C                  | -1.79337400 | -4.46108900 | -1.70984100 |
| H                  | -2.11519700 | 3.59346100  | -2.61618700 | H                  | -1.30141100 | -3.97757500 | -2.55966300 |
| C                  | -2.37365500 | 4.34218900  | 0.04370900  | H                  | -1.01943700 | -4.81206300 | -1.01678700 |
| H                  | -3.06533900 | 5.17653700  | -0.12534000 | H                  | -2.34000700 | -5.33694100 | -2.07958900 |





|   |             |             |             |   |             |             |             |
|---|-------------|-------------|-------------|---|-------------|-------------|-------------|
| C | -3.92869500 | -0.44168700 | -2.66469000 | H | 4.66073800  | -1.57792800 | 0.60523600  |
| C | 5.32811600  | 0.63633500  | 0.84584900  | C | 2.39968000  | -4.21867600 | 0.95991000  |
| H | 5.17491900  | -0.25191300 | 1.46769900  | H | 2.18428600  | -4.34626900 | -0.10535100 |
| H | 6.40569300  | 0.75735900  | 0.68282600  | H | 3.13906400  | -4.97215100 | 1.25521600  |
| H | 4.96791300  | 1.50676000  | 1.40446700  | H | 1.47857600  | -4.40805700 | 1.52385900  |
| C | 5.15511400  | -0.73403300 | -1.26740200 | C | 4.24163800  | 2.57492900  | -0.42179600 |
| H | 4.67237100  | -0.84309900 | -2.24375700 | H | 4.99736300  | 3.31787600  | -0.70255800 |
| H | 6.23492300  | -0.62750200 | -1.42645000 | H | 4.04275400  | 2.67433100  | 0.65006100  |
| H | 4.98613200  | -1.65350700 | -0.69416900 | H | 4.66046900  | 1.57853500  | -0.60586300 |
| C | 4.86519000  | 1.77355900  | -1.35990600 | C | 2.39888400  | 4.21893300  | -0.95978800 |
| H | 4.48675300  | 2.66958700  | -0.85339500 | H | 3.13808500  | 4.97256900  | -1.25514100 |
| H | 5.94210100  | 1.90430000  | -1.52016800 | H | 1.47764100  | 4.40822800  | -1.52353700 |
| H | 4.37782600  | 1.69874500  | -2.33702500 | H | 2.18367100  | 4.34635600  | 0.10552900  |
| C | 1.28689500  | 4.87376100  | 0.56190200  | C | 3.27185800  | 2.66700400  | -2.75316400 |
| H | 2.17116800  | 4.60340300  | -0.02811900 | H | 2.37943000  | 2.82828500  | -3.36733300 |
| H | 1.21893000  | 5.96811500  | 0.58725200  | H | 4.02079800  | 3.41533600  | -3.03718900 |
| H | 1.43247300  | 4.51349700  | 1.58511000  | H | 3.67280300  | 1.67594400  | -2.98934100 |
| C | -0.18118600 | 4.82437500  | -1.48958200 | C | -3.64201200 | 1.24285600  | 4.06003800  |
| H | 0.66711000  | 4.55640900  | -2.12838200 | C | -3.77004300 | 1.17565900  | 2.52844700  |
| H | -1.09201800 | 4.43269500  | -1.95447500 | C | -2.40051900 | 0.90113800  | 1.90636000  |
| H | -0.25532400 | 5.91820100  | -1.46164500 | O | -1.80153900 | -0.20523800 | 2.13965300  |
| C | -1.21986100 | 4.68644100  | 0.80586000  | O | -1.82338100 | 1.75598900  | 1.15366700  |
| H | -1.31714800 | 5.77873000  | 0.82291900  | N | -4.44262300 | 2.36995900  | 2.01905600  |
| H | -2.14856800 | 4.26860500  | 0.39960700  | H | -4.63702700 | 1.34628000  | 4.50366900  |
| H | -1.10601000 | 4.33422400  | 1.83578600  | H | -3.17166500 | 0.33736100  | 4.45372800  |
| C | 2.06996000  | -4.62406900 | -1.01997900 | H | -3.03732500 | 2.10680600  | 4.36242600  |
| H | 1.79988700  | -4.28495500 | -2.02467700 | H | -4.39147000 | 0.30702400  | 2.27549600  |
| H | 3.02920400  | -4.16666800 | -0.74861900 | H | -4.53892200 | 2.31438700  | 1.00606300  |
| H | 2.20959400  | -5.71144900 | -1.04779800 | H | -3.86833700 | 3.19343100  | 2.19890800  |
| C | -0.36558800 | -4.92179200 | -0.42312100 | C | -3.64308900 | -1.24226500 | -4.05947400 |
| H | -0.25119400 | -6.01236300 | -0.44605800 | C | -3.77034100 | -1.17570200 | -2.52779800 |
| H | -1.17026000 | -4.68044100 | 0.28176200  | C | -2.40050700 | -0.90159600 | -1.90621000 |
| H | -0.66844500 | -4.58648900 | -1.42028000 | O | -1.80143400 | 0.20471800  | -2.13969600 |
| C | 1.37260000  | -4.77734100 | 1.40010700  | O | -1.82327800 | -1.75647900 | -1.15365800 |
| H | 0.60552000  | -4.55128600 | 2.14769500  | N | -4.44283400 | -2.37013100 | -2.01858700 |
| H | 1.50776500  | -5.86511100 | 1.36629600  | H | -4.63834100 | -1.34536800 | -4.50264800 |
| H | 2.31383200  | -4.32776500 | 1.73510500  | H | -3.17281800 | -0.33666900 | -4.45301800 |
| C | -3.48905000 | 0.89514600  | 4.22126400  | H | -3.03867100 | -2.10617000 | -4.36253000 |
| C | -2.96575800 | -0.49258900 | 3.81539900  | H | -4.39152000 | -0.30708800 | -2.27416000 |
| C | -1.53030300 | -0.34876300 | 3.26003400  | H | -4.53837200 | -2.31512000 | -1.00549200 |
| O | -1.43552400 | -0.24925000 | 1.97523400  | H | -3.86889100 | -3.19364500 | -2.19934300 |
| O | -0.56865600 | -0.30561300 | 4.05510700  |   |             |             |             |
| N | -3.92607400 | -1.13669900 | 2.90855300  |   |             |             |             |
| H | -4.46810100 | 0.79890700  | 4.70316000  |   |             |             |             |
| H | -2.80166600 | 1.38607400  | 4.91825500  |   |             |             |             |
| H | -3.60203300 | 1.53874200  | 3.33972200  |   |             |             |             |
| H | -2.89208500 | -1.11327700 | 4.71566100  |   |             |             |             |
| H | -3.61129200 | -2.08383100 | 2.69842000  |   |             |             |             |
| H | -3.90580400 | -0.64522900 | 2.01428500  |   |             |             |             |
| C | -5.26077300 | 0.32439900  | -2.61549700 |   |             |             |             |
| H | -5.13629800 | 1.36463200  | -2.93586800 |   |             |             |             |
| H | -5.98995100 | -0.15352100 | -3.28240500 |   |             |             |             |
| H | -5.67941000 | 0.33475000  | -1.60337800 |   |             |             |             |
| C | -3.38231100 | -0.43090200 | -4.10977600 |   |             |             |             |
| H | -2.44669800 | -0.99355900 | -4.18419600 |   |             |             |             |
| H | -4.11337100 | -0.88550600 | -4.79092100 |   |             |             |             |
| H | -3.19462900 | 0.59380500  | -4.45568300 |   |             |             |             |
| C | -4.15710400 | -1.90151000 | -2.21257500 |   |             |             |             |

|                    |             |             |             |
|--------------------|-------------|-------------|-------------|
| H                  | -4.54056200 | -1.94333600 | -1.18504900 |
| H                  | -4.89466000 | -2.38586300 | -2.86569000 |
| H                  | -3.22802000 | -2.47829800 | -2.25428900 |
| <b>Ala-chel-2b</b> |             |             |             |
| O                  | -0.77327600 | 1.88129700  | 1.07941500  |
| O                  | -1.61388000 | 1.24071900  | -0.88726500 |
| O                  | -1.61331900 | -1.24061000 | 0.88757600  |
| O                  | -0.77414800 | -1.88168400 | -1.07955300 |
| O                  | 1.80103200  | 0.82692300  | 2.14100900  |
| O                  | 3.80607100  | 0.40372300  | 3.09283700  |
| O                  | 1.80030000  | -0.82729300 | -2.14181600 |
| O                  | 3.80623500  | -0.40418000 | -3.09176500 |
| N                  | 1.23801100  | -1.45899900 | 1.58423500  |
| N                  | 1.23711500  | 1.45859200  | -1.58490700 |
| C                  | -1.63889000 | 1.99679900  | 0.14526100  |
| C                  | -2.71344600 | 3.07655800  | 0.27032800  |
| C                  | -1.63916800 | -1.99686200 | -0.14483300 |
| C                  | -2.71436900 | -3.07606000 | -0.26921400 |
| C                  | 2.79650100  | 0.04211500  | 2.51049300  |
| C                  | 2.55734600  | -1.47505100 | 2.13156200  |
| H                  | 2.56806800  | -2.05297300 | 3.06663000  |
| C                  | 3.63691400  | -2.02429300 | 1.18699000  |
| H                  | 3.63606200  | -1.48743300 | 0.23455400  |
| H                  | 4.61841600  | -1.91733900 | 1.65839500  |
| C                  | 2.79605800  | -0.04259500 | -2.51038000 |
| C                  | 2.55659300  | 1.47467700  | -2.13195200 |
| H                  | 2.56730900  | 2.05229700  | -3.06721500 |
| C                  | 3.63581700  | 2.02448200  | -1.18736800 |
| H                  | 3.63482500  | 1.48800200  | -0.23471900 |
| H                  | 4.61744700  | 1.91749100  | -1.65849100 |
| H                  | 3.45464300  | 3.08585600  | -0.99329600 |
| H                  | 3.45595900  | -3.08562000 | 0.99245600  |
| C                  | -3.47353500 | 2.85402900  | 1.59928200  |
| H                  | -4.23731500 | 3.63163100  | 1.71323000  |
| H                  | -3.97766500 | 1.88045600  | 1.61173500  |
| H                  | -2.79727700 | 2.90564400  | 2.45771100  |
| C                  | -3.69306400 | 3.02453700  | -0.91374300 |
| H                  | -4.44797900 | 3.80982500  | -0.79231100 |
| H                  | -3.18110200 | 3.18814900  | -1.86744800 |
| H                  | -4.21013800 | 2.06057600  | -0.96559700 |
| C                  | -1.99701800 | 4.44915000  | 0.30603600  |
| H                  | -2.74548200 | 5.24266600  | 0.41225300  |
| H                  | -1.30314800 | 4.51293500  | 1.14970000  |
| H                  | -1.43810500 | 4.63205300  | -0.61922600 |
| C                  | -3.68965900 | -3.02743700 | 0.91855100  |
| H                  | -4.20625700 | -2.06350700 | 0.97528800  |
| H                  | -4.44521300 | -3.81215900 | 0.79744700  |
| H                  | -3.17425900 | -3.19415400 | 1.86988200  |
| C                  | -1.99880900 | -4.44883400 | -0.31220100 |
| H                  | -2.74805400 | -5.24167100 | -0.41798400 |
| H                  | -1.30832800 | -4.51021800 | -1.15880300 |
| H                  | -1.43628200 | -4.63500500 | 0.61022300  |
| C                  | -3.47925500 | -2.84867200 | -1.59465600 |
| H                  | -2.80609800 | -2.89736600 | -2.45570100 |
| H                  | -4.24353200 | -3.62579000 | -1.70857700 |
| H                  | -3.98329700 | -1.87500600 | -1.60180700 |
| Mo                 | 0.16198300  | 0.10048600  | -1.28727200 |
| Mo                 | 0.16293900  | -0.10079300 | 1.28650800  |

**Table 2SI.** The Cartesian Coordinates of Mandelic acid (MA) substituted dimolybdenum *tetrakis*( $\mu$ -pivalate) **Mo<sub>2</sub>** complexes.

| MA-bridge-1 |             |             |             | MA-bridge-2 <i>cis</i> |             |             |             |
|-------------|-------------|-------------|-------------|------------------------|-------------|-------------|-------------|
| Mo          | -0.60881600 | -0.02677100 | -.09572100  | Mo                     | -0.26237600 | -0.81713900 | -1.15894800 |
| O           | -1.70724000 | -1.85179400 | -1.06367500 | O                      | -0.45164000 | -2.91621900 | -0.93955700 |
| O           | 0.48755200  | 1.79531600  | -1.22452900 | O                      | -2.37261700 | -0.60550000 | -1.09141100 |
| O           | -2.42809700 | 1.06693600  | -1.00886700 | C                      | -2.93565200 | -0.41579800 | 0.04384300  |
| C           | -1.94305700 | -2.39954600 | 0.07046200  | C                      | -4.45939800 | -0.30408800 | 0.10407900  |
| C           | -2.73329800 | -3.70942400 | 0.10802000  | Mo                     | -0.12638600 | -0.55755200 | 0.95110200  |
| Mo          | -0.44281100 | -0.03013400 | 0.02336100  | O                      | -2.23199100 | -0.33730900 | 1.10913700  |
| C           | 0.90119000  | 2.33656200  | -0.14141700 | O                      | -0.31538100 | -2.65191600 | 1.26229900  |
| C           | -2.88511500 | 1.39281000  | 0.14351000  | C                      | -0.43263300 | -3.41345100 | 0.24199700  |
| O           | -1.52739900 | -1.85906400 | 1.15292600  | C                      | -0.53103000 | -4.93034300 | 0.40792000  |
| O           | 0.66141800  | 1.79034300  | 0.99257300  | C                      | -4.91395500 | 0.80494000  | -0.87252500 |
| O           | -2.25833000 | 1.06073700  | 1.20768000  | H                      | -4.60390200 | 0.58181100  | -1.89794600 |
| C           | 1.68530000  | 3.65019800  | -0.17657600 | H                      | -6.00714200 | 0.88464200  | -0.85157900 |
| C           | -4.18717700 | 2.19199800  | 0.22604400  | H                      | -4.49737300 | 1.77896000  | -0.58986800 |
| C           | 0.88213300  | 4.71238500  | 0.61157400  | C                      | -5.05373900 | -1.66217400 | -0.34356300 |
| H           | 0.72975600  | 4.40357900  | 1.65050000  | H                      | -4.73832800 | -2.47361300 | 0.32307400  |
| H           | 1.43115200  | 5.66147600  | 0.61056400  | H                      | -6.14839400 | -1.60761700 | -0.31713100 |
| H           | -0.09944000 | 4.88828200  | 0.15533200  | H                      | -4.74564500 | -1.91284700 | -1.36349600 |
| C           | 1.89897900  | 4.12516600  | -1.62363200 | C                      | -1.79082800 | -5.43044900 | -0.33591100 |
| H           | 2.45972500  | 5.06727400  | -1.61793800 | H                      | -2.70208400 | -4.99035400 | 0.08650100  |
| H           | 2.46846500  | 3.39359400  | -2.20661500 | H                      | -1.74881500 | -5.18092900 | -1.40040100 |
| H           | 0.94618800  | 4.29856600  | -2.13468500 | H                      | -1.86429600 | -6.51990900 | -0.23860000 |
| C           | 3.05226600  | 3.42284000  | 0.51005300  | C                      | 0.73138600  | -5.56041800 | -0.22973500 |
| H           | 3.64125900  | 2.66334500  | -0.01746800 | H                      | 1.64394900  | -5.21567100 | 0.27099200  |
| H           | 3.62393500  | 4.35845600  | 0.50631200  | H                      | 0.68371800  | -6.65142700 | -0.13315200 |
| H           | 2.92563000  | 3.10051100  | 1.54817600  | H                      | 0.80483100  | -5.31131600 | -1.29307900 |
| C           | -3.97184900 | 3.54040300  | -0.50196300 | C                      | -0.61217800 | -5.31544700 | 1.89480700  |
| H           | -4.89627800 | 4.12866600  | -0.46367700 | H                      | -0.68016700 | -6.40589500 | 1.98433500  |
| H           | -3.17733400 | 4.12684700  | -0.02516000 | H                      | 0.27316500  | -4.98211500 | 2.44587600  |
| H           | -3.70467400 | 3.38603800  | -1.55205400 | H                      | -1.49471000 | -4.87875200 | 2.37468000  |
| C           | -5.30138800 | 1.39119100  | -0.48738300 | C                      | -4.92963000 | 0.02631400  | 1.53059000  |
| H           | -5.46885100 | 0.42309100  | -0.00029400 | H                      | -4.52131800 | 0.98195000  | 1.87652900  |
| H           | -6.24006400 | 1.95641500  | -0.44888000 | H                      | -6.02342700 | 0.09788100  | 1.54475800  |
| H           | -5.05077000 | 1.21035100  | -1.53720100 | H                      | -4.62896600 | -0.74892800 | 2.24284500  |
| C           | -4.58236200 | 2.44733100  | 1.69047300  | C                      | 5.34968200  | 0.30704300  | 1.36828000  |
| H           | -3.81413700 | 3.02029200  | 2.22014000  | C                      | 5.94738200  | 1.50023500  | 1.78876900  |
| H           | -5.51661100 | 3.02025700  | 1.72013900  | C                      | 5.95770000  | 2.61379400  | 0.94272700  |
| H           | -4.74036700 | 1.50941500  | 2.23343000  | C                      | 5.36991200  | 2.52747600  | -0.32514900 |
| C           | -4.12823900 | -3.44991200 | -0.50916500 | C                      | 4.77083800  | 1.33564300  | -0.74204200 |
| H           | -4.68427100 | -2.70019800 | 0.06648100  | C                      | 4.75361800  | 0.21782300  | 0.10402100  |
| H           | -4.04560400 | -3.09991900 | -1.54286600 | C                      | 4.08088500  | -1.07890500 | -0.33523300 |
| H           | -4.70949200 | -4.37957600 | -0.50485200 | C                      | 2.55686100  | -0.95377000 | -0.23935600 |
| C           | -2.88742100 | -4.21798100 | 1.55125800  | O                      | 1.88173300  | -1.03506500 | -1.32066300 |
| H           | -3.45581300 | -5.15551600 | 1.54780200  | O                      | 2.01641800  | -0.77159600 | 0.89410600  |
| H           | -1.91433800 | -4.41122000 | 2.01512000  | O                      | 4.46041500  | -1.45552100 | -1.65274700 |
| H           | -3.42383100 | -3.49655100 | 2.17646000  | H                      | 5.34997900  | -0.55923700 | 2.02607000  |
| C           | -1.97945400 | -4.75897400 | -0.74198300 | H                      | 6.40937500  | 1.55615100  | 2.77102900  |
| H           | -0.98086400 | -4.95739700 | -0.33445700 | H                      | 6.42394700  | 3.54087100  | 1.26598700  |
| H           | -2.53897400 | -5.70186400 | -0.74086000 | H                      | 5.37876000  | 3.38757300  | -0.98978000 |
| H           | -1.86896200 | -4.42478900 | -1.77819600 | H                      | 4.32366500  | 1.27213200  | -1.73072700 |
| C           | 4.92298700  | -1.70221100 | 1.30688800  | H                      | 4.37742000  | -1.87610700 | 0.35821600  |
| C           | 6.04898600  | -0.95723700 | 1.67504400  | H                      | 3.65139600  | -1.44778400 | -2.19825500 |
| C           | 6.59038500  | -0.02208100 | 0.78755900  | C                      | -0.82653600 | 4.93264400  | 1.14638400  |
| C           | 6.00047000  | 0.16480200  | -0.46861100 | C                      | -1.92390500 | 5.62863800  | 1.66490500  |
| C           | 4.87423400  | -0.57742900 | -0.83303900 | C                      | -3.10811900 | 5.71961100  | 0.92639400  |

|                         |             |             |             |                    |             |             |             |
|-------------------------|-------------|-------------|-------------|--------------------|-------------|-------------|-------------|
| C                       | 4.32650600  | -1.51567800 | 0.05375900  | C                  | -3.18884300 | 5.11195900  | -0.33230300 |
| C                       | 3.09537700  | -2.32752700 | -0.33840900 | C                  | -2.09288000 | 4.41421300  | -0.84735700 |
| C                       | 1.82062500  | -1.48751600 | -0.21148200 | C                  | -0.90458700 | 4.31786400  | -0.10966000 |
| O                       | 1.22036000  | -1.15702900 | -1.28920300 | C                  | 0.29033300  | 3.54442200  | -0.66006000 |
| O                       | 1.40022500  | -1.15434800 | 0.93963000  | C                  | 0.10775600  | 2.03889200  | -0.44743400 |
| O                       | 3.20315200  | -2.85239200 | -1.65721000 | O                  | -0.03190300 | 1.30366100  | -1.48304400 |
| H                       | 4.51107700  | -2.43615000 | 1.99591700  | O                  | 0.10326400  | 1.56857800  | 0.73174700  |
| H                       | 6.50595100  | -1.11514500 | 2.64851000  | O                  | 0.51271100  | 3.82016000  | -2.03779900 |
| H                       | 7.46839700  | 0.55347400  | 1.06891100  | H                  | 0.09534600  | 4.87176900  | 1.72030000  |
| H                       | 6.41874500  | 0.88704000  | -1.16505200 | H                  | -1.84960300 | 6.10519100  | 2.63895400  |
| H                       | 4.42672000  | -0.43540100 | -1.81322300 | H                  | -3.95998100 | 6.26439400  | 1.32498600  |
| H                       | 2.99485500  | -3.16653900 | 0.36022000  | H                  | -4.10436700 | 5.18292600  | -0.91404700 |
| H                       | 2.53357700  | -2.39736100 | -2.20193300 | H                  | -2.15657800 | 3.95294300  | -1.82910900 |
|                         |             |             |             | H                  | 1.18459600  | 3.83724000  | -0.09595300 |
|                         |             |             |             | H                  | 0.36025700  | 2.98887900  | -2.52535400 |
| <b>MA-bridge-2trans</b> |             |             |             | <b>MA-bridge-3</b> |             |             |             |
| Mo                      | -0.00374100 | 0.01725800  | -1.30896000 | Mo                 | 0.09792700  | -0.65187000 | -1.32319800 |
| O                       | 1.06508100  | 1.85545000  | -1.33906100 | O                  | -0.87541700 | -2.52861400 | -1.21659700 |
| O                       | -1.07482200 | -1.81928200 | -1.37231500 | Mo                 | 0.03534300  | -0.43993400 | .79675600   |
| C                       | 1.38521900  | 2.39428800  | -0.22135900 | C                  | -1.20140500 | -2.98480000 | -0.06573200 |
| C                       | 2.12365000  | 3.73388100  | -0.22816500 | O                  | -0.94633500 | -2.30929100 | 0.99255100  |
| Mo                      | 0.00233500  | -0.00720800 | 0.82035300  | C                  | -1.88709900 | -4.34420000 | 0.07037900  |
| C                       | -1.38512100 | -2.38504300 | -0.26731800 | C                  | -3.20768300 | -4.15266900 | 0.85180100  |
| O                       | 1.07301300  | 1.82954000  | 0.88339400  | H                  | -3.89274700 | -3.48413500 | 0.31723600  |
| O                       | -1.06505200 | -1.84599100 | 0.85011700  | H                  | -3.70460400 | -5.12248800 | 0.97150300  |
| C                       | -2.11740300 | -3.72798500 | -0.26058300 | H                  | -3.02371000 | -3.73420700 | 1.84598500  |
| C                       | -5.18548400 | 1.74754000  | 1.76117800  | C                  | -2.17795400 | -4.95317800 | -1.31162900 |
| C                       | -6.21640600 | 1.03305100  | 2.38149600  | H                  | -1.25820300 | -5.10671400 | -1.88547100 |
| C                       | -6.88215900 | 0.01908700  | 1.68589400  | H                  | -2.66722000 | -5.92576100 | -1.18382600 |
| C                       | -6.51239900 | -0.27638500 | 0.36797500  | H                  | -2.84288600 | -4.31238900 | -1.90062900 |
| C                       | -5.47994400 | 0.43529800  | -0.24853400 | C                  | -0.94399900 | -5.27650600 | 0.86901900  |
| C                       | -4.80746400 | 1.45104600  | 0.44591100  | H                  | -0.73208700 | -4.86941100 | 1.86270800  |
| C                       | -3.67090600 | 2.22217400  | -0.21628800 | H                  | -1.41898300 | -6.25685400 | 0.99206700  |
| C                       | -2.37229900 | 1.40996100  | -0.21337400 | H                  | 0.00743700  | -5.42428400 | 0.34441300  |
| O                       | -1.85376500 | 1.10633300  | -1.34052300 | C                  | 1.36448900  | 5.01319100  | 1.07926100  |
| O                       | -1.84274900 | 1.07910400  | 0.89258200  | C                  | 0.52439800  | 6.05397700  | 1.49137800  |
| O                       | -4.00376400 | 2.60974100  | -1.54379800 | C                  | -0.52592600 | 6.47284700  | 0.66912500  |
| H                       | -4.67627100 | 2.54156500  | 2.30272400  | C                  | -0.73218700 | 5.84728900  | -0.56689000 |
| H                       | -6.50286900 | 1.27521000  | 3.40164200  | C                  | 0.10590400  | 4.80690900  | -0.97542000 |
| H                       | -7.68678200 | -0.53368100 | 2.16377600  | C                  | 1.15917700  | 4.38108100  | -0.15286600 |
| H                       | -7.02916000 | -1.06016200 | -0.17998400 | C                  | 2.07031200  | 3.23891900  | -0.59082900 |
| H                       | -5.20286300 | 0.20959400  | -1.27481200 | C                  | 1.35472800  | 1.89218400  | -0.45958200 |
| H                       | -3.47270000 | 3.12440800  | 0.37758000  | O                  | 1.10849000  | 1.24063200  | -1.52996600 |
| H                       | -3.33049000 | 2.22308600  | -2.13457800 | O                  | 1.03025900  | 1.46468100  | 0.69177200  |
| C                       | 5.20137300  | -1.85157200 | 1.70315000  | O                  | 2.53904300  | 3.41790400  | -1.92266900 |
| C                       | 6.22744000  | -1.16665300 | 2.36395400  | H                  | 2.18530600  | 4.69514900  | 1.71811800  |
| C                       | 6.86783900  | -0.09272300 | 1.73834200  | H                  | 0.69669600  | 6.53990800  | 2.44819800  |
| C                       | 6.47801500  | 0.29261800  | 0.44957500  | H                  | -1.17684400 | 7.28386100  | 0.98508300  |
| C                       | 5.45079400  | -0.38984100 | -0.20696200 | H                  | -1.54434000 | 6.17103800  | -1.21278000 |
| C                       | 4.80350800  | -1.46588300 | 0.41741000  | H                  | -0.05268900 | 4.33172300  | -1.94010200 |
| C                       | 3.67344400  | -2.20529400 | -0.28894400 | H                  | 2.93534000  | 3.20500700  | 0.08307900  |
| C                       | 2.37303600  | -1.39660700 | -0.25908500 | H                  | 2.18294700  | 2.68238600  | -2.45557200 |
| O                       | 1.84551400  | -1.06953800 | -1.37558700 | C                  | -5.16284200 | 1.53280000  | 1.43777300  |
| O                       | 1.84983700  | -1.09306700 | 0.85753600  | C                  | -6.19252300 | 0.96369100  | 2.19560600  |
| O                       | 4.01997100  | -2.52837500 | -1.63059200 | C                  | -6.84761300 | -0.18293800 | 1.73630800  |
| H                       | 4.71128500  | -2.69173600 | 2.19000600  | C                  | -6.46877200 | -0.75742900 | 0.51655800  |
| H                       | 6.52943500  | -1.47783300 | 3.36061900  | C                  | -5.43780100 | -0.19030200 | -0.23669700 |
| H                       | 7.66835300  | 0.43760200  | 2.24750700  | C                  | -4.77595200 | 0.95796400  | 0.22135400  |
| H                       | 6.97492000  | 1.12384200  | -0.04411500 | C                  | -3.64541400 | 1.57400300  | -0.59116600 |

|                    |             |             |             |                   |             |             |             |
|--------------------|-------------|-------------|-------------|-------------------|-------------|-------------|-------------|
| H                  | 5.15742300  | -0.09309800 | -1.21047000 | C                 | -2.34502700 | 0.77567500  | -0.45614500 |
| H                  | 3.47130100  | -3.13463700 | 0.26069500  | O                 | -1.78339500 | 0.36099300  | -1.52607600 |
| H                  | 3.33231600  | -2.14412900 | -2.20627200 | O                 | -1.84512600 | 0.58065100  | 0.69532300  |
| C                  | -3.33609200 | -3.63190800 | 0.68429100  | O                 | -4.00795000 | 1.69594000  | -1.96134100 |
| H                  | -4.04655900 | -2.87064600 | 0.34099300  | H                 | -4.66115800 | 2.42962900  | 1.79416700  |
| H                  | -3.85734200 | -4.59612200 | 0.70764100  | H                 | -6.48600800 | 1.42099800  | 3.13692500  |
| H                  | -3.02939300 | -3.38080200 | 1.70404900  | H                 | -7.65109500 | -0.62379600 | 2.32058500  |
| C                  | -2.57919200 | -4.10767300 | -1.67789000 | H                 | -6.97724200 | -1.64631300 | 0.15200800  |
| H                  | -1.73282300 | -4.19773800 | -2.36618800 | H                 | -5.15241200 | -0.63285700 | -1.18730700 |
| H                  | -3.09771300 | -5.07300900 | -1.64468100 | H                 | -3.42955400 | 2.57177200  | -0.18271700 |
| H                  | -3.27165000 | -3.36363300 | -2.08670200 | H                 | -3.27667300 | 1.32321600  | -2.48843700 |
| C                  | -1.13169600 | -4.79691600 | 0.27313100  | C                 | 5.35571100  | -1.57611500 | 1.87031300  |
| H                  | -0.79526500 | -4.55544000 | 1.28662200  | C                 | 6.31544800  | -0.67351300 | 2.34191400  |
| H                  | -1.63049500 | -5.77295700 | 0.29917800  | C                 | 6.86289600  | 0.28068500  | 1.47872500  |
| H                  | -0.25057600 | -4.88399300 | -0.37368100 | C                 | 6.44725300  | 0.32745400  | 0.14232200  |
| C                  | 3.36336000  | 3.61704100  | -1.14346900 | C                 | 5.48671400  | -0.57268600 | -0.32624500 |
| H                  | 3.07840200  | 3.35330900  | -2.16645500 | C                 | 4.93265500  | -1.52942600 | 0.53635600  |
| H                  | 3.89129700  | 4.57756800  | -1.16850500 | C                 | 3.86997700  | -2.50317900 | 0.03475900  |
| H                  | 4.06071500  | 2.85661300  | -0.77233400 | C                 | 2.50841200  | -1.81082700 | -0.05793200 |
| C                  | 2.55581400  | 4.12898500  | 1.19420800  | O                 | 1.99852400  | -1.64502300 | -1.21723500 |
| H                  | 3.07983100  | 5.09134300  | 1.16047400  | O                 | 1.93148700  | -1.41945300 | 1.00397300  |
| H                  | 1.69458500  | 4.23212200  | 1.86205000  | O                 | 4.21844300  | -3.07255800 | -1.22112600 |
| H                  | 3.23472900  | 3.38679000  | 1.62794900  | H                 | 4.93783400  | -2.32157200 | 2.54315900  |
| C                  | 1.15819600  | 4.80209400  | -0.79833400 | H                 | 6.63891600  | -0.72238600 | 3.37840900  |
| H                  | 1.66420800  | 5.77439100  | -0.82524000 | H                 | 7.61168500  | 0.97981800  | 1.84176600  |
| H                  | 0.84331800  | 4.54979700  | -1.81602400 | H                 | 6.87193700  | 1.06384700  | -0.53511900 |
| H                  | 0.26301700  | 4.90345000  | -0.17324800 | H                 | 5.17422800  | -0.53797300 | -1.36659200 |
|                    |             |             |             | H                 | 3.76554100  | -3.31262300 | 0.76760500  |
|                    |             |             |             | H                 | 3.56381600  | -2.76109200 | -1.87367500 |
| <b>MA-bridge-4</b> |             |             |             | <b>MA-chel-1a</b> |             |             |             |
| Mo                 | 0.08628200  | -0.03724800 | -1.45619500 | Mo                | 1.43022000  | -0.05135100 | 0.92936600  |
| Mo                 | -0.0217220  | -0.05694600 | 0.6740490   | O                 | 2.15612700  | -1.98365000 | 0.46044000  |
| C                  | -3.56247400 | 4.17085000  | 1.48699900  | O                 | 3.16561800  | 0.82150800  | 0.15494400  |
| C                  | -4.80731400 | 4.08534900  | 2.12083500  | C                 | 3.19884500  | 1.17433500  | -1.07719000 |
| C                  | -5.88155200 | 3.46818800  | 1.47283900  | C                 | 4.46800100  | 1.81649100  | -1.63378100 |
| C                  | -5.70618600 | 2.93831100  | 0.18829700  | Mo                | 0.45627600  | 0.09668700  | -0.96593300 |
| C                  | -4.46197400 | 3.02158700  | -0.44164400 | O                 | 2.17276600  | 0.97888200  | -1.81391600 |
| C                  | -3.38057200 | 3.63629900  | 0.20607600  | O                 | 1.16614000  | -1.82821000 | -1.52309200 |
| C                  | -2.01756000 | 3.71264700  | -0.46967600 | C                 | 1.87660800  | -2.48457600 | -0.68649600 |
| C                  | -1.29983300 | 2.36120400  | -0.43000000 | C                 | 2.38834800  | -3.88519600 | -1.02619400 |
| O                  | -0.94348900 | 1.83589600  | -1.53906300 | O                 | 0.66031700  | 1.88120200  | 1.53295900  |
| O                  | -1.05989800 | 1.81142700  | 0.69002500  | O                 | -0.26855400 | 2.05832100  | -0.47975000 |
| O                  | -2.13200800 | 4.17165300  | -1.81112000 | C                 | -0.02162200 | 2.55609100  | 0.66148200  |
| H                  | -2.73106400 | 4.65791000  | 1.99156400  | C                 | -0.47263100 | 3.97590000  | 1.00670300  |
| H                  | -4.93713400 | 4.50675600  | 3.11425200  | O                 | -0.01091000 | -0.99970200 | 2.34621400  |
| H                  | -6.85025300 | 3.40418400  | 1.96152000  | O                 | -0.66120200 | 0.71889700  | 3.63986300  |
| H                  | -6.53868700 | 2.46135100  | -0.32260100 | C                 | -0.63430900 | -0.56590300 | 3.32951900  |
| H                  | -4.33205600 | 2.61763600  | -1.44220900 | C                 | -1.42462400 | -1.46585600 | 4.27026100  |
| H                  | -1.38644800 | 4.41014400  | 0.09872700  | H                 | -0.16624300 | 1.25454400  | 2.96305400  |
| H                  | -1.66101100 | 3.53364700  | -2.37885700 | C                 | 4.79369400  | 3.07030700  | -0.78817500 |
| C                  | -4.37606200 | -3.49870600 | 1.39067000  | H                 | 4.94330300  | 2.81144000  | 0.26458000  |
| C                  | -4.35543000 | -4.70001400 | 2.10850200  | H                 | 5.71305000  | 3.53477500  | -1.16337700 |
| C                  | -3.68342700 | -5.81202600 | 1.59232300  | H                 | 3.98885400  | 3.81221900  | -0.85086000 |
| C                  | -3.03315000 | -5.71827500 | 0.35538200  | C                 | 4.27959700  | 2.21202200  | -3.10802500 |
| C                  | -3.05213900 | -4.51749500 | -0.35827800 | H                 | 5.20299500  | 2.67008300  | -3.48105600 |
| C                  | -3.72215400 | -3.39837400 | 0.15707100  | H                 | 4.05425100  | 1.34144000  | -3.73264400 |
| C                  | -3.73071800 | -2.08317600 | -0.60993900 | H                 | 3.46715600  | 2.93646400  | -3.22853700 |
| C                  | -2.37744900 | -1.37283700 | -0.51966000 | C                 | 5.62193300  | 0.79290000  | -1.50489800 |
| O                  | -1.78476300 | -1.06552300 | -1.60927400 | H                 | 5.41594000  | -0.11415100 | -2.08538800 |
| O                  | -1.89483400 | -1.08739900 | 0.62046000  | H                 | 6.54825000  | 1.23741900  | -1.88724700 |

|                   |             |             |             |                   |             |             |             |
|-------------------|-------------|-------------|-------------|-------------------|-------------|-------------|-------------|
| O                 | -4.09206500 | -2.28778700 | -1.97064100 | H                 | 5.78299000  | 0.50625900  | -0.46088500 |
| H                 | -4.90521800 | -2.63750300 | 1.79227300  | C                 | 3.91288400  | -3.93340500 | -0.77596600 |
| H                 | -4.86917500 | -4.76670000 | 3.06397000  | H                 | 4.44395200  | -3.22376100 | -1.42166800 |
| H                 | -3.66929800 | -6.74706200 | 2.14622400  | H                 | 4.15253700  | -3.69748200 | 0.26525400  |
| H                 | -2.51211900 | -6.58041800 | -0.05300700 | H                 | 4.28840400  | -4.93922900 | -0.99773100 |
| H                 | -2.55350100 | -4.45092100 | -1.32169300 | C                 | 1.67741400  | -4.88996100 | -0.08672000 |
| H                 | -4.45913000 | -1.40957900 | -0.13619500 | H                 | 2.03054800  | -5.90509400 | -0.30342900 |
| H                 | -3.43407600 | -1.82286800 | -2.52022700 | H                 | 1.88956600  | -4.66875000 | 0.96421600  |
| C                 | 3.89893400  | 3.83608200  | 1.59847700  | H                 | 0.59090800  | -4.87050300 | -0.23273000 |
| C                 | 3.67933200  | 5.14096200  | 2.05424700  | C                 | 2.08612600  | -4.23839500 | -2.49233000 |
| C                 | 3.09816100  | 6.08956900  | 1.20739900  | H                 | 1.01057700  | -4.22686600 | -2.69560500 |
| C                 | 2.73848600  | 5.72844300  | -0.09705300 | H                 | 2.56915500  | -3.53691700 | -3.18124500 |
| C                 | 2.95584500  | 4.42467400  | -0.54937100 | H                 | 2.46476700  | -5.24412000 | -2.70918600 |
| C                 | 3.53626300  | 3.46861500  | 0.29706200  | C                 | -1.30703600 | -2.93167300 | 3.82199500  |
| C                 | 3.76637300  | 2.03959600  | -0.18866000 | H                 | -1.70484000 | -3.07680300 | 2.81263800  |
| C                 | 2.44022500  | 1.28116600  | -0.24746700 | H                 | -0.26678700 | -3.27284500 | 3.83120300  |
| O                 | 1.96446600  | 0.99359100  | -1.39762900 | H                 | -1.88043800 | -3.56335300 | 4.50903600  |
| O                 | 1.84451200  | 0.97324700  | 0.83226800  | C                 | -2.90733000 | -1.01774300 | 4.24289600  |
| O                 | 4.41475500  | 1.99609300  | -1.45459600 | H                 | -3.48515000 | -1.66356600 | 4.91317000  |
| H                 | 4.35766800  | 3.10271500  | 2.25783100  | H                 | -3.02086000 | 0.01709300  | 4.57898900  |
| H                 | 3.96886000  | 5.41532700  | 3.06528100  | H                 | -3.33343400 | -1.10695100 | 3.23722700  |
| H                 | 2.93019300  | 7.10455200  | 1.55789300  | C                 | 0.78948300  | 4.87593200  | 0.97439400  |
| H                 | 2.28987300  | 6.46225100  | -0.76169700 | H                 | 1.25203800  | 4.87719700  | -0.01928400 |
| H                 | 2.68136000  | 4.15373400  | -1.56581300 | H                 | 0.50596700  | 5.90636200  | 1.21856400  |
| H                 | 4.40328200  | 1.52185100  | 0.53723600  | H                 | 1.53425300  | 4.54214500  | 1.70428900  |
| H                 | 3.75363700  | 1.71287700  | -2.11302900 | C                 | -1.49904600 | 4.48051300  | -0.02276500 |
| C                 | 3.76839900  | -4.03732500 | 1.58667300  | H                 | -2.39760600 | 3.85374700  | -0.03125400 |
| C                 | 5.03581500  | -3.86125200 | 2.15331200  | H                 | -1.79919000 | 5.50258600  | 0.23517000  |
| C                 | 6.05525800  | -3.25448900 | 1.41332200  | H                 | -1.08256800 | 4.49040200  | -1.03445000 |
| C                 | 5.80234400  | -2.82585300 | 0.10435400  | C                 | -1.08894700 | 4.00841200  | 2.42194800  |
| C                 | 4.53569500  | -3.00002500 | -0.45891500 | H                 | -1.96489000 | 3.35300900  | 2.49383300  |
| C                 | 3.50905900  | -3.60532700 | 0.28033300  | H                 | -0.36425700 | 3.71035500  | 3.18611200  |
| C                 | 2.11941700  | -3.78470800 | -0.32522400 | H                 | -1.41497700 | 5.02944300  | 2.65038200  |
| C                 | 1.36589500  | -2.45391000 | -0.33632200 | C                 | -0.85526100 | -1.29822100 | 5.70091700  |
| O                 | 1.12467000  | -1.91002800 | -1.46696600 | H                 | -0.94944100 | -0.26675300 | 6.05286000  |
| O                 | 1.00922400  | -1.92472000 | 0.76282800  | H                 | -1.41432400 | -1.94782700 | 6.38329300  |
| O                 | 2.17325700  | -4.33042300 | -1.63782600 | H                 | 0.20091000  | -1.58793200 | 5.74632500  |
| H                 | 2.98024800  | -4.51629500 | 2.16317900  | C                 | -5.48387600 | -0.87013100 | -3.00951100 |
| H                 | 5.22620500  | -4.20463900 | 3.16678500  | C                 | -6.50852600 | -0.02280400 | -3.44570700 |
| H                 | 7.04145400  | -3.12041700 | 1.84999100  | C                 | -6.87723400 | 1.08452900  | -2.67514000 |
| H                 | 6.59166000  | -2.35725100 | -0.47779300 | C                 | -6.21669900 | 1.33676400  | -1.46642700 |
| H                 | 4.34821000  | -2.67330100 | -1.47848100 | C                 | -5.19130100 | 0.49033100  | -1.03513100 |
| H                 | 1.54699600  | -4.47031300 | 0.31083800  | C                 | -4.81222300 | -0.61856200 | -1.80596000 |
| H                 | 1.87235100  | -3.63823000 | -2.25534600 | C                 | -3.67376300 | -1.52435600 | -1.35889100 |
|                   |             |             |             | C                 | -2.29591100 | -0.90781200 | -1.71287600 |
|                   |             |             |             | O                 | -1.52674300 | -0.72148400 | -0.68528100 |
|                   |             |             |             | O                 | -2.01163100 | -0.65612500 | -2.89065700 |
|                   |             |             |             | O                 | -3.74966800 | -1.81373500 | 0.03465600  |
|                   |             |             |             | H                 | -5.20509100 | -1.73333600 | -3.60976800 |
|                   |             |             |             | H                 | -7.02085300 | -0.23231400 | -4.38139800 |
|                   |             |             |             | H                 | -7.67528300 | 1.74239000  | -3.00966500 |
|                   |             |             |             | H                 | -6.50067300 | 2.19287200  | -0.85939700 |
|                   |             |             |             | H                 | -4.68652600 | 0.68524200  | -0.09281200 |
|                   |             |             |             | H                 | -3.73795400 | -2.46539100 | -1.92216200 |
|                   |             |             |             | H                 | -2.88544400 | -1.53447100 | 0.39881300  |
| <b>MA-chel-1b</b> |             |             |             | <b>MA-chel-1c</b> |             |             |             |
| Mo                | 1.37095800  | 0.97618000  | 0.15687100  | Mo                | -0.98685300 | 0.18398400  | -1.04737500 |
| O                 | 0.25730100  | 2.49132600  | 1.32052000  | O                 | -0.25859100 | -1.65852200 | -1.80258200 |
| O                 | 2.34860300  | -0.03986700 | 1.70318900  | O                 | -2.95159700 | -0.53849500 | -1.08657100 |
| C                 | 1.95806800  | -1.21450100 | 2.02971300  | C                 | -3.43351600 | -1.10947400 | -0.04450600 |



|    |             |             |             |    |             |             |             |
|----|-------------|-------------|-------------|----|-------------|-------------|-------------|
| C  | 2.56266300  | -1.94593800 | 3.22515800  | C  | -4.87713900 | -1.60797600 | -0.05883000 |
| Mo | 0.08363500  | -0.70425200 | -.17606400  | Mo | -0.73851100 | -0.48764600 | 0.96719800  |
| O  | 1.01642300  | -1.76924100 | 1.35921000  | O  | -2.70196800 | -1.23644600 | 0.99635700  |
| O  | 0.48318700  | 2.77991900  | -0.83654800 | O  | -0.02282900 | -2.37633400 | 0.28835100  |
| C  | 0.07313800  | 3.22936300  | 0.28802100  | C  | 0.07729400  | -2.57440700 | -0.97060200 |
| C  | -0.60684600 | 4.58879700  | 0.42242200  | C  | 0.59185500  | -3.90905400 | -1.51306100 |
| O  | 2.73955600  | 0.24529300  | -1.25794100 | O  | -1.65496600 | 2.13091600  | -0.35888600 |
| O  | 1.40851200  | -1.48749000 | -1.59086500 | O  | -1.45090400 | 1.38575900  | 1.72419000  |
| C  | 2.47626500  | -0.83985700 | -1.88272200 | C  | -1.75685400 | 2.31776100  | 0.91666800  |
| C  | 3.38114700  | -1.34310700 | -3.00450500 | C  | -2.22819600 | 3.66266300  | 1.47201200  |
| C  | -2.03190900 | 4.36002800  | 0.98041500  | O  | 0.90467100  | 1.18064700  | -1.73372500 |
| H  | -2.63489800 | 3.75188000  | 0.29575700  | O  | 0.29671300  | 3.34452300  | -1.82629200 |
| H  | -2.00170500 | 3.85902700  | 1.95295600  | C  | 1.13224600  | 2.35150500  | -2.08250600 |
| H  | -2.53337400 | 5.32695900  | 1.10514500  | C  | 2.38544100  | 2.76172400  | -2.84463000 |
| C  | -0.68171200 | 5.30036800  | -0.93867600 | H  | -0.48612900 | 3.02287400  | -1.30222500 |
| H  | -1.17791500 | 6.27017700  | -0.81537000 | C  | -5.80580200 | -0.37501000 | -0.18201300 |
| H  | 0.31593600  | 5.47859900  | -1.35405700 | H  | -5.60281000 | 0.18461800  | -1.10073300 |
| H  | -1.25277000 | 4.71511500  | -1.66699500 | H  | -6.85067500 | -0.70625600 | -0.20391300 |
| C  | 0.20967400  | 5.44070600  | 1.42283900  | H  | -5.68262500 | 0.30230300  | 0.67133100  |
| H  | 1.23051500  | 5.61100600  | 1.06012700  | C  | -5.19951500 | -2.37748900 | 1.23381900  |
| H  | -0.27226900 | 6.41741400  | 1.54791900  | H  | -6.23956100 | -2.72220000 | 1.20059900  |
| H  | 0.26722600  | 4.95634100  | 2.40247600  | H  | -4.55376800 | -3.25462000 | 1.35017100  |
| C  | 3.63502600  | -2.85473700 | -2.81447200 | H  | -5.07700200 | -1.74596000 | 2.11961600  |
| H  | 2.69804200  | -3.41958700 | -2.81713700 | C  | -5.07394500 | -2.52894100 | -1.28475800 |
| H  | 4.26373800  | -3.22480000 | -3.63261500 | H  | -4.41905700 | -3.40673500 | -1.23109800 |
| H  | 4.15523200  | -3.05414200 | -1.87007300 | H  | -6.11153000 | -2.88149300 | -1.31366100 |
| C  | 2.63732900  | -1.10544000 | -4.34317900 | H  | -4.86385600 | -1.99860500 | -2.21857900 |
| H  | 2.43320900  | -0.03990100 | -4.50132300 | C  | -0.53882000 | -4.55655300 | -2.34823800 |
| H  | 3.26000100  | -1.45863400 | -5.17350600 | H  | -1.42294100 | -4.75812400 | -1.73160700 |
| H  | 1.68699900  | -1.64868700 | -4.37089400 | H  | -0.83733800 | -3.91055400 | -3.17987700 |
| C  | 4.71723000  | -0.57990300 | -3.00754700 | H  | -0.18879100 | -5.51028400 | -2.76056800 |
| H  | 5.34915200  | -0.95837400 | -3.81926000 | C  | 1.81176200  | -3.63174700 | -2.42212700 |
| H  | 4.56780200  | 0.49318600  | -3.16243500 | H  | 2.18588200  | -4.57790700 | -2.83064800 |
| H  | 5.25778600  | -0.71570100 | -2.06419300 | H  | 1.54349700  | -2.97756700 | -3.25735700 |
| C  | 3.00232500  | -3.35815800 | 2.77594800  | H  | 2.62616300  | -3.15894300 | -1.86058300 |
| H  | 3.41711900  | -3.90096500 | 3.63323300  | C  | 0.99664300  | -4.84920000 | -0.36524000 |
| H  | 2.15750600  | -3.93088100 | 2.38146100  | H  | 1.79924800  | -4.41821800 | 0.24237400  |
| H  | 3.77631000  | -3.30557400 | 2.00107100  | H  | 0.15034600  | -5.06526200 | 0.29504900  |
| C  | 1.46443600  | -2.06596800 | 4.31090900  | H  | 1.35575500  | -5.79759500 | -0.78195800 |
| H  | 1.86945500  | -2.59459100 | 5.18175900  | C  | 3.27153200  | 1.53325600  | -3.10584300 |
| H  | 1.12265300  | -1.07823200 | 4.64206700  | H  | 3.59335300  | 1.06276200  | -2.17162600 |
| H  | 0.59965300  | -2.62568800 | 3.94028700  | H  | 2.74800100  | 0.78120400  | -3.70505700 |
| C  | 3.76870800  | -1.17141300 | 3.78374000  | H  | 4.16507000  | 1.84701800  | -3.65658300 |
| H  | 3.48209000  | -0.17140400 | 4.12453700  | C  | 3.15410000  | 3.80622000  | -1.99802400 |
| H  | 4.18583200  | -1.71732900 | 4.63779900  | H  | 4.05995800  | 4.10396100  | -2.53751100 |
| H  | 4.55767100  | -1.06148500 | 3.03176300  | H  | 2.55028600  | 4.70082400  | -1.81921400 |
| C  | -5.47308000 | -0.97484700 | 0.88928200  | H  | 3.45654900  | 3.38992800  | -1.03052100 |
| C  | -6.25986100 | -2.08524500 | 1.21529300  | C  | -3.34884800 | 3.40113100  | 2.50473300  |
| C  | -6.36241000 | -3.15701100 | 0.32308400  | H  | -2.99696700 | 2.76101200  | 3.31888800  |
| C  | -5.67598600 | -3.11279600 | -0.89670700 | H  | -3.67959300 | 4.35477700  | 2.93195200  |
| C  | -4.88849600 | -2.00464800 | -1.21955800 | H  | -4.21601400 | 2.92014700  | 2.03674800  |
| C  | -4.77996900 | -0.92868600 | -0.32655400 | C  | -1.02171000 | 4.33070400  | 2.17816500  |
| C  | -3.90924500 | 0.27531700  | -0.66844600 | H  | -0.20094100 | 4.51994300  | 1.47637200  |
| C  | -2.42957200 | -0.04830800 | -0.45766000 | H  | -1.33479500 | 5.29289300  | 2.59987600  |
| O  | -1.64944300 | -0.05575300 | -1.46847900 | H  | -0.64382200 | 3.70415700  | 2.99235700  |
| O  | -1.96803000 | -0.30719700 | 0.69594100  | C  | -2.75530300 | 4.57854300  | 0.35386700  |
| O  | -4.12019200 | 0.72341400  | -2.00231400 | H  | -1.97566700 | 4.83178500  | -0.37187800 |
| H  | -5.40251500 | -0.13981400 | 1.58253400  | H  | -3.58769600 | 4.11527300  | -0.18670200 |
| H  | -6.79673200 | -2.10750700 | 2.16007800  | H  | -3.11558400 | 5.51481400  | 0.79525300  |
| H  | -6.97677700 | -4.01822400 | 0.57235000  | C  | 1.94835100  | 3.39769500  | -4.18819900 |

|                   |             |             |             |                  |             |             |             |
|-------------------|-------------|-------------|-------------|------------------|-------------|-------------|-------------|
| H                 | -5.75497800 | -3.94058100 | -1.59675400 | H                | 1.33768900  | 4.29152300  | -4.03073500 |
| H                 | -4.36550400 | -1.96999500 | -2.17164200 | H                | 2.84245700  | 3.68557300  | -4.75204800 |
| H                 | -4.15350700 | 1.09171700  | 0.02314700  | H                | 1.37727400  | 2.68804000  | -4.79800800 |
| H                 | -3.27275500 | 0.62236400  | -2.47656200 | C                | 4.83547900  | 0.63265300  | 1.12042500  |
|                   |             |             |             | C                | 5.76578400  | 0.25575800  | 0.14439500  |
|                   |             |             |             | C                | 6.08715700  | -1.09301900 | -0.03250700 |
|                   |             |             |             | C                | 5.47383400  | -2.06205100 | 0.77219100  |
|                   |             |             |             | C                | 4.54521000  | -1.68218600 | 1.74408800  |
|                   |             |             |             | C                | 4.21408100  | -0.33018500 | 1.92514200  |
|                   |             |             |             | C                | 3.20812100  | 0.08431000  | 2.98861600  |
|                   |             |             |             | C                | 1.77684100  | -0.40874600 | 2.66150600  |
|                   |             |             |             | O                | 1.23487900  | -1.19734000 | 3.45998300  |
|                   |             |             |             | O                | 1.26203900  | 0.06012400  | 1.58177600  |
|                   |             |             |             | O                | 3.58027700  | -0.40844600 | 4.27386100  |
|                   |             |             |             | H                | 4.59411700  | 1.68436900  | 1.25850500  |
|                   |             |             |             | H                | 6.24185900  | 1.01583600  | -0.46991200 |
|                   |             |             |             | H                | 6.81122300  | -1.38853700 | -0.78750700 |
|                   |             |             |             | H                | 5.72021000  | -3.11293500 | 0.64212900  |
|                   |             |             |             | H                | 4.07922400  | -2.43885300 | 2.37067100  |
|                   |             |             |             | H                | 3.17062000  | 1.18089400  | 3.02530200  |
|                   |             |             |             | H                | 2.82535800  | -0.97047900 | 4.55141100  |
| <b>MA-chel-1d</b> |             |             |             | <b>MA-chel-2</b> |             |             |             |
| Mo                | -1.19967900 | 0.54387000  | -0.93374100 | Mo               | 0.99998900  | 0.78798200  | -0.32060000 |
| O                 | -0.09842600 | 2.25076600  | -1.04247400 | O                | 0.51627700  | 2.28466100  | -1.69698100 |
| O                 | -2.22332800 | 1.41384900  | 0.70723500  | C                | -0.70354600 | 2.64861900  | -1.83122100 |
| C                 | -1.97552700 | 1.01704200  | 1.90115500  | C                | -1.11410700 | 3.66642500  | -2.89161100 |
| C                 | -2.67561000 | 1.69849800  | 3.07174100  | Mo               | -1.05067800 | 0.62329700  | 0.27341100  |
| Mo                | -0.18332800 | -0.83985200 | 0.47384100  | O                | -1.59875500 | 2.12217700  | -1.07968600 |
| O                 | -1.15582500 | 0.05906000  | 2.10304100  | O                | 1.34544900  | 2.23562200  | 1.13382500  |
| O                 | 2.04148100  | 1.88830500  | -1.60395200 | O                | -0.76823400 | 2.06737900  | 1.76091300  |
| C                 | 1.13635400  | 2.64927500  | -1.24292400 | C                | 0.39182500  | 2.58520700  | 1.91846300  |
| C                 | 1.35215900  | 4.16108700  | -1.03380700 | C                | 0.66894500  | 3.58592900  | 3.03661700  |
| O                 | -2.89211400 | -0.73986200 | -0.96721500 | C                | -2.03204700 | 2.94593900  | -3.90974100 |
| O                 | -1.85983900 | -2.14196100 | 0.40963100  | H                | -2.92744200 | 2.54628800  | -3.42322400 |
| C                 | -2.88558000 | -1.82237200 | -0.27561600 | H                | -2.34746100 | 3.65676200  | -4.68231000 |
| C                 | -4.12100100 | -2.71815700 | -0.28914400 | H                | -1.50710800 | 2.11941600  | -4.40319000 |
| O                 | -0.74202700 | -0.00007500 | -2.78920900 | C                | -1.89734000 | 4.80932900  | -2.20520200 |
| O                 | 0.80776400  | -0.61843200 | -4.26694100 | H                | -1.27309800 | 5.33385900  | -1.47214000 |
| C                 | -0.09716100 | -0.92576400 | -3.50066300 | H                | -2.21716700 | 5.53668300  | -2.96037600 |
| C                 | -0.60017900 | -2.34187800 | -3.33539900 | H                | -2.78707600 | 4.43023400  | -1.69317800 |
| H                 | -0.03724400 | -3.01937200 | -3.98011100 | C                | 0.12238800  | 4.23303700  | -3.61006400 |
| H                 | -1.66411300 | -2.39025000 | -3.58986700 | H                | 0.69033300  | 3.44541900  | -4.11576300 |
| H                 | -0.49571900 | -2.65867900 | -2.29229100 | H                | -0.19903200 | 4.96049000  | -4.36428900 |
| C                 | -2.20526500 | 1.10771000  | 4.41160000  | H                | 0.79470200  | 4.74183800  | -2.91093100 |
| H                 | -1.12806200 | 1.24277400  | 4.55420100  | C                | -0.61832400 | 3.89957300  | 3.81798000  |
| H                 | -2.72431200 | 1.61733400  | 5.23109400  | H                | -1.03695700 | 3.00010500  | 4.28113900  |
| H                 | -2.42705200 | 0.03783500  | 4.48008300  | H                | -0.39260900 | 4.61961000  | 4.61292100  |
| C                 | -2.35414500 | 3.21083900  | 3.01381700  | H                | -1.38512500 | 4.33698000  | 3.16979100  |
| H                 | -2.69659000 | 3.65533000  | 2.07472300  | C                | 1.23500300  | 4.88085500  | 2.40769500  |
| H                 | -2.86201900 | 3.71692100  | 3.84240900  | H                | 1.45957100  | 5.60319800  | 3.20102400  |
| H                 | -1.27796300 | 3.39329300  | 3.11282300  | H                | 2.15632000  | 4.68252900  | 1.85138200  |
| C                 | -4.19995500 | 1.48422000  | 2.90218700  | H                | 0.51043200  | 5.34078900  | 1.72532800  |
| H                 | -4.45857500 | 0.41981800  | 2.93540300  | C                | 1.72420400  | 2.96543700  | 3.98441800  |
| H                 | -4.72524600 | 1.98590100  | 3.72262500  | H                | 2.65554000  | 2.74655200  | 3.45273800  |
| H                 | -4.55880800 | 1.90075700  | 1.95623800  | H                | 1.94640700  | 3.67110700  | 4.79330000  |
| C                 | -5.32370700 | -1.88621000 | 0.21762900  | H                | 1.35605200  | 2.03663400  | 4.43596900  |
| H                 | -5.49771000 | -1.01065000 | -0.41493300 | C                | -4.51403600 | -3.69813100 | -0.83980600 |
| H                 | -6.22406300 | -2.51066100 | 0.20048900  | C                | -5.90948600 | -3.69468200 | -0.94485200 |
| H                 | -5.16735000 | -1.54633200 | 1.24776300  | C                | -6.69308300 | -3.31107600 | 0.14788700  |
| C                 | -4.37907600 | -3.16567100 | -1.74809000 | C                | -6.07529800 | -2.93281200 | 1.34632800  |

|   |             |             |             |   |             |             |             |
|---|-------------|-------------|-------------|---|-------------|-------------|-------------|
| H | -4.53364900 | -2.30683200 | -2.40811900 | C | -4.68183900 | -2.93403900 | 1.44882000  |
| H | -3.54371200 | -3.75971200 | -2.13631400 | C | -3.89142700 | -3.31464700 | 0.35441200  |
| H | -5.27913400 | -3.79006000 | -1.77711600 | C | -2.36940500 | -3.30157000 | 0.45765300  |
| C | -3.91391800 | -3.94894000 | 0.60979500  | C | -1.84081200 | -1.87021000 | 0.36485000  |
| H | -4.81385700 | -4.57336800 | 0.57820800  | O | -1.30553200 | -1.34159100 | 1.39471200  |
| H | -3.06642300 | -4.55484300 | 0.27303600  | O | -1.93530800 | -1.19971000 | -0.71017300 |
| H | -3.73505600 | -3.66131500 | 1.65105000  | O | -1.90779200 | -3.90889100 | 1.65892300  |
| C | 1.00090100  | 4.51505400  | 0.42954300  | H | -3.90856200 | -4.00484200 | -1.68964500 |
| H | -0.04190500 | 4.27520800  | 0.65751100  | H | -6.38125200 | -3.99873300 | -1.87561300 |
| H | 1.64257200  | 3.97342000  | 1.13529500  | H | -7.77712100 | -3.31193900 | 0.06968300  |
| H | 1.15124700  | 5.58897500  | 0.59372800  | H | -6.67860000 | -2.63782500 | 2.20104400  |
| C | 0.41279800  | 4.92960000  | -1.99226300 | H | -4.20766400 | -2.64868500 | 2.38424100  |
| H | 0.55967800  | 6.00868300  | -1.86280800 | H | -1.95450900 | -3.85142400 | -0.39578100 |
| H | 0.62548200  | 4.68383200  | -3.03999400 | H | -1.49324500 | -3.20668800 | 2.19572800  |
| H | -0.63734900 | 4.69817800  | -1.79040300 | C | 4.71340400  | -3.34487100 | 0.79799500  |
| C | 2.81359000  | 4.53844800  | -1.32533800 | C | 6.08173900  | -3.27574700 | 1.08238600  |
| H | 3.09369500  | 4.29319400  | -2.35530200 | C | 6.96945300  | -2.76263200 | 0.13155300  |
| H | 2.94925200  | 5.61713000  | -1.18194900 | C | 6.48278500  | -2.32029800 | -1.10471600 |
| H | 3.50519900  | 4.01842600  | -0.65363400 | C | 5.11566700  | -2.38694200 | -1.38612200 |
| C | 5.24296200  | -2.61077200 | 0.13165400  | C | 4.22123500  | -2.89751500 | -0.43430400 |
| C | 6.03132800  | -3.39897200 | 0.97703100  | C | 2.72756000  | -2.95692900 | -0.73021600 |
| C | 6.29626100  | -2.97573000 | 2.28330100  | C | 2.07766400  | -1.58221400 | -0.56357000 |
| C | 5.76908300  | -1.76172900 | 2.74037300  | O | 1.51300600  | -1.03930600 | -1.57092100 |
| C | 4.97616900  | -0.97797200 | 1.89804300  | O | 2.08054500  | -0.98336500 | 0.55667900  |
| C | 4.70808300  | -1.39856400 | 0.58662200  | O | 2.46756500  | -3.45882300 | -2.03554400 |
| C | 3.83920000  | -0.55269000 | -0.33118300 | H | 4.02739700  | -3.75244100 | 1.53706600  |
| C | 2.36196900  | -0.73494500 | 0.02838600  | H | 6.45221500  | -3.62994900 | 2.04086100  |
| O | 1.78284200  | 0.03879400  | 0.86192400  | H | 8.03328900  | -2.71282500 | 0.34847600  |
| O | 1.67202300  | -1.65385800 | -0.52609300 | H | 7.16805900  | -1.92480100 | -1.85005700 |
| O | 4.22284800  | 0.80836100  | -0.23631000 | H | 4.74305800  | -2.05247400 | -2.35068100 |
| H | 5.04873400  | -2.93781400 | -0.88716600 | H | 2.25115700  | -3.61482800 | 0.00901900  |
| H | 6.44365900  | -4.33579100 | 0.61152700  | H | 1.95391200  | -2.77621700 | -2.50837400 |
| H | 6.91312400  | -3.58397700 | 2.93967900  |   |             |             |             |
| H | 5.97518500  | -1.42539400 | 3.75330300  |   |             |             |             |
| H | 4.57157000  | -0.03444100 | 2.25208700  |   |             |             |             |
| H | 3.94378400  | -0.92501000 | -1.35886900 |   |             |             |             |
| H | 3.55742800  | 1.34072700  | -0.72642300 |   |             |             |             |

**Table 3SI.** The Cartesian Coordinates of *S*-1-amino-2-propanol (APol) substituted dimolybdenum *tetrakis*( $\mu$ -pivalate) Mo<sub>2</sub> complexes.

| APol-bridge-1 |             |             |             | APol-bridge-2cis-a |             |             |             |
|---------------|-------------|-------------|-------------|--------------------|-------------|-------------|-------------|
| Mo            | -0.00572400 | -0.39223700 | -0.98156100 | Mo                 | 0.58217500  | 0.04335000  | -0.91728600 |
| O             | -2.15389600 | -0.30535700 | -0.98567200 | O                  | -1.04214000 | -1.40451300 | -1.13722600 |
| O             | 2.14099400  | -0.38058600 | -1.03564600 | O                  | -0.94834300 | 1.56412400  | -1.08814400 |
| O             | 0.02540000  | 1.74546600  | -1.18033500 | C                  | -1.61499800 | -1.85064900 | -0.08883700 |
| C             | -2.76701100 | -0.22444800 | 0.13341500  | C                  | -2.80729300 | -2.81040700 | -0.21053000 |
| C             | -4.29903200 | -0.17659900 | 0.12744000  | Mo                 | 0.32267100  | -0.00289800 | 1.20103900  |
| Mo            | 0.02008300  | -0.23582600 | 1.14034900  | C                  | -1.52020700 | 1.98282800  | -0.02447400 |
| C             | 2.78014000  | -0.33313300 | 0.06959200  | O                  | -1.21542100 | -1.51048100 | 1.07904500  |
| C             | 0.03681500  | 2.45524700  | -0.11449000 | O                  | -1.18120900 | 1.53302100  | 1.12455700  |
| O             | -2.12288700 | -0.20134600 | 1.23783300  | C                  | -2.61656600 | 3.04811700  | -0.14823900 |
| O             | 2.15897200  | -0.30466000 | 1.18924600  | C                  | -1.96134900 | 4.35066200  | -0.66722600 |
| O             | 0.04986700  | 1.90003300  | 1.03573200  | H                  | -2.72646400 | 5.12729200  | -0.78970800 |
| C             | 4.31123700  | -0.26571400 | 0.07163500  | H                  | -1.20974800 | 4.72583600  | 0.03837900  |
| C             | 0.02925100  | 3.98140900  | -0.24623700 | H                  | -1.47411300 | 4.18900100  | -1.63382200 |
| C             | 4.71018000  | 1.18816400  | 0.42812600  | C                  | -3.66784000 | 2.56170000  | -1.17116600 |
| H             | 4.32447000  | 1.47379100  | 1.41249900  | H                  | -4.14798200 | 1.63435900  | -0.83579200 |
| H             | 5.80334400  | 1.27709900  | 0.44693600  | H                  | -4.44846800 | 3.32302800  | -1.29049000 |
| H             | 4.32536800  | 1.89802700  | -0.31355100 | H                  | -3.21125400 | 2.37641100  | -2.14781800 |
| C             | 4.87810000  | -0.63478600 | -1.31018200 | C                  | -3.29125000 | 3.30997100  | 1.20882900  |
| H             | 5.97295500  | -0.57387800 | -1.28508600 | H                  | -2.57300300 | 3.66889400  | 1.95339100  |
| H             | 4.60020600  | -1.65530500 | -1.59655100 | H                  | -4.07021000 | 4.07310900  | 1.09002200  |
| H             | 4.51365200  | 0.04301500  | -2.08791800 | H                  | -3.76051800 | 2.40272300  | 1.60468700  |
| C             | 4.86685900  | -1.22780800 | 1.14323500  | C                  | -4.04931000 | -2.12271300 | 0.40306600  |
| H             | 4.59377200  | -2.26727200 | 0.92343200  | H                  | -3.88336200 | -1.87167500 | 1.45560200  |
| H             | 5.96152100  | -1.16457600 | 1.16437200  | H                  | -4.29738000 | -1.20040700 | -0.13597400 |
| H             | 4.48716800  | -0.97642300 | 2.13798600  | H                  | -4.91480000 | -2.79398300 | 0.33945000  |
| C             | 1.27332400  | 4.40703300  | -1.06047600 | C                  | -2.49094600 | -4.09983800 | 0.58064700  |
| H             | 1.27730700  | 5.49653400  | -1.18750400 | H                  | -3.34103300 | -4.79050900 | 0.51978900  |
| H             | 2.19994900  | 4.12268100  | -0.54729600 | H                  | -1.61229600 | -4.61245100 | 0.16962400  |
| H             | 1.27349700  | 3.94321700  | -2.05169000 | H                  | -2.29962500 | -3.88035300 | 1.63573400  |
| C             | -1.25014600 | 4.39579800  | -1.01062400 | C                  | -3.08160700 | -3.15900000 | -1.68341000 |
| H             | -2.15324200 | 4.10105300  | -0.46248900 | H                  | -2.21483800 | -3.63986900 | -2.14896600 |
| H             | -1.27003400 | 5.48544900  | -1.13487900 | H                  | -3.93170700 | -3.84971100 | -1.74543600 |
| H             | -1.28464900 | 3.93381700  | -2.00207800 | H                  | -3.32222800 | -2.26569000 | -2.26864400 |
| C             | 0.05288800  | 4.65437000  | 1.13618800  | C                  | 4.26480400  | 2.27606900  | -1.15309500 |
| H             | 0.94981500  | 4.37900800  | 1.70105000  | C                  | 3.17596100  | 1.50031100  | -0.40335700 |
| H             | 0.04694400  | 5.74427600  | 1.01334700  | C                  | 3.01641000  | 2.07763300  | 1.02499300  |
| H             | -0.82054500 | 4.37308600  | 1.73395600  | O                  | 1.97205800  | 1.52102200  | -1.12771200 |
| C             | -4.75237500 | 1.00394800  | -0.76161100 | N                  | 1.66401400  | 1.82257200  | 1.60917500  |
| H             | -4.39338500 | 1.96091600  | -0.36398200 | H                  | 4.44791800  | 1.81661200  | -2.13048100 |
| H             | -4.37809300 | 0.89545100  | -1.78393300 | H                  | 3.95013900  | 3.31515000  | -1.31378200 |
| H             | -5.84802400 | 1.04112500  | -0.79507700 | H                  | 5.20993100  | 2.28351500  | -0.59229300 |
| C             | -4.85225300 | -0.00083000 | 1.55154400  | H                  | 3.51310300  | 0.45705700  | -0.30500900 |
| H             | -5.94800100 | 0.03114500  | 1.51720000  | H                  | 3.76217900  | 1.62784900  | 1.69066500  |
| H             | -4.55581000 | -0.82926100 | 2.20355800  | H                  | 3.19143400  | 3.16244000  | 1.01443000  |
| H             | -4.49777100 | 0.92958900  | 2.00791400  | H                  | 1.04094900  | 2.54205000  | 1.23873800  |
| C             | -4.81785900 | -1.50328600 | -0.47685500 | H                  | 1.71053100  | 2.01213000  | 2.61182900  |
| H             | -4.51183100 | -2.36360700 | 0.13118700  | C                  | 3.98458300  | -2.39211800 | -0.52217400 |
| H             | -5.91399700 | -1.48956600 | -0.51339900 | C                  | 2.45435400  | -2.51879400 | -0.63867500 |
| H             | -4.43905100 | -1.64882600 | -1.49319100 | C                  | 1.79998100  | -2.83576700 | 0.72010700  |
| C             | -0.18829800 | -4.74798400 | -1.37886000 | O                  | 1.91653200  | -1.41372900 | -1.31244800 |
| C             | -0.41376900 | -3.44921900 | -0.59310500 | N                  | 1.80317800  | -1.68683800 | 1.67967400  |
| C             | 0.37989400  | -3.49273400 | 0.72497700  | H                  | 4.40962300  | -2.18859100 | -1.51027000 |
| O             | -0.07075600 | -2.35665000 | -1.40243300 | H                  | 4.28185200  | -1.56639700 | 0.13665500  |
| N             | -0.04944900 | -2.44575600 | 1.70269400  | H                  | 4.42885000  | -3.31963500 | -0.13751200 |

|                           |             |             |             |   |            |             |             |
|---------------------------|-------------|-------------|-------------|---|------------|-------------|-------------|
| H                         | -0.72535400 | -4.69572800 | -2.33162300 | H | 2.25947400 | -3.42111200 | -1.24823800 |
| H                         | 0.87835600  | -4.88507300 | -1.59751400 | H | 0.75618700 | -3.11926300 | 0.57602200  |
| H                         | -0.54780700 | -5.62435700 | -0.82469700 | H | 2.32554800 | -3.69334800 | 1.16242700  |
| H                         | -1.48849000 | -3.39008600 | -0.32987100 | H | 2.75994800 | -1.35073000 | 1.79552500  |
| H                         | 0.26477100  | -4.48021700 | 1.19043800  | H | 1.53730600 | -2.04644100 | 2.59837500  |
| H                         | 1.44111400  | -3.33282500 | 0.51223800  |   |            |             |             |
| H                         | -1.00478200 | -2.65279300 | 2.00163600  |   |            |             |             |
| H                         | 0.52048800  | -2.55232400 | 2.54453700  |   |            |             |             |
| <b>APol-bridge-2cis-b</b> |             |             |             |   |            |             |             |
| Mo                        | -0.10249000 | -0.44331300 | -.05619600  |   |            |             |             |
| O                         | -1.66826600 | 1.00976300  | -0.90219100 |   |            |             |             |
| O                         | 1.32632200  | 1.15998300  | -1.26581000 |   |            |             |             |
| C                         | -1.99622700 | 1.44991600  | 0.25280000  |   |            |             |             |
| C                         | -3.09650200 | 2.51259500  | 0.35451300  |   |            |             |             |
| Mo                        | 0.14548000  | -0.45636600 | 1.06143000  |   |            |             |             |
| C                         | 1.85236500  | 1.63807700  | -0.19995000 |   |            |             |             |
| O                         | -1.42773000 | 0.99901600  | 1.30586500  |   |            |             |             |
| O                         | 1.56186900  | 1.15034500  | 0.94405900  |   |            |             |             |
| C                         | 2.85371600  | 2.79238700  | -0.32353900 |   |            |             |             |
| C                         | 4.06672400  | 2.29354400  | -1.14454800 |   |            |             |             |
| H                         | 4.79683500  | 3.10419800  | -1.25910700 |   |            |             |             |
| H                         | 4.56858500  | 1.45685600  | -0.64288300 |   |            |             |             |
| H                         | 3.75940500  | 1.96463200  | -2.14256100 |   |            |             |             |
| C                         | 2.17349500  | 3.96056100  | -1.07319400 |   |            |             |             |
| H                         | 1.30670400  | 4.33698000  | -0.51661000 |   |            |             |             |
| H                         | 2.88356700  | 4.78803900  | -1.19405200 |   |            |             |             |
| H                         | 1.83328700  | 3.64826100  | -2.06526700 |   |            |             |             |
| C                         | 3.32420000  | 3.26501900  | 1.06226400  |   |            |             |             |
| H                         | 3.82108300  | 2.46020100  | 1.61379000  |   |            |             |             |
| H                         | 4.03599800  | 4.09158000  | 0.94580900  |   |            |             |             |
| H                         | 2.48511200  | 3.61973000  | 1.67018800  |   |            |             |             |
| C                         | -2.71093900 | 3.71327600  | -0.53918100 |   |            |             |             |
| H                         | -1.77535100 | 4.17479900  | -0.20068700 |   |            |             |             |
| H                         | -2.58252000 | 3.40472700  | -1.58106500 |   |            |             |             |
| H                         | -3.49894900 | 4.47536700  | -0.49710600 |   |            |             |             |
| C                         | -3.27396700 | 2.98170100  | 1.80858100  |   |            |             |             |
| H                         | -4.06029600 | 3.74514600  | 1.85493400  |   |            |             |             |
| H                         | -3.56190400 | 2.15456200  | 2.46587500  |   |            |             |             |
| H                         | -2.35037500 | 3.41778600  | 2.20406100  |   |            |             |             |
| C                         | -4.41751000 | 1.89315600  | -0.16070200 |   |            |             |             |
| H                         | -4.71799500 | 1.03296700  | 0.45035400  |   |            |             |             |
| H                         | -5.22119300 | 2.63831100  | -0.11174000 |   |            |             |             |
| H                         | -4.31890800 | 1.55927200  | -1.19849500 |   |            |             |             |
| C                         | 3.48070600  | -3.30024400 | 1.39083900  |   |            |             |             |
| C                         | 2.61528500  | -2.28026100 | 0.63679800  |   |            |             |             |
| C                         | 2.10412900  | -2.90681900 | -0.67483000 |   |            |             |             |
| O                         | 1.57475400  | -1.84781600 | 1.46994600  |   |            |             |             |
| N                         | 1.55544500  | -1.90881900 | -1.64140400 |   |            |             |             |
| H                         | 3.81718400  | -2.86623900 | 2.33852600  |   |            |             |             |
| H                         | 2.90000400  | -4.20372600 | 1.61876800  |   |            |             |             |
| H                         | 4.36507000  | -3.59201000 | 0.80987700  |   |            |             |             |
| H                         | 3.26076400  | -1.42132800 | 0.36392800  |   |            |             |             |
| H                         | 2.91745900  | -3.46209600 | -1.16085900 |   |            |             |             |
| H                         | 1.30079300  | -3.61198200 | -0.44113100 |   |            |             |             |
| H                         | -0.85179800 | -2.61163300 | 2.37427600  |   |            |             |             |
| H                         | 2.32949000  | -1.36176100 | -2.02233800 |   |            |             |             |
| C                         | -3.20883300 | -3.52240100 | -1.42368200 |   |            |             |             |
| C                         | -2.39436700 | -2.47677200 | -0.64912500 |   |            |             |             |
| C                         | -1.82712300 | -3.10893400 | 0.63642400  |   |            |             |             |
| O                         | -1.39136800 | -1.95832800 | -1.48031500 |   |            |             |             |

|                             |             |             |             |                             |             |             |             |
|-----------------------------|-------------|-------------|-------------|-----------------------------|-------------|-------------|-------------|
| N                           | -1.33484100 | -2.10659700 | 1.62865700  |                             |             |             |             |
| H                           | -3.58182600 | -3.08086600 | -2.35409700 |                             |             |             |             |
| H                           | -2.58053500 | -4.38401700 | -1.68499200 |                             |             |             |             |
| H                           | -4.06734400 | -3.88141100 | -0.84154600 |                             |             |             |             |
| H                           | -3.08330100 | -1.66519600 | -0.34192700 |                             |             |             |             |
| H                           | -2.59478300 | -3.73292600 | 1.11312400  |                             |             |             |             |
| H                           | -0.98258400 | -3.75210500 | 0.37125800  |                             |             |             |             |
| H                           | 1.16382400  | -2.42242800 | -2.43337300 |                             |             |             |             |
| H                           | -2.14083500 | -1.66177500 | 2.07123900  |                             |             |             |             |
| <b>APol-bridge-2trans-a</b> |             |             |             | <b>APol-bridge-2trans-b</b> |             |             |             |
| Mo                          | 0.00957700  | 0.00741500  | -0.94072700 | Mo                          | 0.01227300  | -0.12904100 | 1.05164000  |
| O                           | 2.14695300  | -0.22922200 | -0.95604800 | O                           | 2.15795500  | -0.40677300 | 1.05757800  |
| O                           | -2.12848300 | 0.23987200  | -0.98817200 | O                           | -2.13190500 | -0.21825000 | 1.05969500  |
| C                           | 2.76644600  | -0.30505100 | 0.16105400  | C                           | 2.80172200  | -0.20376400 | -0.03928100 |
| C                           | 4.28471000  | -0.51939100 | 0.14721800  | C                           | 4.32159100  | -0.40998000 | -0.03914000 |
| Mo                          | -0.00655300 | 0.0113940   | 0.19173300  | Mo                          | 0.04443900  | 0.25470100  | -0.05340600 |
| C                           | -2.76623800 | 0.31312100  | 0.11655900  | C                           | -2.75573400 | 0.09257700  | -0.01653700 |
| O                           | 2.13687100  | -0.19781100 | 1.27014800  | O                           | 2.20256200  | 0.18489700  | -1.09161900 |
| O                           | -2.15415800 | 0.21873600  | 1.23836900  | O                           | -2.12437000 | 0.36352500  | -1.09225500 |
| C                           | -4.29042400 | 0.48459200  | 0.12016400  | C                           | -4.28993600 | 0.12888300  | -0.03132600 |
| C                           | -4.64708000 | 1.74490100  | 0.94108600  | C                           | -4.79489800 | -0.93948600 | -1.02940400 |
| H                           | -4.21854400 | 2.64748800  | 0.48810200  | H                           | -4.49567500 | -1.94749500 | -0.71754700 |
| H                           | -5.73631300 | 1.86999600  | 0.97333300  | H                           | -5.89058000 | -0.91374900 | -1.07803500 |
| H                           | -4.27959800 | 1.66531400  | 1.96914000  | H                           | -4.39939900 | -0.75929700 | -2.03387300 |
| C                           | -4.83053900 | 0.62599500  | -1.31289000 | C                           | -4.86446100 | -0.15252500 | 1.36732700  |
| H                           | -4.60423900 | -0.25928000 | -1.91572000 | H                           | -4.52735400 | 0.59168100  | 2.09691500  |
| H                           | -5.91980500 | 0.75173200  | -1.28299700 | H                           | -5.96025200 | -0.12008400 | 1.32725600  |
| H                           | -4.39845700 | 1.49507800  | -1.81981100 | H                           | -4.56480000 | -1.13995300 | 1.73313200  |
| C                           | -4.91436200 | -0.76019600 | 0.79470000  | C                           | -4.74138900 | 1.52829700  | -0.50925500 |
| H                           | -4.55373200 | -0.87623400 | 1.82181900  | H                           | -4.35584000 | 1.74687600  | -1.50995200 |
| H                           | -6.00613800 | -0.65852800 | 0.82101200  | H                           | -5.83683000 | 1.57341500  | -0.54376300 |
| H                           | -4.67479400 | -1.67488800 | 0.23892100  | H                           | -4.39405200 | 2.31244000  | 0.17510600  |
| C                           | 4.57387500  | -1.88048900 | -0.52906200 | C                           | 4.95001700  | 0.67266400  | 0.87184600  |
| H                           | 4.16986100  | -1.90984400 | -1.54554500 | H                           | 4.56135000  | 0.60432400  | 1.89292200  |
| H                           | 5.65704000  | -2.04605100 | -0.58022700 | H                           | 6.03872800  | 0.54227000  | 0.90608500  |
| H                           | 4.13241800  | -2.70829000 | 0.03974100  | H                           | 4.74248500  | 1.67988700  | 0.49066400  |
| C                           | 4.85705900  | -0.51443600 | 1.57477300  | C                           | 4.89304300  | -0.28625800 | -1.46177700 |
| H                           | 5.94189900  | -0.67098600 | 1.53525900  | H                           | 5.98019000  | -0.42971300 | -1.43474200 |
| H                           | 4.66882100  | 0.43919100  | 2.07974300  | H                           | 4.46628700  | -1.04047700 | -2.13209900 |
| H                           | 4.42034100  | -1.31065500 | 2.18698000  | H                           | 4.68793000  | 0.69888900  | -1.89245700 |
| C                           | 4.93542100  | 0.61250100  | -0.68104300 | C                           | 4.64186400  | -1.80885800 | 0.53358500  |
| H                           | 6.02142100  | 0.46401900  | -0.72019500 | H                           | 5.72779800  | -1.96157300 | 0.55399900  |
| H                           | 4.55014200  | 0.62472600  | -1.70485900 | H                           | 4.26039800  | -1.91665500 | 1.55357200  |
| H                           | 4.74560500  | 1.59452800  | -0.23074100 | H                           | 4.20389700  | -2.60148500 | -0.08618300 |
| C                           | 1.47934300  | 4.03422400  | -1.62549800 | C                           | 0.72378300  | 4.77095500  | -0.42589800 |
| C                           | 1.14665400  | 2.82254300  | -0.74744700 | C                           | 0.63661900  | 3.30461500  | -0.01439500 |
| C                           | 0.67885600  | 3.30405600  | 0.64709400  | C                           | -0.00959200 | 3.11099700  | 1.35720700  |
| O                           | 0.19441000  | 2.00479600  | -1.38027900 | O                           | -0.08438500 | 2.55699100  | -1.04607100 |
| N                           | -0.15850900 | 2.29663800  | 1.37068700  | N                           | 0.01487200  | 1.74259100  | 1.84531000  |
| H                           | 1.89935600  | 3.70137300  | -2.58090800 | H                           | 1.13945400  | 4.85922300  | -1.43484600 |
| H                           | 0.57160800  | 4.61527100  | -1.83245200 | H                           | -0.26506200 | 5.24801500  | -0.41484900 |
| H                           | 2.21076900  | 4.69425700  | -1.13885500 | H                           | 1.37229300  | 5.32324200  | 0.26358700  |
| H                           | 2.07686900  | 2.25012000  | -0.60014800 | H                           | 1.62948600  | 2.84808600  | -0.02268300 |
| H                           | 1.55271000  | 3.52473500  | 1.26992100  | H                           | 0.52696600  | 3.77710200  | 2.05351800  |
| H                           | 0.09581200  | 4.23006500  | 0.54792300  | H                           | -1.04146000 | 3.51470900  | 1.29508500  |
| H                           | -1.12028600 | 2.42187800  | 1.05144400  | H                           | -1.01794400 | 2.83241800  | -1.04563500 |
| H                           | -0.17854600 | 2.55302900  | 2.35933100  | H                           | -0.29216000 | 1.73079600  | 2.81966000  |
| C                           | -1.45470700 | -4.02387600 | -1.63082800 | C                           | -1.17408200 | -4.37851700 | 0.66771200  |
| C                           | -1.13785400 | -2.80662000 | -0.75453300 | C                           | -0.17321900 | -3.44802700 | -0.00515500 |
| C                           | -0.69575600 | -3.27935200 | 0.65205600  | C                           | -0.74096100 | -2.75796600 | -1.26380700 |

|                      |             |             |             |                      |             |             |             |
|----------------------|-------------|-------------|-------------|----------------------|-------------|-------------|-------------|
| O                    | -0.17431600 | -1.99303300 | -1.37462700 | O                    | 0.26104700  | -2.45918000 | 0.99775300  |
| N                    | 0.14079200  | -2.27294700 | 1.37784800  | N                    | 0.06046400  | -1.67856500 | -1.80561900 |
| H                    | -1.85588200 | -3.69705100 | -2.59639000 | H                    | -0.71980000 | -4.90517800 | 1.51396100  |
| H                    | -0.54369300 | -4.60698100 | -1.81643000 | H                    | -2.03554800 | -3.80967000 | 1.03669500  |
| H                    | -2.19584900 | -4.68013800 | -1.15384200 | H                    | -1.53818000 | -5.12503500 | -0.04858700 |
| H                    | -2.07122700 | -2.23394700 | -0.62772500 | H                    | 0.72745700  | -4.00595000 | -0.28921500 |
| H                    | -1.58042500 | -3.48545800 | 1.26436000  | H                    | -0.89812900 | -3.56803900 | -2.00066000 |
| H                    | -0.12009800 | -4.21171200 | 0.57039300  | H                    | -1.73659000 | -2.36424600 | -1.02322900 |
| H                    | 1.10388900  | -2.40374500 | 1.06455200  | H                    | 1.23107600  | -2.47868500 | 1.05016300  |
| H                    | 0.15346300  | -2.52667700 | 2.36733600  | H                    | 0.97116600  | -2.03331900 | -2.10847700 |
| <b>APol-bridge-3</b> |             |             |             | <b>APol-bridge-4</b> |             |             |             |
| Mo                   | 0.29300900  | 0.01613100  | 1.25714900  | Mo                   | -0.00501200 | -0.00261500 | -0.85029900 |
| O                    | -1.87931200 | 0.04088600  | 1.16642600  | Mo                   | -0.00916600 | 0.00085100  | 1.31782800  |
| C                    | -2.41688700 | 0.01363600  | 0.00382200  | C                    | 1.61906700  | -4.07360300 | -1.45010300 |
| C                    | -3.95318000 | 0.01577400  | -0.08534300 | C                    | 0.87585000  | -3.01915300 | -0.61285300 |
| Mo                   | 0.51981300  | 0.00289800  | -0.88410500 | C                    | 1.53484700  | -2.90545000 | 0.77361200  |
| O                    | -1.71517600 | -0.01237200 | -1.05406700 | O                    | 0.84646700  | -1.81402500 | -1.29964900 |
| C                    | -4.49595300 | -1.20877400 | 0.68625600  | N                    | 0.68030900  | -2.16535600 | 1.75178100  |
| H                    | -4.18968000 | -1.18121700 | 1.73701800  | H                    | 1.16658800  | -4.12915900 | -2.44595200 |
| H                    | -5.59249600 | -1.22035500 | 0.64667700  | H                    | 2.67297900  | -3.79171000 | -1.57438800 |
| H                    | -4.13441700 | -2.14618300 | 0.24537900  | H                    | 1.57421600  | -5.07015300 | -0.99008000 |
| C                    | -4.42091200 | -0.04580200 | -1.54926200 | H                    | -0.15941900 | -3.39062700 | -0.44796000 |
| H                    | -5.51775900 | -0.04006900 | -1.58583300 | H                    | 1.74906400  | -3.90851100 | 1.16889600  |
| H                    | -4.05367900 | 0.81098100  | -2.12342800 | H                    | 2.48124800  | -2.36360400 | 0.67227300  |
| H                    | -4.06626800 | -0.95510700 | -2.04580800 | H                    | -0.14644400 | -2.74308200 | 1.91947100  |
| C                    | -4.48052300 | 1.31082000  | 0.57441600  | C                    | -4.09262500 | -1.58750600 | -1.45364500 |
| H                    | -5.57713100 | 1.32876900  | 0.53879700  | C                    | -3.02808100 | -0.86223900 | -0.61346800 |
| H                    | -4.16861700 | 1.37596300  | 1.62191700  | C                    | -2.92079200 | -1.53157300 | 0.76844000  |
| H                    | -4.11308900 | 2.20095300  | 0.04894600  | O                    | -1.82279900 | -0.84340700 | -1.30032100 |
| C                    | 0.17204400  | 4.32678700  | -1.62658900 | N                    | -2.17472800 | -0.68958800 | 1.75235800  |
| C                    | 0.55047400  | 3.14552500  | -0.72005700 | H                    | -4.14473100 | -1.12827500 | -2.44651500 |
| C                    | -0.28646600 | 3.19203600  | 0.56848300  | H                    | -3.82383400 | -2.64397400 | -1.58475600 |
| O                    | 0.40628000  | 1.95270800  | -1.42747300 | H                    | -5.08781200 | -1.53353500 | -0.99161700 |
| N                    | 0.23966600  | 2.28294800  | 1.63082300  | H                    | -3.38854100 | 0.17595400  | -0.44117600 |
| H                    | 0.74996000  | 4.27231900  | -2.55518100 | H                    | -3.92564500 | -1.74111300 | 1.16171700  |
| H                    | -0.89297600 | 4.28408500  | -1.88850900 | H                    | -2.38609900 | -2.48129400 | 0.66063000  |
| H                    | 0.37640300  | 5.29257800  | -1.14572300 | H                    | -2.74856500 | 0.13749700  | 1.93109100  |
| H                    | 1.61298600  | 3.27695800  | -0.42300400 | C                    | -1.53613600 | 4.09968800  | -1.46365100 |
| H                    | -0.30970500 | 4.22077400  | 0.95416700  | C                    | -0.83859000 | 3.01979300  | -0.61936900 |
| H                    | -1.31100100 | 2.88167300  | 0.34556400  | C                    | -1.51983100 | 2.92260500  | 0.75814400  |
| H                    | -0.35908000 | 2.39644800  | 2.45176300  | O                    | -0.84026700 | 1.81489000  | -1.30673500 |
| H                    | 1.15089600  | 2.64305000  | 1.92282800  | N                    | -0.69427800 | 2.16817700  | 1.75004400  |
| C                    | 4.89619300  | -0.22842100 | -1.02160800 | H                    | -1.06753900 | 4.14509500  | -2.45251900 |
| C                    | 3.55195200  | -0.39649100 | -0.29757200 | H                    | -2.59651600 | 3.85171100  | -1.60433300 |
| C                    | 3.56322100  | 0.40577000  | 1.01681500  | H                    | -1.46695800 | 5.09277400  | -0.99918700 |
| O                    | 2.51841000  | -0.02394400 | -1.15722000 | H                    | 0.20668300  | 3.35645200  | -0.44166800 |
| N                    | 2.49223600  | -0.02787000 | 1.96475000  | H                    | -1.72153800 | 3.92978700  | 1.14953600  |
| H                    | 4.86767300  | -0.77212800 | -1.97156700 | H                    | -2.47434300 | 2.39787800  | 0.64312800  |
| H                    | 5.08369900  | 0.83013900  | -1.24348700 | H                    | 0.13569600  | 2.73529500  | 1.93678800  |
| H                    | 5.73207900  | -0.61457500 | -0.42353000 | H                    | -1.20079000 | 2.16842900  | 2.63878700  |
| H                    | 3.44543300  | -1.46732200 | -0.02298200 | C                    | 4.09670000  | 1.54998200  | -1.43536700 |
| H                    | 4.54078300  | 0.30128200  | 1.50711900  | C                    | 3.01254300  | 0.84946600  | -0.59906700 |
| H                    | 3.40195200  | 1.46372500  | 0.78543000  | C                    | 2.90724000  | 1.52752700  | 0.77911800  |
| H                    | 2.72752700  | -0.97200600 | 2.27776100  | O                    | 1.81058600  | 0.85211800  | -1.29300700 |
| H                    | 2.57279100  | 0.54447000  | 2.80833100  | N                    | 2.15221100  | 0.69724300  | 1.76658500  |
| C                    | -0.06056300 | -4.31397500 | -1.56119200 | H                    | 4.14737200  | 1.08442800  | -2.42541500 |
| C                    | -0.19939100 | -3.04335600 | -0.70852500 | H                    | 3.84927900  | 2.61071900  | -1.57420700 |
| C                    | 0.42774200  | -3.27634500 | 0.67714600  | H                    | 5.08738200  | 1.47979200  | -0.96582700 |
| O                    | 0.37211000  | -1.96447600 | -1.38465800 | H                    | 3.35104100  | -0.19524400 | -0.42098800 |
| N                    | 0.03594300  | -2.23051300 | 1.66823500  | H                    | 3.91174400  | 1.73288200  | 1.17543400  |

|                    |             |             |             |                     |             |             |             |
|--------------------|-------------|-------------|-------------|---------------------|-------------|-------------|-------------|
| H                  | -0.47893600 | -4.13199700 | -2.55679700 | H                   | 2.37929800  | 2.48008800  | 0.66296500  |
| H                  | 0.99685300  | -4.58198200 | -1.68312000 | H                   | 2.72458700  | -0.12717900 | 1.96086000  |
| H                  | -0.58826400 | -5.16606600 | -1.11264100 | H                   | 2.14068100  | 1.20672000  | 2.65395400  |
| H                  | -1.28179900 | -2.85893300 | -0.55131000 | H                   | -2.17071500 | -1.18774600 | 2.64609200  |
| H                  | 0.12897100  | -4.26272500 | 1.05846400  | H                   | 1.16944300  | -2.16336100 | 2.65031600  |
| H                  | 1.51842200  | -3.25825800 | 0.58119200  |                     |             |             |             |
| H                  | -0.96761400 | -2.32591100 | 1.84276400  |                     |             |             |             |
| H                  | 0.47763500  | -2.46602400 | 2.55953000  |                     |             |             |             |
| <b>APol-chel-1</b> |             |             |             | <b>APol-chel-1b</b> |             |             |             |
| Mo                 | 0.21919400  | 0.14173500  | -0.84768900 | Mo                  | -0.03996800 | -0.91508500 | 0.57236800  |
| O                  | -1.28449300 | -1.16241700 | -1.53311000 | O                   | -1.81418500 | -2.08559300 | -0.08614900 |
| O                  | -1.16172700 | 1.73286000  | -0.85387100 | O                   | 1.61431400  | -1.84011200 | -0.36540500 |
| C                  | -1.80149700 | 2.02541300  | 0.21540500  | C                   | 2.18199300  | -1.26192700 | -1.34697100 |
| C                  | -2.69710000 | 3.26513300  | 0.23513000  | C                   | 3.29796700  | -1.94383700 | -2.13597900 |
| Mo                 | -0.26390900 | -0.30789100 | 1.19922400  | Mo                  | 0.15727100  | 0.78160900  | -0.73175700 |
| O                  | -1.65141800 | 1.30255300  | 1.26127900  | O                   | 1.78282600  | -0.09237800 | -1.71575200 |
| O                  | -1.80177800 | -1.62185200 | 0.57182800  | O                   | -1.98612500 | -0.75069000 | 1.63934800  |
| C                  | -2.00360600 | -1.79083700 | -0.67839600 | C                   | -2.51697700 | -1.64048300 | 0.88841500  |
| C                  | -3.08176100 | -2.75252100 | -1.17954000 | C                   | -3.92187100 | -2.18259300 | 1.14086600  |
| O                  | 2.18632800  | -0.82061900 | -1.38168400 | O                   | 1.32203000  | -0.04516500 | 1.93265000  |
| O                  | 2.10693300  | 1.29334200  | -0.80915300 | O                   | 1.47562600  | 1.72755400  | 0.61201400  |
| C                  | 2.78835200  | 0.29355200  | -1.24971200 | C                   | 1.78085600  | 1.12201500  | 1.70721200  |
| C                  | 4.25420100  | 0.47414100  | -1.64142600 | C                   | 2.64087700  | 1.84553500  | 2.74223400  |
| C                  | -3.50000400 | 3.33821500  | 1.54521700  | C                   | -4.75080900 | -2.02361100 | -0.15415900 |
| H                  | -4.13631100 | 4.23122100  | 1.53406100  | H                   | -4.86436100 | -0.96711400 | -0.42673900 |
| H                  | -4.14514600 | 2.46163500  | 1.66961000  | H                   | -4.28195700 | -2.54818000 | -0.99212200 |
| H                  | -2.84206000 | 3.39877400  | 2.41813800  | H                   | -5.75344300 | -2.44019000 | -0.00113300 |
| C                  | -1.78566300 | 4.51055800  | 0.10792200  | C                   | -4.59848200 | -1.43193000 | 2.29976600  |
| H                  | -1.20811800 | 4.48437600  | -0.82165800 | H                   | -5.60388000 | -1.83893900 | 2.46100600  |
| H                  | -2.40022400 | 5.41890700  | 0.10740900  | H                   | -4.03310200 | -1.53772300 | 3.23126200  |
| H                  | -1.08459700 | 4.57798800  | 0.94878600  | H                   | -4.69376400 | -0.36235200 | 2.08407500  |
| C                  | -3.66099500 | 3.20732800  | -0.97120300 | C                   | -3.78972900 | -3.68561700 | 1.48780600  |
| H                  | -4.31795200 | 2.33129300  | -0.91203500 | H                   | -3.19500600 | -3.83316700 | 2.39730700  |
| H                  | -4.29228700 | 4.10396900  | -0.98143300 | H                   | -4.78585200 | -4.10896700 | 1.66329300  |
| H                  | -3.11147200 | 3.16017900  | -1.91613500 | H                   | -3.31705900 | -4.24040200 | 0.67129200  |
| C                  | -4.04649200 | -1.97400300 | -2.10378100 | C                   | 4.52139200  | -1.00018800 | -2.18760000 |
| H                  | -4.55203400 | -1.16666900 | -1.56014300 | H                   | 5.32131200  | -1.46841800 | -2.77342500 |
| H                  | -3.51377900 | -1.53513900 | -2.95297400 | H                   | 4.26596600  | -0.04383100 | -2.65405300 |
| H                  | -4.81491500 | -2.65398600 | -2.49098600 | H                   | 4.91087300  | -0.79992200 | -1.18224600 |
| C                  | -2.38646800 | -3.87524300 | -1.98630500 | C                   | 3.68962100  | -3.27794800 | -1.47839300 |
| H                  | -3.14024100 | -4.57467600 | -2.36777700 | H                   | 2.84326900  | -3.97123400 | -1.44141200 |
| H                  | -1.83288000 | -3.46593900 | -2.83719000 | H                   | 4.49282100  | -3.74758000 | -2.05839400 |
| H                  | -1.68608400 | -4.43916400 | -1.35895400 | H                   | 4.04981000  | -3.12981900 | -0.45462400 |
| C                  | -3.86144300 | -3.36053100 | -0.00143600 | C                   | 2.77860400  | -2.19650500 | -3.57271300 |
| H                  | -3.20253900 | -3.92153100 | 0.66906100  | H                   | 1.90156800  | -2.85463900 | -3.56855900 |
| H                  | -4.36335800 | -2.58666800 | 0.58932400  | H                   | 2.50435400  | -1.25831400 | -4.06552300 |
| H                  | -4.62584300 | -4.04679500 | -0.38538100 | H                   | 3.56319200  | -2.68124900 | -4.16586800 |
| C                  | 4.28176300  | 1.33130600  | -2.93180600 | C                   | 3.91277800  | 2.38661600  | 2.05164100  |
| H                  | 3.82234800  | 2.31136700  | -2.76688600 | H                   | 3.66135600  | 3.07010900  | 1.23513000  |
| H                  | 5.32095900  | 1.48563400  | -3.24617500 | H                   | 4.52441500  | 2.92970100  | 2.78189000  |
| H                  | 3.75112600  | 0.83263000  | -3.75157100 | H                   | 4.51973600  | 1.57006000  | 1.64237300  |
| C                  | 4.99636100  | 1.22111500  | -0.51234300 | C                   | 3.02794700  | 0.89373600  | 3.88702800  |
| H                  | 6.03961200  | 1.38752900  | -0.80602100 | H                   | 3.64636700  | 1.43195000  | 4.61507200  |
| H                  | 4.53606500  | 2.19259900  | -0.30860500 | H                   | 2.14459400  | 0.50846600  | 4.40596400  |
| H                  | 4.99928000  | 0.63757500  | 0.41634100  | H                   | 3.60319300  | 0.03741600  | 3.51820500  |
| C                  | 4.91833800  | -0.88806300 | -1.90368300 | C                   | 1.81039600  | 3.02843900  | 3.29911500  |
| H                  | 4.89700200  | -1.52254400 | -1.01095900 | H                   | 2.40257000  | 3.57370800  | 4.04376600  |
| H                  | 4.41711800  | -1.42956400 | -2.71183100 | H                   | 1.53172400  | 3.72650700  | 2.50313000  |
| H                  | 5.96600100  | -0.73521600 | -2.18967600 | H                   | 0.89413900  | 2.67584500  | 3.78748700  |
| C                  | 2.71248900  | -2.55579500 | 3.37665500  | C                   | -3.29976900 | 4.32772800  | -2.90721900 |



|                      |             |             |             |                      |             |             |             |
|----------------------|-------------|-------------|-------------|----------------------|-------------|-------------|-------------|
| C                    | 1.69207900  | -1.45854600 | 3.07174100  | C                    | -3.04073500 | 3.18355000  | -1.93732300 |
| C                    | 2.36427900  | -0.10251400 | 2.82489500  | C                    | -1.99003200 | 2.18751700  | -2.46242200 |
| O                    | 0.92991700  | -1.78825900 | 1.93041200  | O                    | -2.60791700 | 3.74604000  | -0.69261200 |
| N                    | 1.31472100  | 0.85418800  | 2.35597500  | N                    | -1.66192100 | 1.16156900  | -1.47122700 |
| H                    | 2.19635000  | -3.50762300 | 3.54215100  | H                    | -4.04633600 | 5.01649100  | -2.49708600 |
| H                    | 3.39943100  | -2.68331100 | 2.53118600  | H                    | -2.37793800 | 4.89138700  | -3.09473200 |
| H                    | 3.29775300  | -2.32069400 | 4.27537100  | H                    | -3.67565700 | 3.94442700  | -3.86314400 |
| H                    | 1.03068000  | -1.35132600 | 3.95552800  | H                    | -3.98049600 | 2.63007200  | -1.76825600 |
| H                    | 2.87587200  | 0.28287500  | 3.71567800  | H                    | -2.36780300 | 1.72982100  | -3.39016500 |
| H                    | 3.09553800  | -0.20602400 | 2.01811100  | H                    | -1.07597800 | 2.74115400  | -2.71701100 |
| H                    | 0.88095500  | 1.32053900  | 3.15455400  | H                    | -2.24966800 | 3.00246200  | -0.17180600 |
| H                    | 1.73165000  | 1.58991300  | 1.78518400  | H                    | -2.46896600 | 0.56720500  | -1.28259000 |
| <b>APol-chel-1sN</b> |             |             |             | <b>APol-chel-1sO</b> |             |             |             |
| Mo                   | -0.26261400 | -0.26105400 | -1.03679700 | Mo                   | -0.08346800 | -0.10000900 | -1.07846500 |
| O                    | -1.40737300 | -2.06188600 | -0.85037100 | O                    | -0.76377700 | -2.11563400 | -1.15987700 |
| O                    | -2.03583100 | 0.82136900  | -1.43602500 | O                    | -2.02359300 | 0.59059900  | -1.53933800 |
| C                    | -2.68581600 | 1.35374300  | -0.47215500 | C                    | -2.84742200 | 0.84279700  | -0.59381800 |
| C                    | -3.98565600 | 2.10394200  | -0.78074500 | C                    | -4.25290700 | 1.33793000  | -0.94181300 |
| Mo                   | -0.43900700 | 0.12343600  | 1.06275500  | Mo                   | -0.50851100 | 0.00549700  | 1.01804400  |
| O                    | -2.26893800 | 1.23579900  | 0.73054600  | O                    | -2.49039900 | 0.67979000  | 0.62420500  |
| O                    | -1.65490000 | -1.60683500 | 1.31466400  | O                    | -1.22238600 | -1.99410400 | 1.01515000  |
| C                    | -1.89202300 | -2.34598500 | 0.29554600  | C                    | -1.20547400 | -2.64977400 | -0.08540300 |
| C                    | -2.76225400 | -3.59894500 | 0.44289400  | C                    | -1.72330200 | -4.08992900 | -0.13494000 |
| O                    | 0.92993400  | 1.55833900  | -1.32516700 | O                    | 0.69142100  | 1.94149000  | -1.07535000 |
| O                    | 0.58607600  | 2.04081300  | 0.82173600  | O                    | 0.07898800  | 2.09712000  | 1.05930700  |
| C                    | 1.03595600  | 2.36415400  | -0.32174500 | C                    | 0.54858000  | 2.63237900  | 0.01008800  |
| C                    | 1.67366700  | 3.73855500  | -0.54754800 | C                    | 0.91397600  | 4.11914000  | -0.01049300 |
| O                    | 1.59146600  | -1.50047800 | -1.28021200 | O                    | 1.99448800  | -0.88773200 | -1.24689800 |
| O                    | 3.07499800  | 0.02369700  | -2.01327900 | O                    | 3.20873400  | 0.97505300  | -1.57796700 |
| C                    | 2.72017600  | -1.21477600 | -1.71157000 | C                    | 3.08440400  | -0.33840400 | -1.46644300 |
| C                    | 3.80994100  | -2.25786100 | -1.92916200 | C                    | 4.38305700  | -1.11618300 | -1.63860400 |
| H                    | 2.33741100  | 0.66379200  | -1.80775300 | H                    | 2.33094800  | 1.42265500  | -1.43234500 |
| C                    | -4.46128500 | 2.89876700  | 0.44761500  | C                    | -5.06935000 | 1.60376100  | 0.33434800  |
| H                    | -5.39461900 | 3.42178500  | 0.20610300  | H                    | -6.07030900 | 1.95791300  | 0.06013000  |
| H                    | -4.64649400 | 2.24275700  | 1.30375800  | H                    | -5.18092300 | 0.69585300  | 0.93621500  |
| H                    | -3.72061500 | 3.64699800  | 0.75122100  | H                    | -4.59666800 | 2.36705900  | 0.96142000  |
| C                    | -3.75469000 | 3.06108000  | -1.97015900 | C                    | -4.12457400 | 2.64108300  | -1.76488500 |
| H                    | -3.42596500 | 2.51642500  | -2.86021100 | H                    | -3.55164500 | 2.47538200  | -2.68252500 |
| H                    | -4.68810700 | 3.58494300  | -2.20940400 | H                    | -5.12265900 | 3.00236800  | -2.04062400 |
| H                    | -2.99561200 | 3.81552000  | -1.73073200 | H                    | -3.62794600 | 3.42909500  | -1.18615400 |
| C                    | -5.05382500 | 1.05119300  | -1.16717800 | C                    | -4.95162500 | 0.25540000  | -1.79803800 |
| H                    | -5.23812200 | 0.35191900  | -0.34296100 | H                    | -5.05143800 | -0.68570600 | -1.24406000 |
| H                    | -5.99978600 | 1.55417000  | -1.40282500 | H                    | -5.95767300 | 0.59515500  | -2.07238900 |
| H                    | -4.74184300 | 0.47562300  | -2.04491400 | H                    | -4.39178400 | 0.05573500  | -2.71707900 |
| C                    | 0.70118500  | 4.56116400  | -1.42972400 | C                    | -0.17189500 | 4.84838400  | -0.84160400 |
| H                    | -0.26494800 | 4.70121400  | -0.93103300 | H                    | -1.16289300 | 4.73462800  | -0.38694000 |
| H                    | 1.13061000  | 5.55208700  | -1.62015700 | H                    | 0.05962600  | 5.91938000  | -0.88518700 |
| H                    | 0.52608000  | 4.06989800  | -2.39223300 | H                    | -0.21400000 | 4.46293200  | -1.86552900 |
| C                    | 1.90047500  | 4.46253300  | 0.79071200  | C                    | 0.94665200  | 4.68959700  | 1.41795700  |
| H                    | 2.58324900  | 3.90461300  | 1.44043600  | H                    | 1.70037300  | 4.18638100  | 2.03332100  |
| H                    | 2.34117400  | 5.44839200  | 0.60057200  | H                    | 1.19638500  | 5.75645700  | 1.37884600  |
| H                    | 0.96158700  | 4.60537000  | 1.33410700  | H                    | -0.02149000 | 4.58208900  | 1.91619000  |
| C                    | 3.01882700  | 3.57127300  | -1.28837200 | C                    | 2.29002800  | 4.31147300  | -0.68423700 |
| H                    | 3.72455800  | 2.96609600  | -0.70671100 | H                    | 3.08100800  | 3.78387400  | -0.13796600 |
| H                    | 2.88401200  | 3.10318800  | -2.26852500 | H                    | 2.28527900  | 3.95669700  | -1.71961700 |
| H                    | 3.47303800  | 4.55659500  | -1.44504300 | H                    | 2.54453200  | 5.37763400  | -0.69442300 |
| C                    | -3.94843600 | -3.49487000 | -0.54308300 | C                    | -2.90846300 | -4.14446500 | -1.12779800 |
| H                    | -4.57800200 | -2.62616900 | -0.31576200 | H                    | -3.73483700 | -3.50482900 | -0.79496700 |
| H                    | -3.59802300 | -3.40353800 | -1.57576400 | H                    | -2.60282100 | -3.81907600 | -2.12704100 |
| H                    | -4.57223300 | -4.39384200 | -0.46685900 | H                    | -3.28375900 | -5.17264500 | -1.19768300 |

|                    |             |             |             |   |             |             |             |
|--------------------|-------------|-------------|-------------|---|-------------|-------------|-------------|
| C                  | -1.89743600 | -4.82960600 | 0.08128600  | C | -0.58218700 | -5.00160200 | -0.64318200 |
| H                  | -2.50052100 | -5.74194100 | 0.16553100  | H | -0.93699500 | -6.03779200 | -0.70042000 |
| H                  | -1.51861900 | -4.75868000 | -0.94311100 | H | -0.24491700 | -4.69580600 | -1.63829000 |
| H                  | -1.04102000 | -4.92564400 | 0.75956400  | H | 0.27901600  | -4.97478400 | 0.03500400  |
| C                  | -3.28965500 | -3.73734800 | 1.88113800  | C | -2.18612600 | -4.55698100 | 1.25543300  |
| H                  | -2.47076400 | -3.82268800 | 2.60292300  | H | -1.36619300 | -4.53262800 | 1.98081600  |
| H                  | -3.90210400 | -2.87612200 | 2.16847600  | H | -2.99565500 | -3.92873700 | 1.64139800  |
| H                  | -3.90961200 | -4.63893700 | 1.95777700  | H | -2.55446700 | -5.58791700 | 1.18994300  |
| C                  | 4.27682900  | -2.18795600 | -3.40337400 | C | 4.95247700  | -0.81215100 | -3.04627000 |
| H                  | 4.68954600  | -1.20514800 | -3.64864500 | H | 5.16900200  | 0.25295000  | -3.17098100 |
| H                  | 5.05619900  | -2.94050900 | -3.56714100 | H | 5.88449800  | -1.37191300 | -3.18318100 |
| H                  | 3.45167900  | -2.40088800 | -4.09306900 | H | 4.25480000  | -1.12045300 | -3.83390600 |
| C                  | 4.99403500  | -1.91924100 | -0.98913700 | C | 5.38321700  | -0.64198300 | -0.55559800 |
| H                  | 5.78327900  | -2.66716700 | -1.12462800 | H | 6.31741400  | -1.20488700 | -0.66204600 |
| H                  | 5.41245800  | -0.93264600 | -1.20929900 | H | 5.60917000  | 0.42363400  | -0.65676300 |
| H                  | 4.68600800  | -1.94005600 | 0.06279400  | H | 4.99136500  | -0.82042800 | 0.45199300  |
| C                  | 3.26741800  | -3.66077600 | -1.61105300 | C | 4.11623200  | -2.62268100 | -1.48850600 |
| H                  | 2.93430700  | -3.73739800 | -0.57132500 | H | 3.70696400  | -2.85986600 | -0.50168800 |
| H                  | 2.42165700  | -3.92077000 | -2.25587100 | H | 3.40997900  | -2.98346400 | -2.24327000 |
| H                  | 4.06119300  | -4.39852500 | -1.77237800 | H | 5.05817800  | -3.16877100 | -1.61154200 |
| C                  | 2.85544900  | 0.14451700  | 5.28510200  | C | 2.01178100  | -2.18105600 | 3.48975000  |
| C                  | 2.63243700  | 0.13762800  | 3.77839900  | C | 1.12487700  | -0.93735600 | 3.35733500  |
| C                  | 1.45412300  | -0.75944600 | 3.35092400  | C | 1.56460500  | 0.16841200  | 4.33933000  |
| O                  | 2.39906600  | 1.48854900  | 3.36043200  | O | 1.17154600  | -0.45125000 | 2.02999600  |
| N                  | 1.20664400  | -0.70684000 | 1.91726700  | N | 0.75055200  | 1.38925900  | 4.33783300  |
| H                  | 3.68686100  | 0.80766100  | 5.54955900  | H | 1.68156400  | -2.95894700 | 2.79270600  |
| H                  | 1.95708100  | 0.49711400  | 5.80660400  | H | 3.05425200  | -1.93155900 | 3.25420900  |
| H                  | 3.09416000  | -0.86375600 | 5.64444600  | H | 1.97392400  | -2.59042300 | 4.50807100  |
| H                  | 3.54301900  | -0.23717500 | 3.27844500  | H | 0.08949500  | -1.22703000 | 3.62540300  |
| H                  | 1.65617900  | -1.78988300 | 3.69020600  | H | 1.57046000  | -0.23611600 | 5.36051900  |
| H                  | 0.55608300  | -0.41676000 | 3.88505300  | H | 2.59751000  | 0.45165200  | 4.09621600  |
| H                  | 1.98353600  | 1.45002000  | 2.47718600  | H | 0.70012700  | 1.76575000  | 3.39143400  |
| H                  | 1.92098200  | -1.21546100 | 1.40026000  | H | -0.20704500 | 1.17378300  | 4.61614300  |
| <b>APol-chel-2</b> |             |             |             |   |             |             |             |
| Mo                 | 0.53276500  | 0.33089900  | 0.72212500  |   |             |             |             |
| O                  | -0.52996000 | 2.05932700  | 0.09893100  |   |             |             |             |
| C                  | -1.19581600 | 2.00045900  | -0.99477000 |   |             |             |             |
| C                  | -1.91517400 | 3.25306800  | -1.49983400 |   |             |             |             |
| Mo                 | -0.13887100 | -0.76624500 | -0.01009700 |   |             |             |             |
| O                  | -1.21784000 | 0.91825200  | -1.67420800 |   |             |             |             |
| O                  | -1.19350200 | -0.22603400 | 1.82780900  |   |             |             |             |
| O                  | -1.94262000 | -1.35255700 | 0.06350700  |   |             |             |             |
| C                  | -2.07058500 | -0.98788600 | 1.27873200  |   |             |             |             |
| C                  | -3.23516800 | -1.49825000 | 2.13447000  |   |             |             |             |
| C                  | -2.85046800 | 3.77776500  | -0.38698200 |   |             |             |             |
| H                  | -2.29044800 | 4.01097000  | 0.52379600  |   |             |             |             |
| H                  | -3.35427300 | 4.69078300  | -0.72734600 |   |             |             |             |
| H                  | -3.62117100 | 3.03888400  | -0.13624600 |   |             |             |             |
| C                  | -2.73190700 | 2.94138700  | -2.76547200 |   |             |             |             |
| H                  | -3.23647900 | 3.85270000  | -3.10879100 |   |             |             |             |
| H                  | -2.09243300 | 2.57717200  | -3.57578000 |   |             |             |             |
| H                  | -3.49594300 | 2.18064000  | -2.57175100 |   |             |             |             |
| C                  | -0.84237700 | 4.32250000  | -1.81867600 |   |             |             |             |
| H                  | -0.15734700 | 3.97631000  | -2.60184200 |   |             |             |             |
| H                  | -1.32894800 | 5.23905800  | -2.17418700 |   |             |             |             |
| H                  | -0.25249200 | 4.56790300  | -0.92975200 |   |             |             |             |
| C                  | -3.92491300 | -0.29747500 | 2.81925200  |   |             |             |             |
| H                  | -4.74692700 | -0.65370800 | 3.45235300  |   |             |             |             |
| H                  | -3.22134200 | 0.25874200  | 3.44591700  |   |             |             |             |
| H                  | -4.34382300 | 0.39391500  | 2.07801500  |   |             |             |             |

|   |             |             |             |
|---|-------------|-------------|-------------|
| C | -2.65386600 | -2.44310600 | 3.21428100  |
| H | -3.46369300 | -2.82428500 | 3.84858600  |
| H | -2.14788400 | -3.30323300 | 2.75889500  |
| H | -1.93451500 | -1.91904100 | 3.85193600  |
| C | -4.25407600 | -2.26112500 | 1.27070900  |
| H | -3.79886700 | -3.13079300 | 0.78591100  |
| H | -5.07947200 | -2.61310500 | 1.90156700  |
| H | -4.67326400 | -1.62077600 | 0.48682800  |
| C | 5.49220700  | 1.65959500  | 2.66255900  |
| C | 4.53673400  | 1.28523300  | 1.52608700  |
| C | 3.36226700  | 0.42584100  | 2.03572200  |
| O | 4.09244200  | 2.45541500  | 0.82259700  |
| N | 2.46773900  | -0.07321500 | 0.99956000  |
| H | 6.31557500  | 2.27271000  | 2.28107800  |
| H | 4.96938000  | 2.23379000  | 3.43968000  |
| H | 5.91681900  | 0.76435500  | 3.13314400  |
| H | 5.08321800  | 0.71374400  | 0.76537100  |
| H | 3.79398100  | -0.40986700 | 2.61302200  |
| H | 2.77984100  | 1.02394000  | 2.75299600  |
| H | 3.51475500  | 2.97016800  | 1.41105900  |
| H | 2.97192200  | -0.66544200 | 0.33992600  |
| C | 1.97321100  | -4.55364300 | -2.26198900 |
| C | 1.87756300  | -3.11077800 | -1.79257000 |
| C | 1.81838100  | -2.05708900 | -2.90410800 |
| O | 0.67572000  | -2.92135300 | -0.95794900 |
| N | 1.42077500  | -0.76727600 | -2.35082500 |
| H | 1.98689800  | -5.24786500 | -1.41447800 |
| H | 1.13401200  | -4.81609000 | -2.91992200 |
| H | 2.89832600  | -4.69762200 | -2.83189600 |
| H | 2.69964100  | -2.87234100 | -1.11056100 |
| H | 2.80056200  | -2.00591100 | -3.39509200 |
| H | 1.10218100  | -2.41018400 | -3.66927900 |
| H | -0.01060700 | -3.55774100 | -1.22263200 |
| H | 2.12967700  | -0.05319100 | -2.47680800 |

**Table 4SI.** The Cartesian Coordinates of (1*S*,2*S*)-diaminocyclohexane (**11**, **DACH**) substituted dimolybdenum *tetrakis*( $\mu$ -pivalate) **Mo**<sub>2</sub> complexes.

| <b>DACH-bridge-1</b> |             |             |             | <b>DACH-bridge-2-trans</b> |             |             |             |
|----------------------|-------------|-------------|-------------|----------------------------|-------------|-------------|-------------|
| Mo                   | -0.06476600 | -0.11096400 | -1.02981000 | Mo                         | -0.07091700 | 0.05196600  | 1.06056600  |
| O                    | -1.22388300 | -1.92396800 | -1.04761000 | O                          | 0.12724700  | -2.09973600 | 1.09086700  |
| O                    | 0.86414400  | 1.83405600  | -1.08368700 | O                          | -0.13568800 | 2.20020400  | 1.13529500  |
| O                    | -1.95870100 | 0.94810900  | -1.14266100 | C                          | 0.18294900  | -2.71522200 | -0.02935400 |
| C                    | -1.55372100 | -2.44607100 | 0.07430300  | C                          | 0.27799500  | -4.24702400 | -0.01906400 |
| C                    | -2.40353600 | -3.72307700 | 0.06175000  | Mo                         | 0.03681400  | 0.08256000  | -0.06119300 |
| Mo                   | -0.11738000 | -0.05520000 | 1.09799700  | C                          | -0.17502900 | 2.84004600  | 0.02809200  |
| C                    | 1.14782400  | 2.40562500  | 0.02406400  | O                          | 0.15180400  | -2.07684900 | -1.13477400 |
| C                    | -2.52179400 | 1.28404100  | -0.04200100 | O                          | -0.16027800 | 2.22264900  | -1.09306900 |
| O                    | -1.18906000 | -1.92412900 | 1.18067100  | C                          | -0.21682000 | 4.37376600  | 0.02032400  |
| O                    | 0.91659500  | 1.83361700  | 1.14326800  | C                          | 1.09181900  | 4.88748300  | -0.62705700 |
| O                    | -1.98676700 | 1.00369600  | 1.08145500  | H                          | 1.20111600  | 4.50958000  | -1.64864200 |
| C                    | 1.76700400  | 3.80969400  | 0.02862800  | H                          | 1.08460400  | 5.98402900  | -0.66274500 |
| C                    | -3.85447600 | 2.04138400  | -0.09886400 | H                          | 1.96961600  | 4.57464700  | -0.04836600 |
| C                    | 0.74663000  | 4.78298000  | 0.66554100  | C                          | -0.34121200 | 4.93128400  | 1.44829300  |
| H                    | 0.49648000  | 4.47965400  | 1.68726100  | H                          | -0.36726300 | 6.02741800  | 1.41377300  |
| H                    | 1.16962400  | 5.79474300  | 0.69853900  | H                          | -1.25809600 | 4.58332800  | 1.93636500  |
| H                    | -0.18045500 | 4.82298000  | 0.08125400  | H                          | 0.50617600  | 4.62914600  | 2.07235400  |
| C                    | 2.10157600  | 4.26927800  | -1.40057600 | C                          | -1.42270800 | 4.83646600  | -0.82830300 |
| H                    | 2.54531300  | 5.27207200  | -1.36915900 | H                          | -2.36858900 | 4.48450000  | -0.39840600 |
| H                    | 2.81775400  | 3.59353500  | -1.88049200 | H                          | -1.45467500 | 5.93248700  | -0.86178000 |
| H                    | 1.20636300  | 4.31016600  | -2.02913600 | H                          | -1.35100800 | 4.46193400  | -1.85400500 |
| C                    | 3.05329900  | 3.78384000  | 0.88450400  | C                          | 1.53009700  | -4.65805600 | 0.78929000  |
| H                    | 3.79717300  | 3.09688000  | 0.46233200  | H                          | 2.44595800  | -4.27035600 | 0.32622900  |
| H                    | 3.49885300  | 4.78575100  | 0.91439300  | H                          | 1.47700900  | -4.28366800 | 1.81640600  |
| H                    | 2.83937000  | 3.47046000  | 1.91093900  | H                          | 1.60751900  | -5.75178100 | 0.82431600  |
| C                    | -3.61990000 | 3.37888200  | -0.83972300 | C                          | 0.37675500  | -4.80526500 | -1.44860000 |
| H                    | -4.56351400 | 3.93388900  | -0.91176300 | H                          | 0.44401200  | -5.89964900 | -1.41177600 |
| H                    | -2.89816800 | 4.00724900  | -0.30377300 | H                          | -0.50175500 | -4.53760400 | -2.04518800 |
| H                    | -3.24075100 | 3.20818100  | -1.85212900 | H                          | 1.26255200  | -4.42468200 | -1.96802200 |
| C                    | -4.87209200 | 1.18865200  | -0.89059500 | C                          | -0.98562400 | -4.80703500 | 0.67541100  |
| H                    | -5.05921700 | 0.22996600  | -0.39169000 | H                          | -1.89440300 | -4.53642100 | 0.12367400  |
| H                    | -5.82698600 | 1.72373100  | -0.96449200 | H                          | -0.93192800 | -5.90195400 | 0.72011900  |
| H                    | -4.51090600 | 0.98269200  | -1.90275400 | H                          | -1.07783800 | -4.42154700 | 1.69544600  |
| C                    | -4.39364000 | 2.31778400  | 1.31456000  | C                          | -3.21549400 | -0.55829000 | 0.67388000  |
| H                    | -3.69414000 | 2.92477200  | 1.89876400  | C                          | -4.52984300 | -0.45805600 | 1.48461100  |
| H                    | -5.34416200 | 2.86119400  | 1.24551800  | C                          | -5.79312200 | -0.88506300 | 0.72725900  |
| H                    | -4.57141500 | 1.38746300  | 1.86457700  | C                          | -5.93891800 | -0.07970500 | -0.56870700 |
| C                    | -3.72376300 | -3.42258500 | -0.68527900 | C                          | -4.68264400 | -0.24277100 | -1.43210100 |
| H                    | -4.29982200 | -2.64219000 | -0.17354800 | C                          | -3.38214800 | 0.15179900  | -0.70152700 |
| H                    | -3.53073100 | -3.08971900 | -1.70961500 | N                          | -2.10824100 | -0.06889400 | 1.48424400  |
| H                    | -4.34147200 | -4.32825900 | -0.72462700 | N                          | -2.21969100 | -0.12953400 | -1.60516300 |
| C                    | -2.71116600 | -4.19690200 | 1.49207700  | H                          | -3.03340100 | -1.62464900 | 0.45557000  |
| H                    | -3.31670500 | -5.11072500 | 1.45343300  | H                          | -4.40338900 | -1.04886900 | 2.40007000  |
| H                    | -1.79369100 | -4.41924300 | 2.04748400  | H                          | -4.65019200 | 0.58986400  | 1.80577000  |
| H                    | -3.26923000 | -3.44073700 | 2.05418300  | H                          | -6.67626900 | -0.75176200 | 1.36646500  |
| C                    | -1.62332800 | -4.82185000 | -0.69703100 | H                          | -5.73941800 | -1.95741700 | 0.48515100  |
| H                    | -0.67850500 | -5.05856600 | -0.19221400 | H                          | -6.82326800 | -0.40133100 | -1.13430500 |
| H                    | -2.22213100 | -5.73999600 | -0.73967800 | H                          | -6.08828300 | 0.98330400  | -0.32628200 |
| H                    | -1.39630200 | -4.50873800 | -1.72067900 | H                          | -4.77097200 | 0.34504500  | -2.35715700 |
| C                    | 2.79382100  | -1.65916100 | -0.73154100 | H                          | -4.60291400 | -1.29777400 | -1.74043700 |
| C                    | 4.09497400  | -1.52076300 | -1.55747800 | H                          | -3.37573500 | 1.23449300  | -0.52037100 |
| C                    | 5.32638300  | -2.11519800 | -0.86153200 | H                          | -2.41517600 | 0.78828700  | 1.95163100  |
| C                    | 5.51921400  | -1.48434300 | 0.52330200  | H                          | -2.29409200 | -1.10282900 | -1.91221600 |
| C                    | 4.24097300  | -1.62142100 | 1.36209200  | H                          | -2.35481200 | 0.41927600  | -2.45758500 |

|                            |             |             |             |                            |             |             |             |
|----------------------------|-------------|-------------|-------------|----------------------------|-------------|-------------|-------------|
| C                          | 3.00358300  | -1.03032800 | 0.66006000  | C                          | 3.21184500  | -0.21559500 | -0.68896700 |
| N                          | 1.66780000  | -1.08627200 | -1.45458700 | C                          | 4.51892400  | -0.01361600 | -1.49343300 |
| N                          | 1.79196500  | -1.20775700 | 1.52643500  | C                          | 5.80219500  | -0.41093900 | -0.75337600 |
| H                          | 2.63592000  | -2.74573100 | -0.56182800 | C                          | 5.91149400  | 0.34690100  | 0.57448100  |
| H                          | 3.93770500  | -2.00465400 | -2.53127600 | C                          | 4.66445100  | 0.09303400  | 1.42937800  |
| H                          | 4.25985800  | -0.45241800 | -1.75987200 | C                          | 3.34584800  | 0.45136000  | 0.71237400  |
| H                          | 6.21898400  | -1.96089100 | -1.48154900 | N                          | 2.07774800  | 0.24879500  | -1.47604200 |
| H                          | 5.20211100  | -3.20313400 | -0.75336900 | N                          | 2.19982400  | 0.09315200  | 1.61139200  |
| H                          | 6.36116500  | -1.95046100 | 1.05083900  | H                          | 3.08399700  | -1.29765300 | -0.51652700 |
| H                          | 5.76880100  | -0.41919900 | 0.40851900  | H                          | 4.42086200  | -0.56893600 | -2.43408300 |
| H                          | 4.37121400  | -1.12794800 | 2.33556600  | H                          | 4.58576000  | 1.05184000  | -1.76902900 |
| H                          | 4.05548400  | -2.68662300 | 1.57027200  | H                          | 6.67800400  | -0.21106300 | -1.38537400 |
| H                          | 3.13529200  | 0.05072400  | 0.53584400  | H                          | 5.79866300  | -1.49371300 | -0.55507900 |
| H                          | 1.74900500  | -1.32810900 | -2.44398200 | H                          | 6.80959600  | 0.04304400  | 1.12822300  |
| H                          | 1.55713800  | -2.20315600 | 1.55648900  | H                          | 6.01260300  | 1.42443400  | 0.37520700  |
| H                          | 2.06067100  | -0.97231900 | 2.48556800  | H                          | 4.72594300  | 0.64949700  | 2.37581400  |
|                            |             |             |             | H                          | 4.63452800  | -0.97536400 | 1.69794900  |
|                            |             |             |             | H                          | 3.29238900  | 1.53823800  | 0.56541600  |
|                            |             |             |             | H                          | 2.29670100  | 1.18881900  | -1.81692300 |
|                            |             |             |             | H                          | 2.34955700  | -0.86628400 | 1.93413700  |
|                            |             |             |             | H                          | 2.28163400  | 0.66421500  | 2.45555100  |
| <b>DACH-bridge-2-cis-a</b> |             |             |             | <b>DACH-bridge-2-cis-b</b> |             |             |             |
| Mo                         | -0.19286200 | -0.19362200 | -0.05344500 | Mo                         | -0.11957600 | -0.03591100 | -1.04003900 |
| O                          | -1.88399200 | -1.51610500 | -0.99688600 | O                          | -1.05746200 | 2.00761600  | -1.10406700 |
| O                          | -1.60186000 | 1.46507000  | -1.18563100 | O                          | 1.71961600  | 1.23174400  | -1.10920400 |
| C                          | -2.37591500 | -1.86411600 | 0.13568100  | C                          | -1.33900800 | 2.56074700  | 0.00858000  |
| C                          | -3.60460600 | -2.78593500 | 0.13803000  | C                          | -2.00507000 | 3.94839700  | -0.01050100 |
| Mo                         | -0.15807700 | -0.06851200 | 1.07858900  | Mo                         | -0.07927600 | 0.06976300  | 1.10298900  |
| C                          | -2.00413700 | 1.98794400  | -0.08272000 | C                          | 2.27813100  | 1.53607300  | -0.00353200 |
| O                          | -1.86943600 | -1.45370200 | 1.22900000  | O                          | -1.10216900 | 1.98887600  | 1.12560100  |
| O                          | -1.55288300 | 1.58314900  | 1.03539700  | O                          | 1.82455200  | 1.12123600  | 1.11462700  |
| C                          | -3.03174200 | 3.12671700  | -0.14038400 | C                          | 3.53380000  | 2.42511900  | -0.04036500 |
| C                          | -2.40659700 | 4.30812600  | -0.91884500 | C                          | 4.60550800  | 1.72684200  | -0.90837900 |
| H                          | -3.12669900 | 5.13310800  | -0.98758800 | H                          | 5.50603000  | 2.35156700  | -0.96586700 |
| H                          | -1.50964600 | 4.68587100  | -0.41233800 | H                          | 4.89355800  | 0.75843400  | -0.48053000 |
| H                          | -2.12952000 | 4.00828200  | -1.93477900 | H                          | 4.23713600  | 1.55458400  | -1.92424500 |
| C                          | -4.28622200 | 2.62588200  | -0.89183500 | C                          | 3.15563600  | 3.77702700  | -0.68764800 |
| H                          | -4.75451100 | 1.78623100  | -0.36406500 | H                          | 2.39985100  | 4.30330300  | -0.09193300 |
| H                          | -5.02486600 | 3.43408500  | -0.96478400 | H                          | 4.04219500  | 4.42058800  | -0.75400300 |
| H                          | -4.03393600 | 2.29438100  | -1.90383400 | H                          | 2.75532900  | 3.63235000  | -1.69581600 |
| C                          | -3.42222400 | 3.58799900  | 1.27398700  | C                          | 4.08997300  | 2.66706400  | 1.37290600  |
| H                          | -2.55360600 | 3.95645300  | 1.82965300  | H                          | 4.37140800  | 1.72692500  | 1.85981900  |
| H                          | -4.15718600 | 4.39997500  | 1.20704000  | H                          | 4.98359300  | 3.30147400  | 1.31440500  |
| H                          | -3.86650300 | 2.77103100  | 1.85246400  | H                          | 3.35604200  | 3.16889300  | 2.01230000  |
| C                          | -4.77673400 | -2.03216500 | -0.53380100 | C                          | -1.15091600 | 4.90088900  | -0.87547900 |
| H                          | -5.03204100 | -1.12182900 | 0.02198800  | H                          | -0.14825000 | 5.03005400  | -0.45030100 |
| H                          | -4.52634700 | -1.74752300 | -1.56061200 | H                          | -1.04083500 | 4.51462900  | -1.89300800 |
| H                          | -5.66641200 | -2.67403700 | -0.55926800 | H                          | -1.62717100 | 5.88828400  | -0.92605700 |
| C                          | -3.99683100 | -3.17688500 | 1.57287300  | C                          | -2.14425700 | 4.52199500  | 1.40969700  |
| H                          | -4.87875900 | -3.82919500 | 1.54895800  | H                          | -2.62247200 | 5.50876400  | 1.36451100  |
| H                          | -3.18773600 | -3.71712700 | 2.07687100  | H                          | -2.75631300 | 3.87480800  | 2.04667500  |
| H                          | -4.23780600 | -2.29602900 | 2.17659400  | H                          | -1.16743600 | 4.63840800  | 1.89180500  |
| C                          | -3.27851800 | -4.05701600 | -0.67858300 | C                          | -3.40580100 | 3.79792000  | -0.64980600 |
| H                          | -2.44794000 | -4.61532500 | -0.22869700 | H                          | -4.04202900 | 3.12673600  | -0.05922400 |
| H                          | -4.15362500 | -4.71848900 | -0.70538600 | H                          | -3.90203700 | 4.77556800  | -0.69956300 |
| H                          | -3.00299200 | -3.80538900 | -1.70723400 | H                          | -3.33261900 | 3.39515800  | -1.66507400 |
| C                          | 1.95630800  | -2.63970100 | -0.74952800 | C                          | -3.13315900 | -1.26488900 | -0.68750900 |
| C                          | 3.20487300  | -3.05257600 | -1.56660400 | C                          | -3.89213100 | -2.34170000 | -1.50030500 |
| C                          | 4.09534400  | -4.08336400 | -0.86153400 | C                          | -5.14370000 | -2.88032900 | -0.79537200 |
| C                          | 4.52906900  | -3.56137900 | 0.51364700  | C                          | -4.78214500 | -3.43668100 | 0.58749100  |

|                      |             |             |             |                      |             |             |             |
|----------------------|-------------|-------------|-------------|----------------------|-------------|-------------|-------------|
| C                    | 3.30354400  | -3.16843700 | 1.34933400  | C                    | -4.04606000 | -2.37606600 | 1.41707700  |
| C                    | 2.39522500  | -2.14234300 | 0.64304900  | C                    | -2.79407400 | -1.82046000 | 0.70988500  |
| N                    | 1.16883000  | -1.66382500 | -1.48992900 | N                    | -1.96371900 | -0.80996800 | -1.42233100 |
| N                    | 1.21638900  | -1.82981700 | 1.51581400  | N                    | -2.15089900 | -0.77263600 | 1.56479200  |
| H                    | 1.36744800  | -3.56593800 | -0.57469000 | H                    | -3.84770600 | -0.42931500 | -0.51992700 |
| H                    | 2.86562300  | -3.44177400 | -2.53666500 | H                    | -4.16057000 | -1.91025600 | -2.47460000 |
| H                    | 3.78824500  | -2.14460400 | -1.77998500 | H                    | -3.19589100 | -3.16852500 | -1.70435000 |
| H                    | 4.97235500  | -4.30993200 | -1.48195300 | H                    | -5.61741000 | -3.65667800 | -1.41039200 |
| H                    | 3.54487900  | -5.02792200 | -0.73701700 | H                    | -5.88315100 | -2.07332300 | -0.68223500 |
| H                    | 5.11865900  | -4.31555800 | 1.05056400  | H                    | -5.68085400 | -3.76988900 | 1.12243600  |
| H                    | 5.18111400  | -2.68474500 | 0.38329200  | H                    | -4.13892300 | -4.32141800 | 0.46862900  |
| H                    | 3.62093800  | -2.75778100 | 2.31837000  | H                    | -3.75184900 | -2.79234500 | 2.39132500  |
| H                    | 2.71195300  | -4.07077900 | 1.56938600  | H                    | -4.73151000 | -1.54034400 | 1.62722800  |
| H                    | 2.93685300  | -1.19773900 | 0.51435100  | H                    | -2.05518000 | -2.62260100 | 0.58800500  |
| H                    | 1.09692600  | -1.98045800 | -2.45945700 | H                    | -2.20821200 | -0.73206800 | -2.41153900 |
| H                    | 0.62697000  | -2.66385500 | 1.57297900  | H                    | -2.76722100 | 0.04520800  | 1.57876100  |
| H                    | 1.56503500  | -1.69384000 | 2.46862200  | H                    | -2.15481200 | -1.11584200 | 2.52886100  |
| C                    | 1.87140900  | 2.36459000  | 0.77867500  | C                    | 1.72611200  | -2.71242100 | -0.69014100 |
| C                    | 2.94664400  | 3.14263800  | 1.57492600  | C                    | 2.93481700  | -3.22597200 | -1.51011000 |
| C                    | 3.53417400  | 4.35891800  | 0.84825100  | C                    | 3.73076200  | -4.33622200 | -0.81261300 |
| C                    | 4.11513200  | 3.94496300  | -0.50878400 | C                    | 4.20639700  | -3.86620900 | 0.56760800  |
| C                    | 3.04221200  | 3.24518100  | -1.35169900 | C                    | 3.01846800  | -3.37377000 | 1.40485600  |
| C                    | 2.40921800  | 2.02930300  | -0.64370500 | C                    | 2.20537900  | -2.26631700 | 0.70547900  |
| N                    | 1.43302100  | 1.20026200  | 1.53484900  | N                    | 1.02906200  | -1.66937300 | -1.42350200 |
| N                    | 1.34110400  | 1.46070400  | -1.53152900 | N                    | 1.05141100  | -1.86257400 | 1.57318200  |
| H                    | 1.00117600  | 3.02846200  | 0.64514400  | H                    | 1.05885400  | -3.58769200 | -0.51992100 |
| H                    | 2.50528600  | 3.43687000  | 2.53522000  | H                    | 2.56460500  | -3.57713300 | -2.48340600 |
| H                    | 3.76597200  | 2.44344900  | 1.81192000  | H                    | 3.59376100  | -2.36980900 | -1.71585700 |
| H                    | 4.30579100  | 4.83277800  | 1.47004300  | H                    | 4.58594200  | -4.63351400 | -1.43373400 |
| H                    | 2.74907400  | 5.11448100  | 0.69241800  | H                    | 3.09994800  | -5.23058500 | -0.69635500 |
| H                    | 4.50491300  | 4.81622100  | -1.05147200 | H                    | 4.72709400  | -4.67374000 | 1.09854500  |
| H                    | 4.96575700  | 3.26446100  | -0.35180700 | H                    | 4.93245800  | -3.04889600 | 0.44511600  |
| H                    | 3.45846600  | 2.92762600  | -2.31870900 | H                    | 3.36850200  | -3.00054300 | 2.37797600  |
| H                    | 2.24468700  | 3.97071900  | -1.57933300 | H                    | 2.34946000  | -4.22318400 | 1.61572600  |
| H                    | 3.16298300  | 1.23866300  | -0.53214500 | H                    | 2.82463000  | -1.37057000 | 0.58882300  |
| H                    | 2.27089900  | 0.72012500  | 1.87701800  | H                    | 0.96667200  | -1.94920600 | -2.40407000 |
| H                    | 0.73226500  | 2.23150400  | -1.81867700 | H                    | 0.42125100  | -2.66458800 | 1.64453700  |
| H                    | 1.79750600  | 1.14610400  | -2.39047700 | H                    | 1.41666800  | -1.73560700 | 2.52106500  |
| <b>DACH-bridge-3</b> |             |             |             | <b>DACH-bridge-4</b> |             |             |             |
| Mo                   | 0.00454600  | -0.29793100 | -1.03347000 | Mo                   | 0.00014500  | -0.00019300 | -1.02281700 |
| O                    | -0.94025700 | -2.25101100 | -0.97364000 | Mo                   | 0.00011000  | -0.00021700 | 1.11524500  |
| C                    | -1.23208200 | -2.77372500 | 0.15902100  | C                    | 2.27056200  | -2.28466000 | -0.94300800 |
| C                    | -1.89576300 | -4.16128900 | 0.16444100  | C                    | 3.38142200  | -2.95805300 | -1.78945700 |
| Mo                   | 0.00051900  | -0.19493500 | 1.10021400  | C                    | 4.13331300  | -4.10205900 | -1.09747500 |
| O                    | -0.97339900 | -2.17752300 | 1.25507300  | C                    | 4.73880400  | -3.62014800 | 0.22557200  |
| C                    | -3.16192300 | -4.11571500 | -0.72014700 | C                    | 3.64083300  | -3.04044600 | 1.12459700  |
| H                    | -3.89330400 | -3.39764400 | -0.32870000 | C                    | 2.83689400  | -1.90240000 | 0.45839300  |
| H                    | -2.91444500 | -3.82522900 | -1.74565200 | N                    | 1.67717600  | -1.17676100 | -1.67856800 |
| H                    | -3.63860000 | -5.10401900 | -0.74397200 | N                    | 1.75886800  | -1.46663700 | 1.40297400  |
| C                    | -2.27706400 | -4.58669900 | 1.59245600  | H                    | 1.48694400  | -3.04407900 | -0.76139300 |
| H                    | -2.74834600 | -5.57752400 | 1.56987400  | H                    | 2.92330000  | -3.30085000 | -2.72596800 |
| H                    | -1.39818300 | -4.64098700 | 2.24347600  | H                    | 4.10886300  | -2.17832500 | -2.07033100 |
| H                    | -2.98468200 | -3.88292000 | 2.04444100  | H                    | 4.91615700  | -4.49567600 | -1.76052200 |
| C                    | -0.89588600 | -5.18147300 | -0.43013000 | H                    | 3.44309300  | -4.93638700 | -0.89771500 |
| H                    | 0.01618000  | -5.24248700 | 0.17676500  | H                    | 5.25327800  | -4.43978400 | 0.74492900  |
| H                    | -1.35020600 | -6.18028200 | -0.45718100 | H                    | 5.49791000  | -2.84954300 | 0.02207800  |
| H                    | -0.61011000 | -4.90428000 | -1.44985600 | H                    | 4.06891600  | -2.67715600 | 2.07057200  |
| C                    | 3.04013100  | -1.56620400 | -0.80794500 | H                    | 2.94183100  | -3.84996800 | 1.39131900  |
| C                    | 4.32588000  | -1.32586700 | -1.63748000 | H                    | 3.49031900  | -1.03080900 | 0.31649000  |
| C                    | 5.60592500  | -1.82477700 | -0.95390500 | H                    | 2.45977100  | -0.60682200 | -2.01947600 |

|   |             |             |             |   |             |             |             |
|---|-------------|-------------|-------------|---|-------------|-------------|-------------|
| C | 5.75576500  | -1.18777200 | 0.43349900  | H | 1.23335300  | -2.29516700 | 1.69214500  |
| C | 4.49597400  | -1.42887500 | 1.27673800  | H | 2.22037000  | -1.12552100 | 2.24945100  |
| C | 3.20931300  | -0.93329100 | 0.58726300  | C | -2.27018300 | 2.28444300  | -0.94314000 |
| N | 1.86625100  | -1.08224200 | -1.51682700 | C | -3.38105100 | 2.95779300  | -1.78961300 |
| N | 2.02226500  | -1.20691600 | 1.45915600  | C | -4.13294600 | 4.10183600  | -1.09769900 |
| H | 2.97479800  | -2.66409000 | -0.63910300 | C | -4.73841700 | 3.61999500  | 0.22538300  |
| H | 4.20014100  | -1.81416000 | -2.61398000 | C | -3.64041600 | 3.04039500  | 1.12443500  |
| H | 4.40657200  | -0.24657500 | -1.83565100 | C | -2.83646300 | 1.90230200  | 0.45832200  |
| H | 6.48088400  | -1.59807500 | -1.57762600 | N | -1.67680600 | 1.17649500  | -1.67865900 |
| H | 5.56875900  | -2.91973000 | -0.85022800 | N | -1.75836100 | 1.46668000  | 1.40287800  |
| H | 6.63545500  | -1.58754700 | 0.95454200  | H | -1.48656000 | 3.04388000  | -0.76158400 |
| H | 5.91977100  | -0.10534400 | 0.32246500  | H | -2.92293500 | 3.30054000  | -2.72614600 |
| H | 4.59389600  | -0.93361500 | 2.25348400  | H | -4.10849700 | 2.17805200  | -2.07044000 |
| H | 4.39591200  | -2.50667700 | 1.47966000  | H | -4.91580500 | 4.49539000  | -1.76076500 |
| H | 3.25501000  | 0.15603000  | 0.46845400  | H | -3.44274400 | 4.93619200  | -0.89799500 |
| H | 1.91171900  | -1.42562100 | -2.47870900 | H | -5.25291500 | 4.43965000  | 0.74468700  |
| H | 1.86260300  | -2.21691900 | 1.47566600  | H | -5.49750000 | 2.84935100  | 0.02194700  |
| H | 2.28479200  | -0.96891800 | 2.41948500  | H | -4.06847800 | 2.67717900  | 2.07044900  |
| C | -2.82132200 | 1.37921500  | -0.84154600 | H | -2.94142800 | 3.84995500  | 1.39107800  |
| C | -4.09214000 | 1.56571100  | -1.70222300 | H | -3.48987400 | 1.03068500  | 0.31654200  |
| C | -5.22899100 | 2.33130500  | -1.01441500 | H | -2.45941400 | 0.60660300  | -2.01963600 |
| C | -5.60756000 | 1.65450800  | 0.30829100  | H | -1.23265200 | 2.29519000  | 1.69172800  |
| C | -4.37358800 | 1.53155800  | 1.21033000  | H | -2.21978700 | 1.12596100  | 2.24956200  |
| C | -3.20214900 | 0.78237500  | 0.54176400  | C | 1.89976100  | 2.70602400  | 0.90937900  |
| N | -1.82226100 | 0.62215300  | -1.58316700 | C | 3.08652500  | 3.25691800  | 1.73711500  |
| N | -2.02705300 | 0.78761800  | 1.46675500  | C | 3.84455100  | 4.40635400  | 1.06077300  |
| H | -2.42054700 | 2.39051700  | -0.62358200 | C | 4.34201800  | 3.97430800  | -0.32418300 |
| H | -3.79896100 | 2.06371600  | -2.63576600 | C | 3.17558800  | 3.45188400  | -1.17304300 |
| H | -4.45983600 | 0.56556100  | -1.98404100 | C | 2.39785500  | 2.30418600  | -0.49577600 |
| H | -6.09946200 | 2.38902900  | -1.68175600 | N | 1.24368200  | 1.61705200  | 1.61593600  |
| H | -4.91524800 | 3.36755900  | -0.81641200 | N | 1.27383300  | 1.86660200  | -1.37504900 |
| H | -6.39432600 | 2.21890500  | 0.82599400  | H | 1.20314200  | 3.56167400  | 0.74591500  |
| H | -6.01855900 | 0.65441500  | 0.10362000  | H | 2.70279200  | 3.57864400  | 2.71601400  |
| H | -4.63436500 | 1.02877000  | 2.15294900  | H | 3.77895800  | 2.42364100  | 1.93123900  |
| H | -4.03166700 | 2.54333100  | 1.48176100  | H | 4.68572400  | 4.72601900  | 1.69048600  |
| H | -3.47181400 | -0.27023400 | 0.39008400  | H | 3.18189000  | 5.27862800  | 0.95441800  |
| H | -2.28815700 | 0.09525000  | -2.32336000 | H | 4.83636700  | 4.80800500  | -0.84001000 |
| H | -1.79064800 | 1.75753500  | 1.69177900  | H | 5.09692300  | 3.18181300  | -0.20980400 |
| H | -2.34181600 | 0.39036300  | 2.35564100  | H | 3.54113300  | 3.10824400  | -2.15130200 |
| C | 0.78053900  | 2.90249600  | 0.83475700  | H | 2.47720600  | 4.27963600  | -1.37387100 |
| C | 1.36968400  | 4.08700600  | 1.64062100  | H | 3.05423100  | 1.43223800  | -0.38359200 |
| C | 1.40017100  | 5.42859400  | 0.89702400  | H | 1.24901200  | 1.83289200  | 2.61498700  |
| C | 2.16268900  | 5.29195500  | -0.42590200 | H | 0.61340400  | 2.63928200  | -1.48420000 |
| C | 1.53905800  | 4.18319800  | -1.28172000 | H | 1.65713100  | 1.72661000  | -2.31335900 |
| C | 1.46811200  | 2.82014000  | -0.56033600 | C | -1.90032400 | -2.70600200 | 0.90945600  |
| N | 0.85769100  | 1.67255100  | 1.61273800  | C | -3.08762700 | -3.25587400 | 1.73710600  |
| N | 0.79739500  | 1.83298900  | -1.45926400 | C | -3.84624800 | -4.40499900 | 1.06089100  |
| H | -0.28460500 | 3.12498000  | 0.64201000  | C | -4.34308600 | -3.97303200 | -0.32431700 |
| H | 0.80161700  | 4.17165100  | 2.57571500  | C | -3.17614200 | -3.45151300 | -1.17303300 |
| H | 2.39986100  | 3.81965300  | 1.92919600  | C | -2.39795700 | -2.30407700 | -0.49582900 |
| H | 1.85891300  | 6.20069900  | 1.52989700  | N | -1.24344700 | -1.61742300 | 1.61591800  |
| H | 0.37192100  | 5.76328700  | 0.68994300  | N | -1.27360000 | -1.86705800 | -1.37492700 |
| H | 2.15897400  | 6.23963600  | -0.98073700 | H | -1.20434600 | -3.56220900 | 0.74625100  |
| H | 3.21664600  | 5.05215700  | -0.21800000 | H | -2.70431000 | -3.57760900 | 2.71616400  |
| H | 2.09261800  | 4.06578100  | -2.22475000 | H | -3.77953900 | -2.42208000 | 1.93086900  |
| H | 0.51541800  | 4.48349400  | -1.55795200 | H | -4.68779400 | -4.72393800 | 1.69047300  |
| H | 2.48792800  | 2.44516600  | -0.39594700 | H | -3.18412500 | -5.27773400 | 0.95496100  |
| H | 1.82694400  | 1.59495200  | 1.93946200  | H | -4.83780200 | -4.80657600 | -0.84004000 |
| H | -0.08562100 | 2.22419900  | -1.79877700 | H | -5.09754800 | -3.18005300 | -0.21035700 |
| H | 1.38402300  | 1.71756200  | -2.28780300 | H | -3.54128000 | -3.10789800 | -2.15145400 |

|                     |             |             |             |                     |             |             |             |
|---------------------|-------------|-------------|-------------|---------------------|-------------|-------------|-------------|
|                     |             |             |             | H                   | -2.47818000 | -4.27970400 | -1.37350100 |
|                     |             |             |             | H                   | -3.05400400 | -1.43186700 | -0.38386300 |
|                     |             |             |             | H                   | -1.24850200 | -1.83342200 | 2.61493600  |
|                     |             |             |             | H                   | -0.61320000 | -2.63984500 | -1.48346900 |
|                     |             |             |             | H                   | -1.65649900 | -1.72742400 | -2.31344700 |
| <b>DACH-chel-1a</b> |             |             |             | <b>DACH-chel-1b</b> |             |             |             |
| Mo                  | -0.37778500 | 0.16707600  | 1.08040500  | Mo                  | -0.41024100 | -0.47935400 | 1.02790400  |
| O                   | -0.94046700 | -1.86821200 | 1.54067300  | O                   | 1.33231300  | 0.05806400  | 2.32042200  |
| O                   | -2.49537700 | 0.50148900  | 0.80288700  | O                   | -1.99305100 | 0.79498100  | 1.62577700  |
| C                   | -3.03247200 | 0.38956700  | -0.35271100 | C                   | -2.39195000 | 1.70332100  | 0.82373700  |
| C                   | -4.53675200 | 0.66250500  | -0.48067700 | C                   | -3.53068500 | 2.64765700  | 1.21383800  |
| Mo                  | -0.21417000 | -0.25269700 | -1.08999900 | Mo                  | -0.21966800 | 0.56566500  | -0.83671800 |
| O                   | -2.35885300 | 0.05962800  | -1.38037100 | O                   | -1.82214000 | 1.85147500  | -0.31649800 |
| O                   | -1.17717100 | -2.22911400 | -0.64506100 | O                   | 1.36603900  | -1.82414500 | 1.19915800  |
| C                   | -1.32134900 | -2.59813400 | 0.56613700  | C                   | 1.92224300  | -1.04245700 | 2.04756300  |
| C                   | -1.92701800 | -3.97349800 | 0.87886200  | C                   | 3.21672000  | -1.43263100 | 2.76144400  |
| O                   | -0.14689000 | 2.26674000  | 0.91617600  | O                   | -1.85212100 | -1.79241500 | 0.18875200  |
| O                   | -0.67665200 | 2.06081100  | -1.23816800 | O                   | -1.62169800 | -0.79049600 | -1.77836900 |
| C                   | -0.43444000 | 2.77773300  | -0.23227500 | C                   | -2.13811200 | -1.71312500 | -1.05309400 |
| C                   | -0.42369100 | 4.30890700  | -0.34788700 | C                   | -3.07774400 | -2.73541900 | -1.70012500 |
| O                   | 1.41070300  | -0.03536400 | 2.12873000  | C                   | 4.11804200  | -0.19037100 | 2.91197600  |
| O                   | 3.09625300  | 0.86532600  | 0.93887100  | H                   | 4.40162200  | 0.21601800  | 1.93345700  |
| C                   | 2.62672000  | 0.42598900  | 1.99670800  | H                   | 3.61426500  | 0.60008000  | 3.47546500  |
| C                   | 3.46681800  | 0.36932200  | 3.29653000  | H                   | 5.03721900  | -0.46512100 | 3.44330600  |
| C                   | -5.00011600 | 0.52132900  | -1.94031600 | C                   | 3.95630300  | -2.53759000 | 1.98656300  |
| H                   | -4.81948600 | -0.48850300 | -2.32304200 | H                   | 4.86704800  | -2.81875000 | 2.52882500  |
| H                   | -6.07627300 | 0.72340900  | -2.00200300 | H                   | 3.33586200  | -3.43128200 | 1.86951900  |
| H                   | -4.48108600 | 1.22798600  | -2.59616500 | H                   | 4.25029000  | -2.19727200 | 0.98710400  |
| C                   | -5.28953600 | -0.35232200 | 0.41084100  | C                   | 2.81761100  | -1.95584400 | 4.16464200  |
| H                   | -4.98092900 | -0.26725300 | 1.45723800  | H                   | 2.16683900  | -2.83516300 | 4.09147100  |
| H                   | -6.36804000 | -0.16313300 | 0.35115700  | H                   | 3.71922200  | -2.24606600 | 4.71751300  |
| H                   | -5.10992300 | -1.38216900 | 0.07910600  | H                   | 2.29542800  | -1.18431500 | 4.74040400  |
| C                   | -4.81419900 | 2.09760400  | 0.02341400  | C                   | -4.62545700 | 2.58300700  | 0.12498000  |
| H                   | -4.28044300 | 2.84085600  | -0.58057900 | H                   | -5.43736900 | 3.27618900  | 0.37655300  |
| H                   | -5.88749100 | 2.31007800  | -0.05067600 | H                   | -4.22561600 | 2.85990300  | -0.85538000 |
| H                   | -4.50852100 | 2.21740200  | 1.06706300  | H                   | -5.05154500 | 1.57516900  | 0.05058100  |
| C                   | -1.20569600 | 4.92137100  | 0.83324600  | C                   | -4.12370300 | 2.25629000  | 2.57827900  |
| H                   | -0.77052600 | 4.62735900  | 1.79262400  | H                   | -3.37111000 | 2.30720100  | 3.37188700  |
| H                   | -1.18267800 | 6.01570500  | 0.76209700  | H                   | -4.93831600 | 2.94470200  | 2.83380200  |
| H                   | -2.25573600 | 4.60459600  | 0.82206000  | H                   | -4.52875100 | 1.23865900  | 2.56312000  |
| C                   | 1.05626800  | 4.75972000  | -0.28109100 | C                   | -2.95822800 | 4.08401100  | 1.28377100  |
| H                   | 1.52074900  | 4.45783200  | 0.66309900  | H                   | -2.17157700 | 4.16027400  | 2.04390700  |
| H                   | 1.63911100  | 4.32941400  | -1.10386500 | H                   | -2.53565100 | 4.38781300  | 0.32084700  |
| H                   | 1.11015600  | 5.85249300  | -0.36095300 | H                   | -3.75686100 | 4.78739300  | 1.54985100  |
| C                   | -1.04386600 | 4.76110200  | -1.68083500 | C                   | -4.23051900 | -1.97610400 | -2.39572400 |
| H                   | -1.01296300 | 5.85560700  | -1.74684100 | H                   | -3.84845300 | -1.28190300 | -3.15044800 |
| H                   | -0.50011800 | 4.34832000  | -2.53585700 | H                   | -4.90075100 | -2.69086600 | -2.88877400 |
| H                   | -2.09004000 | 4.44503100  | -1.76336600 | H                   | -4.82118400 | -1.40348500 | -1.67050200 |
| C                   | -3.02669400 | -3.80706600 | 1.95049900  | C                   | -3.64901700 | -3.70206800 | -0.64889500 |
| H                   | -2.62519600 | -3.36266300 | 2.86563400  | H                   | -4.32226900 | -4.41715900 | -1.13716700 |
| H                   | -3.84167700 | -3.16947600 | 1.58865800  | H                   | -2.85525200 | -4.26637600 | -0.14843300 |
| H                   | -3.44935400 | -4.78843000 | 2.19655600  | H                   | -4.21787600 | -3.16782400 | 0.11961600  |
| C                   | -0.79084200 | -4.86216800 | 1.44235900  | C                   | -2.27209000 | -3.52896400 | -2.75629800 |
| H                   | -1.19159600 | -5.85113700 | 1.69451800  | H                   | -2.92554800 | -4.25996100 | -3.24788500 |
| H                   | 0.00987100  | -5.00355400 | 0.70590500  | H                   | -1.86281800 | -2.86349700 | -3.52313800 |
| H                   | -0.35732400 | -4.42472400 | 2.34719700  | H                   | -1.44208300 | -4.07641600 | -2.29296600 |
| C                   | -2.51744000 | -4.62014200 | -0.38548000 | C                   | 2.36581600  | 1.73938400  | -1.66481000 |
| H                   | -1.75524000 | -4.76778700 | -1.15711900 | C                   | 3.61974400  | 2.60387600  | -1.46734200 |
| H                   | -2.94036600 | -5.59922000 | -0.13062600 | C                   | 4.65586300  | 2.35839100  | -2.57940400 |
| H                   | -3.31617200 | -4.00564400 | -0.81485700 | C                   | 5.02025700  | 0.86921400  | -2.70822000 |



|                     |             |             |             |                    |             |             |             |
|---------------------|-------------|-------------|-------------|--------------------|-------------|-------------|-------------|
| C                   | 2.32049100  | -0.23282500 | -2.58972400 | C                  | 3.77021400  | -0.00817900 | -2.90505100 |
| C                   | 3.62865900  | 0.41894800  | -3.05634400 | C                  | 2.75902800  | 0.25165900  | -1.78354100 |
| C                   | 4.43137600  | -0.55789700 | -3.93773600 | N                  | 1.34770200  | 1.88877500  | -0.62456200 |
| C                   | 4.67788400  | -1.90752100 | -3.23872300 | N                  | 1.48319800  | -0.52008900 | -1.91820000 |
| C                   | 3.36633700  | -2.55595700 | -2.75218200 | H                  | 1.91329900  | 2.02795700  | -2.63015700 |
| C                   | 2.60153600  | -1.56238700 | -1.87355400 | H                  | 3.33036500  | 3.66155500  | -1.43380900 |
| N                   | 1.50990200  | 0.57688500  | -1.68703800 | H                  | 4.06472400  | 2.36477100  | -0.48840600 |
| N                   | 1.26889900  | -2.02134700 | -1.39814200 | H                  | 5.56037200  | 2.94949500  | -2.38611000 |
| H                   | 1.72050100  | -0.46049400 | -3.48780100 | H                  | 4.24869200  | 2.71489200  | -3.53741000 |
| H                   | 3.40770100  | 1.34308000  | -3.60423600 | H                  | 5.71460700  | 0.71863500  | -3.54450700 |
| H                   | 4.22119800  | 0.70137400  | -2.17396600 | H                  | 5.54887500  | 0.54422800  | -1.79973100 |
| H                   | 5.39052400  | -0.10417100 | -4.21791300 | H                  | 4.04628400  | -1.07111700 | -2.93542500 |
| H                   | 3.88247900  | -0.73202400 | -4.87537100 | H                  | 3.30471600  | 0.22964000  | -3.87455800 |
| H                   | 5.20012600  | -2.59398000 | -3.91696200 | H                  | 3.19199400  | -0.05218300 | -0.82213100 |
| H                   | 5.34205000  | -1.75335200 | -2.37574900 | H                  | 1.78813700  | 2.01088800  | 0.28753900  |
| H                   | 3.57679100  | -3.48250800 | -2.20140000 | H                  | 1.22731700  | -0.60077400 | -2.90552000 |
| H                   | 2.74565200  | -2.82968000 | -3.61952600 | H                  | 1.60497400  | -1.47586200 | -1.58246600 |
| H                   | 3.18583200  | -1.33612000 | -0.97397300 |                    |             |             |             |
| H                   | 2.08652900  | 0.98042400  | -0.94283700 |                    |             |             |             |
| H                   | 0.81702000  | -2.61757900 | -2.09572600 |                    |             |             |             |
| H                   | 1.34867800  | -2.59283900 | -0.55835900 |                    |             |             |             |
| C                   | 2.77405800  | 1.23749900  | 4.37130800  |                    |             |             |             |
| H                   | 1.76736500  | 0.86835000  | 4.59034200  |                    |             |             |             |
| H                   | 3.35863700  | 1.21885900  | 5.30008400  |                    |             |             |             |
| H                   | 2.69302700  | 2.28207000  | 4.04568900  |                    |             |             |             |
| C                   | 3.53686100  | -1.09505200 | 3.78449000  |                    |             |             |             |
| H                   | 4.01828900  | -1.73970200 | 3.03778900  |                    |             |             |             |
| H                   | 4.12766100  | -1.15366800 | 4.70765500  |                    |             |             |             |
| H                   | 2.53789300  | -1.49259500 | 3.98768300  |                    |             |             |             |
| C                   | 4.88751300  | 0.89881900  | 3.04275500  |                    |             |             |             |
| H                   | 5.40533900  | 0.30567000  | 2.28131800  |                    |             |             |             |
| H                   | 4.87142800  | 1.93859500  | 2.69952700  |                    |             |             |             |
| H                   | 5.47229700  | 0.85206600  | 3.97034100  |                    |             |             |             |
| <b>DACH-chel-1s</b> |             |             |             | <b>DACH-chel-2</b> |             |             |             |
| Mo                  | 0.55290000  | 0.22633000  | 1.13304800  | Mo                 | -0.39464500 | -0.49921600 | 0.94686600  |
| O                   | -0.99284600 | 1.39468100  | 1.61428200  | O                  | -1.88864800 | 0.86522900  | 1.71630600  |
| O                   | 1.48037100  | 1.89802800  | 0.28019700  | C                  | -2.32712700 | 1.77752300  | 0.93282700  |
| C                   | 1.48865300  | 2.05892000  | -1.00031000 | C                  | -3.35599600 | 2.78149900  | 1.46738100  |
| C                   | 2.10975700  | 3.34219700  | -1.55142000 | Mo                 | -0.39464600 | 0.49920700  | -0.94686800 |
| Mo                  | 0.12408700  | -0.65748800 | -0.89465400 | O                  | -1.90305900 | 1.86506400  | -0.26942200 |
| O                   | 1.00689700  | 1.18367200  | -1.77311700 | O                  | -1.90305200 | -1.86507900 | 0.26941700  |
| O                   | -1.70798300 | 2.67587100  | -0.08546700 | O                  | -1.88864200 | -0.86524400 | -1.71631100 |
| C                   | -1.89065200 | 2.17323000  | 1.01706900  | C                  | -2.32706800 | -1.77758100 | -0.93285300 |
| C                   | -3.15071200 | 2.42613400  | 1.86855200  | C                  | -3.35603900 | -2.78147500 | -1.46736800 |
| O                   | 2.54126100  | -0.55961900 | 0.98504600  | C                  | -4.58122900 | 1.99984900  | 1.99427500  |
| O                   | 2.14283900  | -1.41433800 | -1.03457800 | H                  | -4.29285800 | 1.29887400  | 2.78368800  |
| C                   | 2.91623300  | -1.23480300 | -0.03628700 | H                  | -5.32011700 | 2.69943400  | 2.40437600  |
| C                   | 4.32420900  | -1.82992600 | -0.03190100 | H                  | -5.06378300 | 1.43122900  | 1.19002700  |
| O                   | 0.21863600  | -1.12978100 | 2.58085300  | C                  | -3.79655500 | 3.75943000  | 0.36498500  |
| O                   | -1.27448800 | -2.79037100 | 2.28118000  | H                  | -4.53567600 | 4.46133800  | 0.77063200  |
| C                   | -0.41398600 | -2.22455200 | 2.95669300  | H                  | -2.95047200 | 4.33848700  | -0.01977500 |
| C                   | -0.00403600 | -2.71864500 | 4.32830900  | H                  | -4.25332500 | 3.23206000  | -0.47921500 |
| H                   | -0.53702600 | -3.63723700 | 4.58004400  | C                  | -2.70736100 | 3.56619500  | 2.63227800  |
| H                   | -0.22189700 | -1.94873300 | 5.07707100  | H                  | -1.82835000 | 4.12739100  | 2.29178900  |
| H                   | 1.07673100  | -2.89627100 | 4.35175000  | H                  | -3.42769300 | 4.28435400  | 3.04325000  |
| C                   | 2.02773700  | 3.37106100  | -3.08681400 | H                  | -2.39559900 | 2.89244600  | 3.43678000  |
| H                   | 0.98995100  | 3.33539000  | -3.43341300 | C                  | -3.79678200 | -3.75925100 | -0.36490800 |
| H                   | 2.48095400  | 4.29840100  | -3.45643100 | H                  | -4.53596700 | -4.46110400 | -0.77053300 |
| H                   | 2.56234400  | 2.52684700  | -3.53467700 | H                  | -2.95079300 | -4.33837700 | 0.01995200  |
| C                   | 1.34067800  | 4.54577700  | -0.95633400 | H                  | -4.25353500 | -3.23174900 | 0.47921800  |

|   |             |             |             |   |             |             |             |
|---|-------------|-------------|-------------|---|-------------|-------------|-------------|
| H | 1.41300600  | 4.56137200  | 0.13515000  | C | -2.70744400 | -3.56635500 | -2.63216100 |
| H | 1.77020500  | 5.47577800  | -1.34722400 | H | -3.42784200 | -4.28447100 | -3.04309300 |
| H | 0.28043400  | 4.51274300  | -1.22839100 | H | -2.39557100 | -2.89272000 | -3.43671400 |
| C | 3.58822400  | 3.39595100  | -1.09835700 | H | -1.82851300 | -4.12762000 | -2.29158000 |
| H | 4.16026500  | 2.55147900  | -1.50102000 | C | -4.58114500 | -1.99971500 | -1.99439500 |
| H | 4.04682800  | 4.32040400  | -1.46841500 | H | -4.29263900 | -1.29883300 | -2.78384200 |
| H | 3.67073400  | 3.38166000  | -0.00746400 | H | -5.32009500 | -2.69923800 | -2.40449000 |
| C | 5.33458800  | -0.66389800 | 0.09123400  | H | -5.06367900 | -1.43097600 | -1.19021900 |
| H | 5.16777700  | -0.08785300 | 1.00620600  | C | 2.10087800  | 1.77861400  | -1.92136300 |
| H | 6.35253800  | -1.06969400 | 0.11695300  | C | 3.33047800  | 2.70355700  | -1.88339000 |
| H | 5.26411500  | 0.01658300  | -0.76546500 | C | 4.26304100  | 2.43891000  | -3.07976200 |
| C | 4.44903900  | -2.75625200 | 1.20156800  | C | 4.68025600  | 0.95953300  | -3.15942900 |
| H | 4.28054800  | -2.20451400 | 2.13106900  | C | 3.46283100  | 0.01554200  | -3.14665200 |
| H | 3.73055400  | -3.58305700 | 1.15323800  | C | 2.56342700  | 0.31513300  | -1.94320000 |
| H | 5.45705100  | -3.18572700 | 1.23046400  | N | 1.17617900  | 1.93117700  | -0.79124200 |
| C | 4.58993100  | -2.62572800 | -1.32028300 | N | 1.36842600  | -0.58129300 | -1.84236000 |
| H | 5.60592400  | -3.03607400 | -1.28871800 | H | 1.59462000  | 1.96935000  | -2.89190700 |
| H | 3.88842500  | -3.45918200 | -1.42999400 | H | 3.00204900  | 3.75231500  | -1.87921100 |
| H | 4.50442000  | -1.99244400 | -2.20917400 | H | 3.87013200  | 2.53636600  | -0.93879700 |
| C | -2.72900300 | 3.17201300  | 3.15631300  | H | 5.15509000  | 3.07577100  | -3.01400600 |
| H | -2.02966400 | 2.57574800  | 3.75029200  | H | 3.74699300  | 2.71966700  | -4.01018400 |
| H | -2.25211800 | 4.13150600  | 2.92145400  | H | 5.28082200  | 0.78134300  | -4.06085800 |
| H | -3.61525000 | 3.37744700  | 3.76938700  | H | 5.32572000  | 0.71987000  | -2.30114800 |
| C | -3.79413400 | 1.07191800  | 2.24182000  | H | 3.79281900  | -1.03193900 | -3.11864800 |
| H | -4.69432400 | 1.24552100  | 2.84417000  | H | 2.88468500  | 0.14534900  | -4.07475400 |
| H | -4.09221200 | 0.51253900  | 1.34653100  | H | 3.14181400  | 0.14780500  | -1.02625200 |
| H | -3.10720900 | 0.44829300  | 2.82159700  | H | 0.85757900  | 2.90181500  | -0.74532700 |
| C | -4.15335400 | 3.28097200  | 1.07646400  | H | 1.17909600  | -1.03940800 | -2.73457700 |
| H | -4.46446700 | 2.77986200  | 0.15339100  | H | 1.53801100  | -1.31679700 | -1.12391900 |
| H | -5.04710400 | 3.46027300  | 1.68651600  | C | 2.10088000  | -1.77862400 | 1.92135700  |
| H | -3.72402700 | 4.25000900  | 0.80194200  | C | 3.33048000  | -2.70356700 | 1.88338200  |
| C | -2.15239900 | -2.25403000 | -1.58028500 | C | 4.26304600  | -2.43892000 | 3.07975200  |
| C | -3.27609900 | -3.25179100 | -1.29835500 | C | 4.68026100  | -0.95954200 | 3.15941900  |
| C | -4.26685400 | -3.24261700 | -2.48128500 | C | 3.46283500  | -0.01555200 | 3.14664400  |
| C | -4.78195200 | -1.82769100 | -2.81075100 | C | 2.56342900  | -0.31514300 | 1.94319300  |
| C | -3.63465100 | -0.81961800 | -3.03392100 | N | 1.17618000  | -1.93118700 | 0.79123800  |
| C | -2.69736500 | -0.82752600 | -1.82062300 | N | 1.36842800  | 0.58128300  | 1.84235500  |
| N | -1.13871700 | -2.08320900 | -0.52970800 | H | 1.59462300  | -1.96935900 | 2.89190200  |
| N | -1.49925900 | 0.01336800  | -1.90877500 | H | 3.00205200  | -3.75232500 | 1.87920400  |
| H | -1.63498800 | -2.55748800 | -2.50368400 | H | 3.87013300  | -2.53637600 | 0.93878800  |
| H | -2.86699700 | -4.25909300 | -1.14923400 | H | 5.15509500  | -3.07578000 | 3.01399500  |
| H | -3.79417400 | -2.97165000 | -0.36991200 | H | 3.74700000  | -2.71967700 | 4.01017600  |
| H | -5.11236800 | -3.90654700 | -2.26110100 | H | 5.28082700  | -0.78135200 | 4.06084700  |
| H | -3.76545900 | -3.65923600 | -3.36750900 | H | 5.32572300  | -0.71987900 | 2.30113700  |
| H | -5.42387600 | -1.86554700 | -3.70014400 | H | 3.79282300  | 1.03192900  | 3.11864000  |
| H | -5.41495800 | -1.47299500 | -1.98384200 | H | 2.88469000  | -0.14536000 | 4.07474700  |
| H | -4.03905000 | 0.18856400  | -3.19573300 | H | 3.14181500  | -0.14781500 | 1.02624400  |
| H | -3.06162500 | -1.08560800 | -3.93403800 | H | 0.85757600  | -2.90182400 | 0.74532600  |
| H | -3.29638400 | -0.55054200 | -0.93224900 | H | 1.17910000  | 1.03939900  | 2.73457200  |
| H | -1.42905700 | -2.36586200 | 0.41470100  | H | 1.53801300  | 1.31678700  | 1.12391400  |
| H | -1.70681300 | 1.01074200  | -1.94101500 |   |             |             |             |

**Table 5SI.** The Cartesian Coordinates of 3-phenyl-propane-1,2-diamine (**13**, **PhPDA**) substituted dimolybdenum *tetrakis*( $\mu$ -pivalate) **Mo2** complexes.

| <b>PhPDA-bridge-1</b> |             |             |             | <b>PhPDA-bridge-2-cis-a</b> |             |             |             |
|-----------------------|-------------|-------------|-------------|-----------------------------|-------------|-------------|-------------|
| C                     | 4.91383400  | -1.00104100 | 0.21825000  | C                           | -3.30295800 | -3.89761700 | -0.02559800 |
| C                     | 4.95628000  | -1.53397000 | 1.51622300  | C                           | -2.73969500 | -4.91695700 | -0.81040100 |
| C                     | 5.82494800  | -1.01248200 | 2.48234500  | C                           | -3.41055600 | -5.42004300 | -1.93137500 |
| C                     | 6.66999100  | 0.05445100  | 2.16406100  | C                           | -4.66310200 | -4.91135400 | -2.28788200 |
| C                     | 6.64187600  | 0.59330400  | 0.87211400  | C                           | -5.23995400 | -3.89826000 | -1.51234500 |
| C                     | 5.77302900  | 0.06859000  | -0.08794600 | C                           | -4.56546400 | -3.40016900 | -0.39426300 |
| C                     | 3.96330000  | -1.54706000 | -0.82601600 | C                           | -2.57363200 | -3.33226300 | 1.17368000  |
| C                     | 2.70072200  | -0.66203700 | -1.04899900 | C                           | -1.87228600 | -1.96798500 | 0.89346200  |
| C                     | 1.89355200  | -1.26866400 | -2.20429700 | C                           | -1.25358900 | -1.46998500 | 2.20830100  |
| N                     | 1.91282000  | -0.52392900 | 0.15982600  | N                           | -0.88684400 | -2.06538200 | -0.16092500 |
| N                     | 0.80136900  | -0.37372400 | -2.69089200 | N                           | -0.88588000 | -0.02404100 | 2.17027100  |
| H                     | 4.30696700  | -2.36880500 | 1.77082300  | H                           | -1.76861500 | -5.32347000 | -0.53674800 |
| H                     | 5.84144600  | -1.44264100 | 3.48081700  | H                           | -2.95524100 | -6.21172300 | -2.52167700 |
| H                     | 7.34733300  | 0.45950100  | 2.91159200  | H                           | -5.18837100 | -5.30405000 | -3.15488500 |
| H                     | 7.29968800  | 1.41911800  | 0.61185500  | H                           | -6.21802200 | -3.50165100 | -1.77460200 |
| H                     | 5.76414200  | 0.49058200  | -1.09126200 | H                           | -5.02698300 | -2.61898300 | 0.20715900  |
| H                     | 4.49582300  | -1.63759200 | -1.78242500 | H                           | -3.28985300 | -3.19363200 | 1.99530100  |
| H                     | 3.63259400  | -2.55262200 | -0.53706200 | H                           | -1.81259300 | -4.04524900 | 1.51511000  |
| H                     | 3.07048200  | 0.32486100  | -1.39934000 | H                           | -2.68842200 | -1.25052600 | 0.64135800  |
| H                     | 2.57472700  | -1.48552400 | -3.03726200 | H                           | -1.96612700 | -1.63227200 | 3.02838200  |
| H                     | 1.43067100  | -2.20641200 | -1.88329800 | H                           | -0.34407700 | -2.03867900 | 2.42296300  |
| H                     | 2.53180800  | -0.37763000 | 0.95863500  | H                           | -1.27652900 | -2.60416900 | -0.93621100 |
| H                     | 0.41803200  | -0.78504100 | -3.54471300 | H                           | -0.58675300 | 0.24717100  | 3.10944600  |
| H                     | 1.21091600  | 0.51567700  | -2.98416600 | H                           | -1.72393000 | 0.52918600  | 1.98120000  |
| Mo                    | -0.97426400 | 0.06146600  | -1.32572900 | Mo                          | 0.70846000  | 0.75597500  | 0.73135300  |
| O                     | -1.51236200 | -2.02602800 | -1.26906300 | O                           | 2.17974800  | -0.32815100 | 1.89894200  |
| O                     | -0.52514500 | 2.16718600  | -1.47840900 | O                           | 2.32807100  | 1.72785100  | -0.30724000 |
| O                     | -2.86095100 | 0.54800100  | -0.42709000 | C                           | 2.61978400  | -1.42887500 | 1.41311200  |
| C                     | -1.26268000 | -2.66886800 | -0.19266200 | C                           | 3.71810300  | -2.18613500 | 2.17140500  |
| C                     | -1.73886700 | -4.12291200 | -0.07712300 | Mo                          | 0.65371300  | -0.77722400 | -0.75030700 |
| Mo                    | -0.03135600 | -0.06157400 | 0.58170100  | C                           | 2.76106700  | 1.23195200  | -1.40128700 |
| C                     | 0.01845600  | 2.72956800  | -0.46966000 | O                           | 2.15898000  | -1.88705700 | 0.31608900  |
| C                     | -2.93210900 | 0.63393000  | 0.84576200  | O                           | 2.23919100  | 0.17165900  | -1.89199600 |
| O                     | -0.63292900 | -2.12099400 | 0.77546500  | C                           | 3.91064700  | 1.94335400  | -2.12810200 |
| O                     | 0.36282900  | 2.05446400  | 0.56220200  | C                           | 3.42184600  | 3.34926800  | -2.55048100 |
| O                     | -1.90311200 | 0.42942700  | 1.57644900  | H                           | 4.23341900  | 3.89222100  | -3.05123400 |
| C                     | 0.27417800  | 4.24195600  | -0.46849100 | H                           | 2.57900900  | 3.28258600  | -3.24963500 |
| C                     | -4.27835200 | 0.99942400  | 1.48513200  | H                           | 3.09970400  | 3.93124000  | -1.68130400 |
| C                     | -0.48796200 | 4.86291900  | 0.72548100  | C                           | 5.10075900  | 2.08780000  | -1.15260600 |
| H                     | -0.15995000 | 4.42583700  | 1.67356700  | H                           | 5.46955300  | 1.10659000  | -0.82982100 |
| H                     | -0.30496800 | 5.94397900  | 0.75966300  | H                           | 5.92652500  | 2.61366300  | -1.64813800 |
| H                     | -1.56918700 | 4.70579700  | 0.63019900  | H                           | 4.81390100  | 2.65462600  | -0.26163000 |
| C                     | -0.20369900 | 4.88418200  | -1.78157100 | C                           | 4.35135800  | 1.15278000  | -3.37161600 |
| H                     | -0.01247400 | 5.96390700  | -1.75279100 | H                           | 3.53105000  | 1.04151600  | -4.08857300 |
| H                     | 0.32278100  | 4.46804600  | -2.64728800 | H                           | 5.17287900  | 1.68104900  | -3.87149900 |
| H                     | -1.27689100 | 4.73091700  | -1.93582600 | H                           | 4.70201200  | 0.14977900  | -3.10555600 |
| C                     | 1.79143300  | 4.48112400  | -0.28923000 | C                           | 4.96648700  | -1.27732900 | 2.25996700  |
| H                     | 2.36222900  | 4.05060300  | -1.12133500 | H                           | 5.35199500  | -1.03641500 | 1.26186300  |
| H                     | 1.99660700  | 5.55839400  | -0.26113500 | H                           | 4.73548300  | -0.33831200 | 2.77279100  |
| H                     | 2.15389300  | 4.03497100  | 0.64182800  | H                           | 5.76218800  | -1.78951300 | 2.81555200  |
| C                     | -4.66444500 | 2.42355700  | 1.02019600  | C                           | 4.08093600  | -3.49675600 | 1.45287600  |
| H                     | -5.63185900 | 2.70598600  | 1.45384400  | H                           | 4.86791200  | -4.01761000 | 2.01263300  |
| H                     | -3.92064300 | 3.16141800  | 1.34451900  | H                           | 3.21602900  | -4.16430700 | 1.37617000  |
| H                     | -4.74696100 | 2.47472800  | -0.07016400 | H                           | 4.44946500  | -3.30892100 | 0.43893400  |
| C                     | -5.34716400 | -0.00652300 | 1.00085600  | C                           | 3.20971600  | -2.49662000 | 3.59794200  |



|                               |             |             |             |                        |             |             |             |
|-------------------------------|-------------|-------------|-------------|------------------------|-------------|-------------|-------------|
| O                             | 1.50069600  | 1.49618600  | -1.06961300 | H                      | -1.23811500 | -5.64951500 | 0.03620400  |
| C                             | 3.40924900  | 3.00286500  | -0.86746200 | H                      | -1.81289300 | -4.18941700 | 0.87279900  |
| C                             | 3.36670900  | 4.18226000  | 0.13129500  | C                      | -5.48160000 | -0.45941800 | -0.51833700 |
| H                             | 4.03198000  | 4.98556300  | -0.20982900 | C                      | -5.97867300 | 0.10077500  | 0.66943800  |
| H                             | 2.35376000  | 4.59616900  | 0.21238600  | C                      | -6.79811800 | -0.63901300 | 1.52986700  |
| H                             | 3.69114200  | 3.86662600  | 1.12805400  | C                      | -7.13705900 | -1.95860500 | 1.21578900  |
| C                             | 4.84871900  | 2.44462300  | -0.93880400 | C                      | -6.65174900 | -2.53016200 | 0.03349900  |
| H                             | 4.91243000  | 1.60376000  | -1.64005100 | C                      | -5.83492300 | -1.78584500 | -0.82200900 |
| H                             | 5.53603900  | 3.22643100  | -1.28651300 | C                      | -4.58234800 | 0.32981000  | -1.44459300 |
| H                             | 5.18762800  | 2.09746600  | 0.04237500  | C                      | -3.06765100 | -0.01725000 | -1.30342100 |
| C                             | 2.97391000  | 3.49040200  | -2.25962200 | C                      | -2.29578000 | 0.79926500  | -2.34800100 |
| H                             | 1.95749500  | 3.89779900  | -2.24222300 | N                      | -2.57720200 | 0.22455700  | 0.03735200  |
| H                             | 3.65439400  | 4.27996200  | -2.60321300 | N                      | -0.91196600 | 0.29027000  | -2.57477800 |
| H                             | 2.99492500  | 2.67750700  | -2.99285000 | H                      | -5.72346700 | 1.12807900  | 0.91911700  |
| C                             | 5.03430700  | -2.08318600 | -1.30008400 | H                      | -7.17322100 | -0.18201100 | 2.44262800  |
| H                             | 5.07327100  | -1.07548100 | -1.73113900 | H                      | -7.77639100 | -2.53414700 | 1.88054900  |
| H                             | 5.30114700  | -2.01106100 | -0.24112000 | H                      | -6.91395000 | -3.55359600 | -0.22439500 |
| H                             | 5.78915400  | -2.69715100 | -1.80782000 | H                      | -5.46940600 | -2.23791200 | -1.74231800 |
| C                             | 3.29708800  | -2.80555000 | -2.97784100 | H                      | -4.88733600 | 0.14190200  | -2.48361100 |
| H                             | 4.04606900  | -3.42539700 | -3.48705200 | H                      | -4.70544500 | 1.40342600  | -1.25302900 |
| H                             | 2.31203400  | -3.25535700 | -3.13908500 | H                      | -2.96754700 | -1.08540800 | -1.60045700 |
| H                             | 3.29372900  | -1.81694800 | -3.44884500 | H                      | -2.84426600 | 0.78400800  | -3.29941700 |
| C                             | 3.62606200  | -4.12830100 | -0.85837600 | H                      | -2.21479800 | 1.83728200  | -2.01217700 |
| H                             | 2.64220700  | -4.60205500 | -0.96418400 | H                      | -3.18137100 | -0.27739500 | 0.69186200  |
| H                             | 4.36229600  | -4.76401900 | -1.36651500 | H                      | -0.50110500 | 0.82404100  | -3.34306000 |
| H                             | 3.87868900  | -4.09347800 | 0.20635500  | H                      | -0.96620900 | -0.67208500 | -2.91283700 |
| C                             | -3.25800400 | 3.55743700  | 0.27539000  | C                      | 5.48096400  | -0.27957200 | 0.53597800  |
| C                             | -4.10671800 | 2.92686900  | -0.64837600 | C                      | 5.99084400  | 0.30065200  | -0.63657500 |
| C                             | -4.54684100 | 3.59452500  | -1.79726100 | C                      | 6.82349300  | -0.42345800 | -1.49797000 |
| C                             | -4.14466100 | 4.91073000  | -2.04187900 | C                      | 7.16348600  | -1.74642100 | -1.19983600 |
| C                             | -3.30123300 | 5.55373800  | -1.12789400 | C                      | 6.66640200  | -2.33743600 | -0.03206300 |
| C                             | -2.86518900 | 4.88219600  | 0.01723300  | C                      | 5.83623200  | -1.60910900 | 0.82408500  |
| C                             | -2.76609400 | 2.83348400  | 1.51035300  | C                      | 4.56382900  | 0.48783800  | 1.46333700  |
| C                             | -1.30306300 | 2.30489600  | 1.39641700  | C                      | 3.05568100  | 0.13018700  | 1.29104600  |
| C                             | -0.93208900 | 1.66999600  | 2.74266700  | C                      | 2.25747500  | 0.87797900  | 2.36801100  |
| N                             | -1.14229500 | 1.38679200  | 0.28915700  | N                      | 2.57354000  | 0.43817600  | -0.04021900 |
| N                             | 0.51958400  | 1.34715800  | 2.86089600  | N                      | 0.89436600  | 0.30871600  | 2.57651900  |
| H                             | -4.42914000 | 1.90461200  | -0.46317700 | H                      | 5.73567900  | 1.33101300  | -0.87371400 |
| H                             | -5.20467600 | 3.08564200  | -2.49773900 | H                      | 7.20790300  | 0.04838300  | -2.39921200 |
| H                             | -4.48694100 | 5.43248500  | -2.93202600 | H                      | 7.81274300  | -2.30971400 | -1.86546000 |
| H                             | -2.98654200 | 6.57934700  | -1.30559500 | H                      | 6.92965100  | -3.36355800 | 0.21390500  |
| H                             | -2.21438800 | 5.39381400  | 0.72404100  | H                      | 5.46129300  | -2.07607400 | 1.73310300  |
| H                             | -2.82194200 | 3.51467900  | 2.37052100  | H                      | 4.85523700  | 0.28107900  | 2.50252200  |
| H                             | -3.42279100 | 1.98015000  | 1.72283300  | H                      | 4.68140900  | 1.56597500  | 1.29489500  |
| H                             | -0.65716300 | 3.20163800  | 1.27717200  | H                      | 2.96724700  | -0.95352800 | 1.52992800  |
| H                             | -1.21488900 | 2.36144100  | 3.54806800  | H                      | 2.80664400  | 0.84797300  | 3.31869700  |
| H                             | -1.49164500 | 0.73821000  | 2.87317200  | H                      | 2.13739100  | 1.92362700  | 2.07100100  |
| H                             | -1.64394000 | 1.74548500  | -0.52471100 | H                      | 3.21373200  | 0.01277200  | -0.71490500 |
| H                             | 0.70378400  | 1.09916900  | 3.83518400  | H                      | 0.45114000  | 0.82245600  | 3.34045400  |
| H                             | 1.05475800  | 2.20452300  | 2.70174300  | H                      | 0.98782400  | -0.65071900 | 2.91425500  |
| <b>PhPDA-bridge-2-trans-b</b> |             |             |             | <b>PhPDA-bridge-3a</b> |             |             |             |
| Mo                            | 0.00546300  | 0.01339400  | 0.01366300  | Mo                     | -0.59842400 | 0.33062800  | -0.08738400 |
| O                             | 0.51322900  | 2.14631200  | 0.01137300  | O                      | -1.92457800 | 0.60686400  | 1.61805400  |
| O                             | -0.50783700 | -2.12375400 | 0.01104100  | C                      | -1.75709500 | -0.10470600 | 2.66731500  |
| C                             | 0.63093700  | 2.74692000  | -1.10876500 | C                      | -2.70798300 | 0.10970200  | 3.85547300  |
| C                             | 0.97782900  | 4.24492400  | -1.09470900 | Mo                     | 0.44068100  | -1.21227400 | 0.95827900  |
| Mo                            | -0.00177300 | 0.01360600  | -1.12753400 | O                      | -0.82749700 | -0.97811300 | 2.73075200  |
| C                             | -0.63775700 | -2.72123300 | -1.10653600 | C                      | -2.61910800 | 1.58719800  | 4.30211300  |
| O                             | 0.45922700  | 2.14057800  | -2.21944200 | H                      | -1.60614700 | 1.83872200  | 4.64021200  |
| O                             | -0.46918400 | -2.11602800 | -2.22021400 | H                      | -2.88206500 | 2.26200400  | 3.48192400  |

|   |             |             |             |   |             |             |             |
|---|-------------|-------------|-------------|---|-------------|-------------|-------------|
| C | -0.99945500 | -4.21635900 | -1.13708500 | H | -3.30858900 | 1.76868000  | 5.13658600  |
| C | -2.29780200 | -4.39497900 | -1.95662700 | C | -2.34015500 | -0.80872700 | 5.03310600  |
| H | -2.17361500 | -4.02330800 | -2.97876300 | H | -3.03090600 | -0.63363600 | 5.86762800  |
| H | -2.56627900 | -5.45782400 | -2.00579500 | H | -2.40482400 | -1.86578200 | 4.75341700  |
| H | -3.13507900 | -3.85828400 | -1.49313600 | H | -1.32151200 | -0.61832300 | 5.38833100  |
| C | -1.20588300 | -4.76487700 | 0.28489600  | C | -4.15095000 | -0.19623100 | 3.39073000  |
| H | -1.46082500 | -5.83110100 | 0.23504900  | H | -4.24992300 | -1.23961800 | 3.06596400  |
| H | -0.30082900 | -4.65631700 | 0.89127300  | H | -4.85374300 | -0.03228900 | 4.21767600  |
| H | -2.01780000 | -4.24234700 | 0.80165600  | H | -4.44125400 | 0.44955800  | 2.55635600  |
| C | 0.15163500  | -4.98325500 | -1.82836300 | C | -4.81384600 | -1.43026600 | -2.33315200 |
| H | 1.09072400  | -4.87332600 | -1.27210600 | C | -4.82250800 | -0.43354600 | -3.32200400 |
| H | -0.08780300 | -6.05308400 | -1.87632300 | C | -5.90366100 | 0.44604100  | -3.45304300 |
| H | 0.31150400  | -4.61986100 | -2.84868700 | C | -7.00162200 | 0.34239000  | -2.59392000 |
| C | -0.15711000 | 4.99957900  | -0.36354800 | C | -7.00956400 | -0.64887600 | -1.60524700 |
| H | -1.11350100 | 4.88246300  | -0.88816700 | C | -5.92740300 | -1.52385400 | -1.48006400 |
| H | -0.28051600 | 4.62952400  | 0.65881500  | C | -3.64035200 | -2.37172800 | -2.17130300 |
| H | 0.07472200  | 6.07128600  | -0.32008000 | C | -2.67934000 | -1.98559700 | -1.00551000 |
| C | 1.12794600  | 4.79564000  | -2.52275300 | C | -1.60587900 | -3.07606700 | -0.89937100 |
| H | 1.37390600  | 5.86419500  | -2.48192600 | N | -2.08912000 | -0.67499400 | -1.18661600 |
| H | 1.92753600  | 4.28317200  | -3.06891000 | N | -0.82639900 | -3.02032300 | 0.36874800  |
| H | 0.20290100  | 4.68018300  | -3.09752700 | H | -3.97458600 | -0.34912800 | -3.99830000 |
| C | 2.30114900  | 4.43832600  | -0.31975200 | H | -5.88785900 | 1.20878200  | -4.22807700 |
| H | 3.13051200  | 3.91777600  | -0.81487100 | H | -7.84400400 | 1.02207600  | -2.69525300 |
| H | 2.55364900  | 5.50514100  | -0.27168700 | H | -7.86050600 | -0.74260400 | -0.93460300 |
| H | 2.21909900  | 4.05429500  | 0.70144900  | H | -5.94649500 | -2.29424300 | -0.71134700 |
| C | 4.58897900  | -1.06191900 | 1.93449700  | H | -4.02055900 | -3.38654400 | -1.98867600 |
| C | 3.97929300  | -1.53643000 | 3.10690900  | H | -3.05772900 | -2.40139700 | -3.10153900 |
| C | 4.33969300  | -1.03372200 | 4.36266100  | H | -3.28636800 | -2.04222800 | -0.07482600 |
| C | 5.32185500  | -0.04451100 | 4.46791800  | H | -2.07982900 | -4.06386500 | -0.98568600 |
| C | 5.94201500  | 0.43528600  | 3.30805400  | H | -0.89214800 | -2.96594600 | -1.72081400 |
| C | 5.57789900  | -0.07034400 | 2.05734300  | H | -2.82720000 | -0.01817300 | -1.44815900 |
| C | 4.18626100  | -1.58268800 | 0.57185300  | H | -0.11966100 | -3.75782900 | 0.32083700  |
| C | 3.21184700  | -0.63771300 | -0.19702600 | H | -1.44388400 | -3.26757600 | 1.14400800  |
| C | 3.00242800  | -1.21907700 | -1.60001900 | C | 1.94938500  | 4.72844400  | 0.07116700  |
| N | 1.96300700  | -0.44120000 | 0.50705300  | C | 0.80830900  | 5.51228500  | -0.16400400 |
| N | 2.22440200  | -0.31243900 | -2.49377000 | C | 0.72470400  | 6.35008500  | -1.28258500 |
| H | 3.21767100  | -2.30962600 | 3.03476500  | C | 1.78703500  | 6.42043700  | -2.18852200 |
| H | 3.85378500  | -1.41742400 | 5.25660600  | C | 2.93402100  | 5.64894600  | -1.96460500 |
| H | 5.60538100  | 0.34573700  | 5.44216800  | C | 3.01138900  | 4.81439300  | -0.84641700 |
| H | 6.71158800  | 1.20041500  | 3.37845400  | C | 2.03603500  | 3.80227800  | 1.26514600  |
| H | 6.07043700  | 0.30587100  | 1.16247200  | C | 1.79265500  | 2.30386200  | 0.91420100  |
| H | 5.08932400  | -1.72419600 | -0.03799900 | C | 1.98916600  | 1.47604300  | 2.19347800  |
| H | 3.70143700  | -2.56146400 | 0.67697000  | N | 0.49363200  | 2.07606100  | 0.32471800  |
| H | 3.75753000  | 0.32227400  | -0.32871500 | N | 2.11219300  | 0.01452600  | 1.92634000  |
| H | 3.98496900  | -1.41805800 | -2.04940700 | H | -0.02069500 | 5.46914600  | 0.53910100  |
| H | 2.45384800  | -2.16337400 | -1.53534700 | H | -0.16889800 | 6.94888900  | -1.44200900 |
| H | 2.15641500  | -0.26863800 | 1.49464800  | H | 1.72652900  | 7.07341000  | -3.05558600 |
| H | 2.30820700  | -0.66911400 | -3.44799400 | H | 3.77006800  | 5.70246900  | -2.65805700 |
| H | 2.68133700  | 0.60262200  | -2.51108700 | H | 3.91067900  | 4.22475600  | -0.67764500 |
| C | -4.58274200 | 1.01335800  | 1.96182600  | H | 3.03161700  | 3.89633700  | 1.72016600  |
| C | -3.97830100 | 1.49128100  | 3.13559000  | H | 1.29917100  | 4.10353500  | 2.02080300  |
| C | -4.32399800 | 0.97232900  | 4.38886600  | H | 2.62162100  | 2.01128100  | 0.22557000  |
| C | -5.28601100 | -0.03685900 | 4.49032600  | H | 2.89281200  | 1.82201400  | 2.71511500  |
| C | -5.90112000 | -0.52005200 | 3.32917800  | H | 1.12958200  | 1.62031400  | 2.85497700  |
| C | -5.55177400 | 0.00188000  | 2.08095000  | H | 0.23830700  | 2.86640700  | -0.26782200 |
| C | -4.19501500 | 1.55152200  | 0.60154400  | H | 2.31537400  | -0.44409400 | 2.81689900  |
| C | -3.20724200 | 0.62998000  | -0.17829800 | H | 2.93994600  | -0.14672600 | 1.34848600  |
| C | -3.01293600 | 1.22579800  | -1.57756800 | C | 4.77016500  | -2.44270500 | -1.42721700 |
| N | -1.95262100 | 0.45203500  | 0.52009600  | C | 4.92065700  | -3.72531100 | -0.87561100 |
| N | -2.23021600 | 0.33630500  | -2.48429400 | C | 6.02223500  | -4.04266500 | -0.07198800 |

|                        |             |             |             |                        |             |             |             |
|------------------------|-------------|-------------|-------------|------------------------|-------------|-------------|-------------|
| H                      | -3.23241400 | 2.27995300  | 3.06651700  | C                      | 6.99895400  | -3.07848900 | 0.19513700  |
| H                      | -3.84230200 | 1.35888400  | 5.28386300  | C                      | 6.86614000  | -1.79632900 | -0.35168000 |
| H                      | -5.55797800 | -0.43993400 | 5.46264700  | C                      | 5.76446600  | -1.48623200 | -1.15380800 |
| H                      | -6.65531500 | -1.30060100 | 3.39671000  | C                      | 3.57192700  | -2.08155600 | -2.27713200 |
| H                      | -6.04036600 | -0.37723300 | 1.18513300  | C                      | 2.49044600  | -1.25770000 | -1.51254200 |
| H                      | -5.10293600 | 1.68220300  | -0.00346600 | C                      | 1.39709800  | -0.85213400 | -2.51337600 |
| H                      | -3.72604800 | 2.53727500  | 0.71217000  | N                      | 1.93380400  | -1.98502400 | -0.38771700 |
| H                      | -3.73591000 | -0.33882500 | -0.31555200 | N                      | 0.57753900  | 0.30515600  | -2.05873700 |
| H                      | -4.00020500 | 1.41756500  | -2.01970900 | H                      | 4.16867600  | -4.48348000 | -1.08279300 |
| H                      | -2.47485700 | 2.17578700  | -1.50696000 | H                      | 6.11800700  | -5.04425900 | 0.34078900  |
| H                      | -2.13891200 | 0.27308500  | 1.50790900  | H                      | 7.85792400  | -3.32397600 | 0.81465100  |
| H                      | -2.31832700 | 0.70518200  | -3.43345500 | H                      | 7.62458100  | -1.04092400 | -0.15931600 |
| H                      | -2.68086000 | -0.58156900 | -2.51286000 | H                      | 5.67607300  | -0.48936500 | -1.58214300 |
|                        |             |             |             | H                      | 3.91294000  | -1.49488700 | -3.14174500 |
|                        |             |             |             | H                      | 3.09982700  | -2.99452200 | -2.66292200 |
|                        |             |             |             | H                      | 2.99451300  | -0.30816700 | -1.20773100 |
|                        |             |             |             | H                      | 1.85532400  | -0.60276900 | -3.48082600 |
|                        |             |             |             | H                      | 0.71835100  | -1.69651400 | -2.66488100 |
|                        |             |             |             | H                      | 2.71874700  | -2.35411200 | 0.15744700  |
|                        |             |             |             | H                      | -0.15070600 | 0.46467700  | -2.75721400 |
|                        |             |             |             | H                      | 1.15774000  | 1.14493700  | -2.04277900 |
| <b>PhPDA-bridge-3b</b> |             |             |             | <b>PhPDA- bridge-4</b> |             |             |             |
| C                      | 3.23179100  | -3.25175700 | 2.14186400  | Mo                     | -0.00005600 | 1.06292400  | -0.00009100 |
| C                      | 2.89312500  | -2.71694300 | 3.39530000  | Mo                     | 0.00001800  | -1.06302600 | -0.00006400 |
| C                      | 3.86165700  | -2.12405000 | 4.21369100  | C                      | -3.98437200 | 2.93753800  | -2.57390200 |
| C                      | 5.19295100  | -2.05639700 | 3.79199600  | C                      | -3.41467700 | 4.19264800  | -2.84279500 |
| C                      | 5.54703500  | -2.58848300 | 2.54634600  | C                      | -3.99167400 | 5.36965000  | -2.35130200 |
| C                      | 4.57539800  | -3.17943700 | 1.73416500  | C                      | -5.15583600 | 5.31262400  | -1.57908100 |
| C                      | 2.18694200  | -3.87213200 | 1.24023700  | C                      | -5.73891800 | 4.06920300  | -1.30613900 |
| C                      | 1.69434100  | -2.92103800 | 0.10471600  | C                      | -5.15808900 | 2.89796100  | -1.80018900 |
| C                      | 0.74390800  | -3.71445200 | -0.79992200 | C                      | -3.35394300 | 1.65865800  | -3.07928200 |
| N                      | 1.08151900  | -1.71981500 | 0.61928600  | C                      | -2.52601500 | 0.90054400  | -1.99651900 |
| N                      | 0.47610100  | -3.02924200 | -2.09932500 | C                      | -2.03258100 | -0.41992700 | -2.60638600 |
| H                      | 1.86046300  | -2.76734000 | 3.73263200  | N                      | -1.42078000 | 1.68593700  | -1.48874000 |
| H                      | 3.57441600  | -1.71714500 | 5.18042100  | N                      | -1.61362700 | -1.42243700 | -1.58795500 |
| H                      | 5.94750000  | -1.59884000 | 4.42710000  | H                      | -2.51229800 | 4.24697000  | -3.44772300 |
| H                      | 6.58045500  | -2.54667700 | 2.20987300  | H                      | -3.53300000 | 6.32982600  | -2.57588800 |
| H                      | 4.86269200  | -3.59469300 | 0.76978000  | H                      | -5.60874300 | 6.22548300  | -1.20030500 |
| H                      | 2.60666800  | -4.77808200 | 0.78040500  | H                      | -6.64964000 | 4.01295700  | -0.71431000 |
| H                      | 1.31565000  | -4.17523400 | 1.83477900  | H                      | -5.62448300 | 1.93718200  | -1.58957100 |
| H                      | 2.59618300  | -2.69389800 | -0.51254300 | H                      | -4.14637200 | 0.99092200  | -3.44545100 |
| H                      | 1.17969800  | -4.70404600 | -0.99853400 | H                      | -2.69163900 | 1.88039400  | -3.92633200 |
| H                      | -0.21762300 | -3.85138100 | -0.29886400 | H                      | -3.25419700 | 0.61950000  | -1.19747400 |
| H                      | 1.68931700  | -1.32578200 | 1.33897900  | H                      | -2.82271900 | -0.85654100 | -3.23381800 |
| H                      | -0.06974300 | -3.67461800 | -2.67451400 | H                      | -1.16451300 | -0.21701100 | -3.24097200 |
| H                      | 1.36884900  | -2.93438800 | -2.58943700 | H                      | -1.76669200 | 2.62397600  | -1.27225000 |
| Mo                     | -0.76556300 | -1.09598900 | -.06399300  | H                      | -1.22867500 | -2.22557400 | -2.09007800 |
| O                      | -2.40264700 | -2.21416100 | -1.12388900 | H                      | -2.44116200 | -1.76182900 | -1.09515600 |
| C                      | -2.59534900 | -2.03519800 | 0.13410400  | C                      | 3.98411600  | 2.93783300  | 2.57394900  |
| C                      | -3.77662100 | -2.79273900 | 0.78088500  | C                      | 3.41439300  | 4.19293600  | 2.84281200  |
| Mo                     | -0.03357500 | -0.18774600 | -.24311700  | C                      | 3.99141000  | 5.36994500  | 2.35136000  |
| O                      | -1.85818800 | -1.29096500 | 0.83495600  | C                      | 5.15562000  | 5.31293300  | 1.57921200  |
| C                      | -5.07418200 | -2.46104000 | 0.01131900  | C                      | 5.73873000  | 4.06951900  | 1.30630000  |
| H                      | -5.29855600 | -1.38776800 | 0.05935600  | C                      | 5.15788200  | 2.89827000  | 1.80031000  |
| H                      | -4.99315700 | -2.74794100 | -1.04195000 | C                      | 3.35367100  | 1.65894300  | 3.07928800  |
| H                      | -5.92265700 | -3.00068800 | 0.45193000  | C                      | 2.52595600  | 0.90075400  | 1.99642600  |
| C                      | -3.93965600 | -2.39910000 | 2.25857300  | C                      | 2.03259600  | -0.41977000 | 2.60622600  |
| H                      | -4.78233200 | -2.94853800 | 2.69850200  | N                      | 1.42070000  | 1.68602000  | 1.48851400  |
| H                      | -3.03861700 | -2.63140100 | 2.83511700  | N                      | 1.61377100  | -1.42227200 | 1.58776300  |
| H                      | -4.13493100 | -1.32681600 | 2.36691300  | H                      | 2.51197400  | 4.24724800  | 3.44768100  |

|   |             |             |             |   |             |             |             |
|---|-------------|-------------|-------------|---|-------------|-------------|-------------|
| C | -3.49666400 | -4.30977600 | 0.67875900  | H | 3.53271300  | 6.33011600  | 2.57592200  |
| H | -2.57692000 | -4.57911100 | 1.21277200  | H | 5.60854100  | 6.22579800  | 1.20046500  |
| H | -4.32335600 | -4.87643300 | 1.12685400  | H | 6.64948900  | 4.01328200  | 0.71452600  |
| H | -3.39164000 | -4.62220300 | -0.36551200 | H | 5.62430000  | 1.93749700  | 1.58971800  |
| C | 3.60326000  | 3.12733800  | -1.24147500 | H | 4.14607600  | 0.99126000  | 3.44560800  |
| C | 4.15443000  | 3.00320000  | 0.04390200  | H | 2.69122800  | 1.88068300  | 3.92622800  |
| C | 4.26188800  | 4.11028700  | 0.89371500  | H | 3.25426800  | 0.61978800  | 1.19746500  |
| C | 3.82004600  | 5.36701100  | 0.46975400  | H | 2.82274100  | -0.85633000 | 3.23369000  |
| C | 3.27249900  | 5.50742500  | -0.81109700 | H | 1.16448800  | -0.21692500 | 3.24078300  |
| C | 3.16777500  | 4.39844500  | -1.65473800 | H | 1.76654100  | 2.62407900  | 1.27200500  |
| C | 3.46463100  | 1.93047100  | -2.15758200 | H | 1.22893700  | -2.22549100 | 2.08984300  |
| C | 2.02446700  | 1.33349500  | -2.20624100 | H | 2.44132500  | -1.76151200 | 1.09489500  |
| C | 2.01932200  | 0.19645100  | -3.23677700 | C | 3.98437700  | -2.93759900 | -2.57385100 |
| N | 1.57730000  | 0.89242800  | -0.90637300 | C | 3.41487100  | -4.19279200 | -2.84275800 |
| N | 0.64388900  | -0.20175700 | -3.65728300 | C | 3.99200600  | -5.36970700 | -2.35121900 |
| H | 4.50421700  | 2.02990300  | 0.38075800  | C | 5.15611600  | -5.31250800 | -1.57893300 |
| H | 4.69187100  | 3.98892500  | 1.88510300  | C | 5.73901000  | -4.06900300 | -1.30597500 |
| H | 3.90434700  | 6.22891200  | 1.12698900  | C | 5.15804600  | -2.89784900 | -1.80007400 |
| H | 2.93031900  | 6.48130000  | -1.15347900 | C | 3.35381100  | -1.65881100 | -3.07930400 |
| H | 2.74454400  | 4.51982800  | -2.65025500 | C | 2.52588200  | -0.90068900 | -1.99656000 |
| H | 3.75196000  | 2.22610500  | -3.17613600 | C | 2.03228800  | 0.41970200  | -2.60647900 |
| H | 4.15377900  | 1.13832900  | -1.83749700 | N | 1.42072300  | -1.68615900 | -1.48868900 |
| H | 1.37040900  | 2.13671500  | -2.61846700 | N | 1.61349400  | 1.42232000  | -1.58808900 |
| H | 2.59039600  | 0.50910600  | -4.12239100 | H | 2.51252900  | -4.24724900 | -3.44772900 |
| H | 2.50419100  | -0.68367200 | -2.80230700 | H | 3.53347700  | -6.32995000 | -2.57581700 |
| H | 1.83521200  | 1.59358900  | -0.21070200 | H | 5.60912900  | -6.22529900 | -1.20011700 |
| H | 0.74090700  | -0.88707300 | -4.41056300 | H | 6.64969100  | -4.01262200 | -0.71409500 |
| H | 0.21352300  | 0.60971500  | -4.10537700 | H | 5.62429800  | -1.93700300 | -1.58944600 |
| C | -3.18128200 | 3.46499800  | 1.33258100  | H | 4.14616500  | -0.99104300 | -3.44558100 |
| C | -2.17818100 | 4.07632000  | 2.10178800  | H | 2.69148300  | -1.88067900 | -3.92629900 |
| C | -2.32974800 | 4.24692300  | 3.48287900  | H | 3.25406800  | -0.61954400 | -1.19755900 |
| C | -3.49360300 | 3.80883300  | 4.12149400  | H | 2.82228900  | 0.85626400  | -3.23412300 |
| C | -4.50436100 | 3.20093000  | 3.36730300  | H | 1.16410100  | 0.21667700  | -3.24086500 |
| C | -4.34706900 | 3.03350600  | 1.98900700  | H | 1.76673200  | -2.62414900 | -1.27213700 |
| C | -3.01520100 | 3.25700000  | -0.15690000 | H | 1.22837500  | 2.22537100  | -2.09022700 |
| C | -2.58149200 | 1.81023800  | -0.54844600 | H | 2.44110300  | 1.76181000  | -1.09548800 |
| C | -2.55424300 | 1.72695000  | -2.08035200 | C | -3.98415000 | -2.93765900 | 2.57400800  |
| N | -1.30611100 | 1.44588900  | 0.02403800  | C | -3.41457300 | -4.19281300 | 2.84294200  |
| N | -2.48345100 | 0.32550200  | -2.58330200 | C | -3.99169600 | -5.36977900 | 2.35150900  |
| H | -1.27086900 | 4.42357200  | 1.61253800  | C | -5.15586400 | -5.31267100 | 1.57930600  |
| H | -1.53853900 | 4.72303600  | 4.05725900  | C | -5.73882900 | -4.06920400 | 1.30632200  |
| H | -3.61459900 | 3.94156400  | 5.19372300  | C | -5.15787600 | -2.89799900 | 1.80031300  |
| H | -5.41586400 | 2.85983300  | 3.85264900  | C | -3.35360500 | -1.65882000 | 3.07935400  |
| H | -5.14093800 | 2.56320400  | 1.41155300  | C | -2.52578700 | -0.90070200 | 1.99652100  |
| H | -3.96778600 | 3.48279200  | -0.65626100 | C | -2.03219800 | 0.41972900  | 2.60637200  |
| H | -2.26433500 | 3.95674900  | -0.54673600 | N | -1.42065600 | -1.68614100 | 1.48857600  |
| H | -3.40051700 | 1.13858000  | -0.20618400 | N | -1.61355000 | 1.42235200  | 1.58794500  |
| H | -3.45498300 | 2.20942000  | -2.48633500 | H | -2.51218200 | -4.24719900 | 3.44784600  |
| H | -1.67377100 | 2.26050300  | -2.45217900 | H | -3.53311100 | -6.32999100 | 2.57612500  |
| H | -1.28107900 | 1.75079500  | 0.99868400  | H | -5.60887000 | -6.22550100 | 1.20057700  |
| H | -2.59540000 | 0.35869900  | -3.59879200 | H | -6.64955400 | -4.01289200 | 0.71450300  |
| H | -3.31050800 | -0.17419400 | -2.24393100 | H | -5.62418100 | -1.93718300 | 1.58966300  |
|   |             |             |             | H | -4.14596400 | -0.99107300 | 3.44566100  |
|   |             |             |             | H | -2.69120500 | -1.88062000 | 3.92631200  |
|   |             |             |             | H | -3.25405200 | -0.61959200 | 1.19757300  |
|   |             |             |             | H | -2.82217100 | 0.85624300  | 3.23408800  |
|   |             |             |             | H | -1.16394800 | 0.21676200  | 3.24068900  |
|   |             |             |             | H | -1.76665200 | -2.62413700 | 1.27203000  |
|   |             |             |             | H | -1.22834200 | 2.22539700  | 2.09001600  |
|   |             |             |             | H | -2.44121700 | 1.76184100  | 1.09544300  |



| PhPDA-chel-1 |             |             |             | PhPDA-chel-1s |             |             |             |
|--------------|-------------|-------------|-------------|---------------|-------------|-------------|-------------|
| Mo           | 1.06063400  | 0.07183300  | 0.68368800  | Mo            | 1.18512300  | 0.74673200  | 0.70412500  |
| O            | 2.85365200  | -0.92890900 | 0.16022400  | O             | -0.34765300 | 2.00708600  | 1.72475300  |
| O            | 0.57533000  | -1.53947800 | 1.97490900  | O             | 1.47740700  | -0.92268100 | 1.97349900  |
| C            | -0.11952300 | -2.51911500 | 1.53464100  | C             | 1.05694800  | -2.06610300 | 1.59644500  |
| C            | -0.48078900 | -3.66197600 | 2.48533200  | C             | 1.23030000  | -3.29957900 | 2.48428100  |
| Mo           | 0.03410300  | -0.90221500 | -0.93611000 | Mo            | 0.17446800  | -0.48059800 | -0.74287300 |
| O            | -0.51360000 | -2.52739100 | 0.31839400  | O             | 0.44919900  | -2.18828500 | 0.47266600  |
| O            | 1.80600500  | -1.90471400 | -1.52894500 | O             | 0.87695500  | 2.89026200  | 0.13690400  |
| C            | 2.87209000  | -1.71663200 | -0.84501500 | C             | -0.00536400 | 3.03978000  | 1.05464400  |
| C            | 4.15678200  | -2.44134400 | -1.25009700 | C             | -0.57352800 | 4.42325200  | 1.37262600  |
| O            | -0.19183700 | 1.30038300  | 1.85911600  | O             | 3.06174300  | 0.31522400  | -0.18747400 |
| O            | -2.27805000 | 1.69795100  | 1.11878600  | O             | 2.04736700  | -0.90560700 | -1.73823500 |
| C            | -1.36072000 | 1.83647100  | 1.95535300  | C             | 3.11627400  | -0.39373500 | -1.24689800 |
| C            | -1.57507800 | 2.70644300  | 3.21876000  | C             | 4.44907500  | -0.61045500 | -1.96944200 |
| O            | 1.97986200  | 1.87409800  | 0.08833200  | C             | -1.89089100 | 4.30083300  | 2.15865300  |
| O            | 2.38606800  | 2.08972600  | -2.11461900 | H             | -2.65673300 | 3.77653600  | 1.57545700  |
| C            | 2.54549100  | 2.43969300  | -0.92698400 | H             | -1.74936400 | 3.75489500  | 3.09605300  |
| C            | 3.45652900  | 3.64084600  | -0.57389100 | H             | -2.27132200 | 5.30183400  | 2.39526000  |
| C            | -1.27325700 | -4.75655300 | 1.75092200  | C             | -0.80352300 | 5.20764200  | 0.06505400  |
| H            | -0.69567800 | -5.18509400 | 0.92492600  | H             | -1.17797700 | 6.21140300  | 0.29908000  |
| H            | -1.51686300 | -5.56344900 | 2.45238200  | H             | 0.12308100  | 5.30908900  | -0.50736500 |
| H            | -2.21083600 | -4.36720200 | 1.34045900  | H             | -1.54712800 | 4.71191800  | -0.57099500 |
| C            | 0.82713600  | -4.25372000 | 3.06008400  | C             | 0.48490800  | 5.15593800  | 2.23637100  |
| H            | 1.40628300  | -3.49205400 | 3.59095700  | H             | 1.43274700  | 5.26044200  | 1.69742000  |
| H            | 0.58803400  | -5.06024400 | 3.76361000  | H             | 0.12072500  | 6.15915900  | 2.48874500  |
| H            | 1.45593700  | -4.67314900 | 2.26541800  | H             | 0.67469600  | 4.61837100  | 3.17271300  |
| C            | -1.33336900 | -3.07918100 | 3.63779500  | C             | 1.91802500  | -4.41387800 | 1.66330800  |
| H            | -2.26650900 | -2.64357900 | 3.26072000  | H             | 2.02696900  | -5.31330100 | 2.28150900  |
| H            | -1.59328900 | -3.87772600 | 4.34321200  | H             | 1.33108900  | -4.67268300 | 0.77683900  |
| H            | -0.78620200 | -2.30242400 | 4.18068100  | H             | 2.91814800  | -4.10537800 | 1.33542400  |
| C            | -1.31823400 | 1.83947200  | 4.47143400  | C             | 2.07540100  | -2.96537400 | 3.72518000  |
| H            | -0.29859900 | 1.44289600  | 4.47649700  | H             | 1.60700700  | -2.18289500 | 4.33080500  |
| H            | -1.46084000 | 2.44195300  | 5.37768500  | H             | 2.18295000  | -3.86241500 | 4.34696200  |
| H            | -2.01485900 | 0.99287100  | 4.51803500  | H             | 3.07725600  | -2.62091600 | 3.44659500  |
| C            | -0.56564400 | 3.87607700  | 3.18671400  | C             | -0.17755700 | -3.77383100 | 2.91996100  |
| H            | 0.46469900  | 3.50839800  | 3.17014400  | H             | -0.69416800 | -3.00067200 | 3.50114000  |
| H            | -0.71816300 | 4.50797800  | 2.30281100  | H             | -0.79684400 | -4.02196600 | 2.05229600  |
| H            | -0.69545100 | 4.50538500  | 4.07652600  | H             | -0.08713600 | -4.66787400 | 3.54905500  |
| C            | -3.00793700 | 3.26226400  | 3.26036300  | C             | 4.67121500  | -2.12814100 | -2.15896500 |
| H            | -3.13989300 | 3.87961000  | 4.15816500  | H             | 3.85493400  | -2.57925000 | -2.73123300 |
| H            | -3.22290200 | 3.88215500  | 2.38355700  | H             | 5.61034800  | -2.30041400 | -2.69882500 |
| H            | -3.74910900 | 2.45615800  | 3.28830500  | H             | 4.73737100  | -2.64232400 | -1.19256100 |
| C            | 5.31606300  | -2.06525000 | -0.31193000 | C             | 5.61401300  | -0.00786100 | -1.16588400 |
| H            | 5.52228300  | -0.99041000 | -0.34054500 | H             | 6.55584300  | -0.17921400 | -1.70121700 |
| H            | 5.09767800  | -2.33841900 | 0.72569900  | H             | 5.49060000  | 1.07095400  | -1.02654600 |
| H            | 6.22365400  | -2.59681200 | -0.62227200 | H             | 5.69647700  | -0.46734800 | -0.17504400 |
| C            | 4.50427900  | -2.04125400 | -2.70328900 | C             | 4.35962300  | 0.07439200  | -3.35456000 |
| H            | 5.41874500  | -2.55840800 | -3.01792100 | H             | 5.29919100  | -0.07176900 | -3.90123000 |
| H            | 3.69922300  | -2.31473700 | -3.39260700 | H             | 3.54534000  | -0.34790700 | -3.95235900 |
| H            | 4.67820000  | -0.96206900 | -2.78711900 | H             | 4.19270500  | 1.15385100  | -3.25366800 |
| C            | 3.89762600  | -3.96487500 | -1.18129100 | C             | -4.92590800 | -0.51067700 | -0.98171800 |
| H            | 3.07763600  | -4.25746700 | -1.84459800 | C             | -5.25052300 | -0.67659500 | 0.37273100  |
| H            | 4.80076800  | -4.50614900 | -1.48798200 | C             | -6.06492900 | -1.73305700 | 0.79475500  |
| H            | 3.64520900  | -4.27889600 | -0.16128100 | C             | -6.57213600 | -2.64472400 | -0.13622200 |
| C            | -4.88499600 | 0.61029600  | -2.05767200 | C             | -6.26095900 | -2.48851200 | -1.49167400 |
| C            | -5.42170600 | 0.53823800  | -0.76231600 | C             | -5.44776200 | -1.43007200 | -1.90662700 |
| C            | -6.56813400 | -0.22119000 | -0.50282800 | C             | -4.03266400 | 0.61989700  | -1.44727900 |
| C            | -7.19710700 | -0.92113000 | -1.53711300 | C             | -2.56376600 | 0.20641900  | -1.69148400 |
| C            | -6.67340600 | -0.85475300 | -2.83328800 | C             | -1.79020200 | 1.33459100  | -2.40231000 |

|                     |             |             |             |   |             |             |             |
|---------------------|-------------|-------------|-------------|---|-------------|-------------|-------------|
| C                   | -5.52810100 | -0.09490200 | -3.08849400 | N | -1.83983600 | -0.16417500 | -0.47677700 |
| C                   | -3.62892700 | 1.41131000  | -2.33587700 | N | -0.35806100 | 0.91977400  | -2.48726400 |
| C                   | -2.34114400 | 0.55804900  | -2.34389500 | H | -4.86372100 | 0.02801900  | 1.10568500  |
| C                   | -1.10720100 | 1.39094800  | -2.70014100 | H | -6.30208800 | -1.84235400 | 1.85026300  |
| N                   | -2.07267400 | -0.10751900 | -1.03675800 | H | -7.20654400 | -3.46533500 | 0.18920300  |
| N                   | 0.10452300  | 0.53364000  | -2.66863600 | H | -6.65516800 | -3.18711700 | -2.22589900 |
| H                   | -4.93920900 | 1.08341500  | 0.04594900  | H | -5.21793100 | -1.31335200 | -2.96439500 |
| H                   | -6.97024800 | -0.26147800 | 0.50648600  | H | -4.43421600 | 1.03526800  | -2.38190100 |
| H                   | -8.09001400 | -1.50803400 | -1.33756400 | H | -4.04438000 | 1.43458100  | -0.70969200 |
| H                   | -7.15986000 | -1.38857700 | -3.64601500 | H | -2.57316700 | -0.66096500 | -2.37279200 |
| H                   | -5.13436000 | -0.04109100 | -4.10199100 | H | -2.19014000 | 1.56021700  | -3.40007800 |
| H                   | -3.71357500 | 1.90154000  | -3.31434500 | H | -1.83261700 | 2.24497800  | -1.79581200 |
| H                   | -3.51684800 | 2.20409800  | -1.58630800 | H | -2.17124900 | 0.37515500  | 0.32228100  |
| H                   | -2.45005700 | -0.24000100 | -3.09051400 | H | 0.25203000  | 1.73576400  | -2.52263000 |
| H                   | -1.23439800 | 1.86434500  | -3.68099000 | H | -0.19171700 | 0.40730400  | -3.35542200 |
| H                   | -0.96750000 | 2.18351400  | -1.95770200 |   |             |             |             |
| H                   | -2.17052200 | 0.57422100  | -0.25832000 |   |             |             |             |
| H                   | 0.96063500  | 1.11041200  | -2.56718600 |   |             |             |             |
| H                   | 0.19010300  | 0.01531100  | -3.54512200 |   |             |             |             |
| C                   | 4.13022900  | 4.20326900  | -1.83622500 |   |             |             |             |
| H                   | 3.39007800  | 4.55048800  | -2.56480600 |   |             |             |             |
| H                   | 4.77103900  | 5.05252600  | -1.56672600 |   |             |             |             |
| H                   | 4.75281700  | 3.44783400  | -2.32786900 |   |             |             |             |
| C                   | 4.53611600  | 3.17446900  | 0.42774100  |   |             |             |             |
| H                   | 5.18918200  | 4.01632300  | 0.69101800  |   |             |             |             |
| H                   | 4.08371500  | 2.78749700  | 1.34550800  |   |             |             |             |
| H                   | 5.16356100  | 2.38442700  | -0.00367400 |   |             |             |             |
| C                   | 2.58508900  | 4.73654700  | 0.08157500  |   |             |             |             |
| H                   | 3.20934700  | 5.59847600  | 0.34997700  |   |             |             |             |
| H                   | 1.80569000  | 5.08796400  | -0.60652700 |   |             |             |             |
| H                   | 2.09891300  | 4.36512700  | 0.98863500  |   |             |             |             |
| H                   | -2.77189400 | -0.83265500 | -0.86963000 |   |             |             |             |
| <b>PhPDA-chel-2</b> |             |             |             |   |             |             |             |
| Mo                  | -0.71756100 | 0.48401700  | 0.80211000  |   |             |             |             |
| O                   | 0.42229200  | 1.97278600  | 1.87755900  |   |             |             |             |
| C                   | 1.49684600  | 2.41143900  | 1.33945900  |   |             |             |             |
| C                   | 2.38540400  | 3.40025600  | 2.10393100  |   |             |             |             |
| Mo                  | 0.70586200  | 0.48752900  | -0.79775500 |   |             |             |             |
| O                   | 1.87234000  | 1.98857200  | 0.19208800  |   |             |             |             |
| O                   | -1.87602700 | 2.00080900  | -0.17590600 |   |             |             |             |
| O                   | -0.42722300 | 1.98729100  | -1.86295600 |   |             |             |             |
| C                   | -1.49856100 | 2.42997100  | -1.31880700 |   |             |             |             |
| C                   | -2.34007100 | 3.46509700  | -2.07503600 |   |             |             |             |
| C                   | 3.09647700  | 4.34731000  | 1.11755800  |   |             |             |             |
| H                   | 3.74344500  | 5.03916200  | 1.67082400  |   |             |             |             |
| H                   | 3.71272300  | 3.79154400  | 0.40509200  |   |             |             |             |
| H                   | 2.37290300  | 4.94250600  | 0.54778000  |   |             |             |             |
| C                   | 1.54607500  | 4.21784700  | 3.10340600  |   |             |             |             |
| H                   | 1.04695900  | 3.57142400  | 3.83126900  |   |             |             |             |
| H                   | 2.19582400  | 4.91436100  | 3.64742900  |   |             |             |             |
| H                   | 0.77555800  | 4.80402100  | 2.58895000  |   |             |             |             |
| C                   | 3.44256000  | 2.56802800  | 2.87328700  |   |             |             |             |
| H                   | 2.96670800  | 1.88331200  | 3.58524600  |   |             |             |             |
| H                   | 4.05993600  | 1.97915300  | 2.18560200  |   |             |             |             |
| H                   | 4.10372500  | 3.23801500  | 3.43698900  |   |             |             |             |
| C                   | -1.43582400 | 4.65819100  | -2.45879100 |   |             |             |             |
| H                   | -0.59338200 | 4.33345400  | -3.07706400 |   |             |             |             |
| H                   | -2.01681400 | 5.39756000  | -3.02384400 |   |             |             |             |
| H                   | -1.03463900 | 5.15384100  | -1.56641900 |   |             |             |             |
| C                   | -3.51410700 | 3.95705900  | -1.21169600 |   |             |             |             |

|   |             |             |             |
|---|-------------|-------------|-------------|
| H | -4.09857200 | 4.69590100  | -1.77381900 |
| H | -4.18003500 | 3.13427400  | -0.93211000 |
| H | -3.16167700 | 4.43142000  | -0.28935300 |
| C | -2.88233200 | 2.79625400  | -3.36105200 |
| H | -3.48081700 | 3.51775300  | -3.93096200 |
| H | -2.06429600 | 2.44757200  | -3.99983800 |
| H | -3.52439300 | 1.93947100  | -3.12231800 |
| C | 4.48964400  | -2.96615400 | -0.79810900 |
| C | 4.97264200  | -2.87445900 | 0.51689600  |
| C | 6.31041000  | -2.55360100 | 0.77484600  |
| C | 7.19305100  | -2.31818400 | -0.28354500 |
| C | 6.72703700  | -2.40917000 | -1.60040700 |
| C | 5.39037500  | -2.73101800 | -1.85138300 |
| C | 3.03769200  | -3.28601600 | -1.08195800 |
| C | 2.18225000  | -2.03841700 | -1.42431300 |
| C | 0.76686200  | -2.46662300 | -1.83274000 |
| N | 2.04186800  | -1.09490400 | -0.31216500 |
| N | -0.13454500 | -1.27764800 | -1.91561600 |
| H | 4.29452600  | -3.06114900 | 1.34670300  |
| H | 6.66173400  | -2.49075000 | 1.80208400  |
| H | 8.23325700  | -2.07164100 | -0.08617300 |
| H | 7.40582800  | -2.23445000 | -2.43183800 |
| H | 5.04060300  | -2.80594300 | -2.87942600 |
| H | 2.98086300  | -3.98930200 | -1.92544200 |
| H | 2.58816700  | -3.78133000 | -0.21150800 |
| H | 2.65397800  | -1.56556700 | -2.30967400 |
| H | 0.77563600  | -3.00850100 | -2.78523100 |
| H | 0.36068200  | -3.14006700 | -1.06989300 |
| H | 2.96740000  | -0.79797800 | 0.00219300  |
| H | -1.00472800 | -1.44863400 | -1.36540600 |
| H | -0.39904700 | -1.08394700 | -2.88041000 |
| C | -4.51768100 | -2.95225200 | 0.77731800  |
| C | -5.00146200 | -2.84490500 | -0.53621200 |
| C | -6.33808400 | -2.51576300 | -0.78959500 |
| C | -7.21881000 | -2.28774600 | 0.27201000  |
| C | -6.75203300 | -2.39441900 | 1.58742100  |
| C | -5.41650100 | -2.72437300 | 1.83381300  |
| C | -3.06674500 | -3.28064100 | 1.05645900  |
| C | -2.20576100 | -2.03963600 | 1.40890900  |
| C | -0.79220000 | -2.47761000 | 1.81341300  |
| N | -2.06173400 | -1.08731800 | 0.30475000  |
| N | 0.11506000  | -1.29373900 | 1.90551900  |
| H | -4.32481500 | -3.02584300 | -1.36848600 |
| H | -6.69003300 | -2.44066300 | -1.81579600 |
| H | -8.25814100 | -2.03476900 | 0.07819600  |
| H | -7.42935500 | -2.22550700 | 2.42124800  |
| H | -5.06611000 | -2.81131100 | 2.86070000  |
| H | -3.01184000 | -3.99171000 | 1.89352800  |
| H | -2.62021300 | -3.76989100 | 0.18105000  |
| H | -2.67520100 | -1.57217400 | 2.29833200  |
| H | -0.80339900 | -3.02690000 | 2.76162500  |
| H | -0.38943100 | -3.14709100 | 1.04525800  |
| H | -2.98617400 | -0.78348600 | -0.00634000 |
| H | 0.98369500  | -1.46416800 | 1.35254500  |
| H | 0.38177700  | -1.11011000 | 2.87164000  |
